# Supplementary material for: Systematic review of instruments for measuring sex and gender attributes: Assessment of measurement properties and utility in research on clinical and functional outcomes
Source: Research Square preprint supplement (doi:10.21203/rs.3.rs-7754711/v1), 2025-10-15
Supplement: Supplementary file 1 [file 28d62e33a8d010b1202b257b.docx]

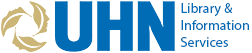


Literature Search Service
Results of your search request

For: Tatyana Mollayeva

Date Completed: March 11, 2025

**Attached is your search for**: Properties (e.g. validity, reliability) of identified sex & gender measures.

**The databases searched were**: MEDLINE(R) ALL

**Search Completed By:** Cynthia Chui, Information Specialist.

It is important that you are satisfied with your search results. If you have any questions regarding this search, or if the results were not satisfactory, please do not hesitate in contacting me at [Cynthia.Chui@uhn.ca](mailto:Cynthia.Chui@uhn.ca)

**To request articles not available in our library system, please fill an** [**article request form**](https://guides.hsict.library.utoronto.ca/c.php?g=696870&p=4946519)**.**

**** If you are affiliated with a research institute or university (such as the University of Toronto) or are attending a program at a college/university, please see if the institution has access to the article first before filling out the article request form.**

## Search Strategy

**Database:** Ovid MEDLINE(R) ALL <1946 to March 10, 2025>

| **#** | **Query** | **Results from 11 Mar 2025** |
| --- | --- | --- |
| 1 | bem sex role inventory.tw,kf. | 298 |
| 2 | conformity to? masculine norms inventory.tw,kf. | 34 |
| 3 | personal attributes questionnaire.tw,kf. | 60 |
| 4 | (masculine role norms inventory or male role norms inventory).tw,kf. | 11 |
| 5 | (gender equitable men scale or GEM scale).tw,kf. | 35 |
| 6 | (GENESIS-PRAXY or GENdEr and? Sex DetermInantS of? Cardiovascular Disease From? Bench to? Beyond Premature Acute Coronary Syndrome).tw,kf. | 22 |
| 7 | gender role conflict scale.tw,kf. | 17 |
| 8 | attitudes toward women scale.tw,kf. | 23 |
| 9 | masculine gender role discrepancy stress scale.tw,kf. | 0 |
| 10 | (lifelines and gender index).tw,kf. | 3 |
| 11 | gender role index.tw,kf. | 1 |
| 12 | (GOING-FWD or Gender Outcomes INternational Group To? Further Well-being Development).tw,kf. | 2 |
| 13 | conformity to feminine norms inventory.tw,kf. | 6 |
| 14 | drive for muscularity scale.tw,kf. | 50 |
| 15 | marianismo beliefs scale.tw,kf. | 5 |
| 16 | (MCD-I or masculinity in chronic disease inventory).tw,kf. | 9 |
| 17 | normative male alexithymia scale.tw,kf. | 3 |
| 18 | male role attitudes scale.tw,kf. | 1 |
| 19 | gender climate scale.tw,kf. | 1 |
| 20 | gender role orientation scale.tw,kf. | 3 |
| 21 | macho scale.tw,kf. | 2 |
| 22 | (minnesota multiphase personality inventory or minnesota multiphasic personality inventory).tw,kf. | 2,359 |
| 23 | femininity ideology scale.tw,kf. | 4 |
| 24 | gendered views of? nursing careers scale.tw,kf. | 0 |
| 25 | femininity score.tw,kf. | 8 |
| 26 | sex-typed behaviors and? attitudes score.tw,kf. | 0 |
| 27 | masculine gender score.tw,kf. | 3 |
| 28 | gender self-report.tw,kf. | 11 |
| 29 | masculine measure.tw,kf. | 0 |
| 30 | self-perceived gender expression.tw,kf. | 1 |
| 31 | or/1-30 | 2,941 |
| 32 | Validation Studies.pt. | 0 |
| 33 | exp Psychometrics/ | 94,953 |
| 34 | (validation or validity).tw,kf. | 565,091 |
| 35 | exp "Reproducibility of Results"/ | 493,199 |
| 36 | exp Discriminant Analysis/ | 12,392 |
| 37 | (reliab* or unreliab* or valid* or coefficient or homogeneity or homogeneous or "internal consistency").tw,kf. | 2,092,702 |
| 38 | (agreement or precision or imprecision or "precise values" or test-retest).tw,kf. | 607,738 |
| 39 | (test and retest).tw,kf. | 38,903 |
| 40 | (reliab* and (test or retest)).tw,kf. | 129,461 |
| 41 | exp "Sensitivity and Specificity"/ | 679,385 |
| 42 | exp Longitudinal Studies/ | 181,688 |
| 43 | (longitudinal* or responsiv*).tw,kf. | 706,268 |
| 44 | or/32-43 | 3,833,820 |
| 45 | 1 and 44 [bem sex inventory] | 69 |
| 46 | 2 and 44 [conformity to masculine norms inventory] | 14 |
| 47 | 3 and 44 [personal attributes questionnaire] | 20 |
| 48 | 4 and 44 [masculine role norms inventory or male role norms inventory] | 6 |
| 49 | 5 and 44 [gender equitable men scale] | 9 |
| 50 | 6 and 44 [GENESIS-PRAXY] | 6 |
| 51 | 7 and 44 [gender role conflict scale] | 9 |
| 52 | 8 and 44 [attitudes toward women scale] | 3 |
| 53 | 9 and 44 [masculine gender role discrepancy stress scale] | 0 |
| 54 | 10 and 44 [lifelines gender index] | 2 |
| 55 | 11 and 44 [gender role index] | 0 |
| 56 | 12 and 44 [GOING-FWD] | 2 |
| 57 | 13 and 44 [conformity to feminine norms inventory] | 2 |
| 58 | 14 and 44 [drive for muscularity scale] | 32 |
| 59 | 15 and 44 [marianismo beliefs scale] | 1 |
| 60 | 16 and 44 [masculinity in chronic disease inventory] | 4 |
| 61 | 17 and 44 [normative male alexithymia scale] | 2 |
| 62 | 18 and 44 [male role attitudes scale] | 1 |
| 63 | 19 and 44 [gender climate scale] | 1 |
| 64 | 20 and 44 [gender role orientation scale] | 2 |
| 65 | 21 and 44 [macho scale] | 0 |
| 66 | 22 and 44 [minnesota multiphasic personality inventory] | 1,184 |
| 67 | 23 and 44 [femininity ideology scale] | 3 |
| 68 | 24 and 44 [gendered views of nursing careers scale] | 0 |
| 69 | 25 and 44 [femininity score] | 3 |
| 70 | 26 and 44 [sex-typed behaviors and attitudes score] | 0 |
| 71 | 27 and 44 [masculine gender score] | 2 |
| 72 | 28 and 44 [gender self-report] | 2 |
| 73 | 29 and 44 [masculine measure] | 0 |
| 74 | 30 and 44 [self-perceived gender expression] | 1 |

Search History (note: requires UHN login to re-run the search): <https://uhn.idm.oclc.org/login?url=http://ovidsp.ovid.com/ovidweb.cgi?T=JS&NEWS=N&PAGE=main&SHAREDSEARCHID=sjKlKQ9dwwhJrISbDH1GwsFE2RT323zuzcoLtLHVBgHvKVHZoQy4DPWgQMpVzLo5>

## Search Results

* Results provided as separate Word documents. Measures that had 0 results are highlighted in orange.

| **#** | **Measure** | **# of results** |
| --- | --- | --- |
| 1 | Bem Sex Inventory | 69 |
| 2 | Conformity to Masculine Norms Inventory | 14 |
| 3 | Personal Attributes Questionnaire | 20 |
| 4 | Masculine Role Norms Inventory / Male Role Norms Inventory | 6 |
| 5 | Gender Equitable Men Scale | 9 |
| 6 | GENESIS-PRAXY | 6 |
| 7 | Gender Role Conflict Scale | 9 |
| 8 | Attitudes Toward Women Scale | 3 |
| 9 | Masculine Gender Role Discrepancy Stress Scale | 0 |
| 10 | Lifelines Gender Index | 2 |
| 11 | Gender Role Index | 0 |
| 12 | GOING-FWD | 2 |
| 13 | Conformity To Feminine Norms Inventory | 2 |
| 14 | Drive For Muscularity Scale | 32 |
| 15 | Marianismo Beliefs Scale | 1 |
| 16 | Masculinity In Chronic Disease Inventory | 4 |
| 17 | Normative Male Alexithymia Scale | 2 |
| 18 | Male Role Attitudes Scale | 1 |
| 19 | Gender Climate Scale | 1 |
| 20 | Gender Role Orientation Scale | 2 |
| 21 | Macho Scale | 0 |
| 22 | Minnesota Multiphasic Personality Inventory | 1,184 |
| 23 | Femininity Ideology Scale | 3 |
| 24 | Gendered Views of Nursing Careers Scale | 0 |
| 25 | Femininity Score | 3 |
| 26 | Sex-typed Behaviors and Attitudes Score | 0 |
| 27 | Masculine Gender Score | 2 |
| 28 | Gender Self-Report | 2 |
| 29 | Masculine Measure | 0 |
| 30 | Self-Perceived Gender Expression | 1 |
