# Supplementary material for: Systematic review of instruments for measuring sex and gender attributes: Assessment of measurement properties and utility in research on clinical and functional outcomes
Source: Research Square preprint supplement (doi:10.21203/rs.3.rs-7754711/v1), 2025-10-15
Supplement: Supplementary file 2 [file 4d07a565f21741a4a877b692.docx]

Quality score evaluation rubric for sex measures

| Criteria | 0 | 1 | 2 |
| --- | --- | --- | --- |
| Independent use by different teams | 0 peer-reviewed studies by independent research teams (developed in = used in) | 1 peer-reviewed study by independent research teams | ≥2 peer-reviewed studies by independent research teams |
| Sufficient information for appraisal/replication (items, scoring, admin details, access) | Insufficient details (not open access) | Partial details (e.g., scoring but not items) | Full details (items/scales available or clearly referenced; scoring; administration; permissions) |
| Sensitivity, specificity & reproducibility in relevant populations and with clinical/functional outcomes | No sensitivity, specificity & reproducibility reported | Partial (some psychometrics, limited outcome linkage or population mismatch) | Evidence of sensitivity (≥ 90% is for predictive/ predictive assay, ≥ 95% used to rule out high-risk disease, low LOQ), specificity (80–90%) & reproducibility (intra-measure CV ≤ 10%, inter-measure CV ≤ 15%) and links to clinical/functional outcomes in the population of use |
