# Supplementary material for: Systematic review of instruments for measuring sex and gender attributes: Assessment of measurement properties and utility in research on clinical and functional outcomes
Source: Research Square preprint supplement (doi:10.21203/rs.3.rs-7754711/v1), 2025-10-15
Supplement: Supplementary file 3 [file 5dfd8f70a495183b6094a176.docx]

| 1. Measure 2. Country of development/countries of utility 3. Purpose of development (predictive, descriptive, evaluative); purpose of utility | Frequency of use by diff research teams/ frequency of use by same research team | 1. Cost/no cost, details for critical evaluation/replication 2. Endorsement by EMERGE | Measurement properties in instrument’s validation studies   1. Reliability:    1. internal consistency/sample    2. test-retest reliability/sample    3. measurement error   2) Hypothesis-testing (construct validity)/sample  3) Structural validity/sample  4) Researchers notes | Quality score (independent use score + sufficient information for appraisal/replication score + validity and reliability score) |
| --- | --- | --- | --- | --- |
| 1. Attitudes Towards Women Scale full version (ATWS) 2. USA[1] / Switzerland [2] 3. Evaluating attitudes toward roles, rights of women (descriptive) [1]/ examine GRA in relation to alcohol consumption (predictive) [2] | 1/0 | 1. Full version not available for free download, available through institutional access in book *Masculinity and femininity : their psychological dimensions, correlates, and antecedents*   25 item freely available online: <https://emerge.ucsd.edu/r_22vvh5psjgfydx2/>   1. Given for short version (25 item)   Psychometric score: medium  Ease of use score: no data | 1. (a) 55-item α = 0.92/ female students, mothers, grandmothers [3]   (b) 55 item: 0.89 – 0.95/ adults across class and sex groups in USA[3]  (c) NR   1. Short form strongly correlated with full form (r ≥ 0.95)/ students, mothers, fathers [4]; feminist group members had sig higher score = valid measure of feminist attitudes[5] 2. NR 3. Multiple versions validated in intergenerational samples (students, mothers, fathers grandmothers) [3,4] | 1+ 0 + 1 = 2 |
| 1. Attitudes Towards Women Scale (ATWS), 15 item 2. USA [1]/USA [6] 3. Evaluating attitudes toward roles, rights of women (descriptive) [1]/ examine sex role orientation & involvement in child-oriented activities (predictive) [6] | 1/0 | 1. No cost, can be obtained online at: <https://www.wcasa.org/wp-content/uploads/2020/05/Evaluation_17.-aws.pdf> 2. NR | 1. (a) α = 0.85, Spearman-Brown split half = 0.8 / female students, mothers, grandmothers in USA [3]; α = 0.81/ Turkish uni students [7]   (b) 0.86/ female students, mothers, grandmothers in USA [3] 0.82/males in USA [3]  (c) NR   1. Corr btwn ATWS and BRSI Fem subscale r=0.41, p < .01/Turkish uni students [7] 2. CFI = .87, RMSEA = .08/ Turkish uni students [7] 3. Validated in intergenerational samples (students, mothers, fathers grandmothers) [3,4] | 1+1+2 = 4 |
| 1. Bem Sex Role Inventory (BSRI) 2. USA[8] / Canada [9–12], USA [13], UK [14,15] , Ireland [16], China [17], Brazil, Albania, Colombia [12], South Africa [18] 3. To assess self sex-role identification (masculinity, femininity, androgyny) [8]; (descriptive)/ assoc btwn GR & MH [9,10,12–14,17], CHD mortality ,[15] SSD [18], nursing course completion [16], chronic pain [11](predictive) | 7/2 | 1. No cost; can be obtained online at: <https://psytests.org/trait/bsrien.html> (computerized)   <https://emerge.ucsd.edu/r_1lsgbxgaam65ze3/>   1. Psychometric score: high   Ease of use score: medium | 1. a) α = 0.77 for femininity, α = 0.78 for masculinity, α = 0.47 androgyny/ older adults [19]; SB = 0.86 for masculinity, 0.82 for femininity, 0.77 for androgyny/NYC males at drug abuse rehab[20]   b) r=0.90 masculinity & femininity, r=0.93 androgyny, r=0.89 soc desirability/intro psych uni students[8]  c) 42.3% discrepancy in categorizations between original t-ratio and new median-based scoring[21]   1. KMO=0.9/ MSM[22]; ES for GR attitudes= -0.03/people with eating disorders [23]; 12-item KMO = 0.77/ Spanish older adults[24]; 51% masculine/ethnically diverse males, 55% feminine/ ethnically diverse females[25] 2. CFI=0.96/graduate and undergraduate students [26], Corr btwn fem and masc scales = -0.19/ heterosexual men, -0.17/gay men[27] 3. Captures Western notions of gender roles[21]; Would be prudent to examine underlying factor loading [28] | 2+ 2+ 2 = 6 |
| 1. Conformity to Feminine Norms Inventory (CFNI) 2. USA [29]/USA [30] 3. Assess women’s conformity to fem norms (descriptive) [29]/examine conformity as predictor of ED (predictive) [30] | 1/0 | 1. No public access, not available for direct, free download or in supplement 2. NR | 1. (a) median α = .78, range α = .69-.92 /racially diverse USA undergraduate women [31]   (b) r = .82, over 2-3 weeks/ racially diverse USA undergraduate women [31]  (c) Adjusted validity correlations using correction for attenuation due to measurement error following recommendations for correcting for measurement unreliability in validity testing)/ racially diverse USA undergraduate women [31]; 30 surveys missing over one third of items, 31 missing at least 20% of data on one or more measures of interest. Data appeared to be missing at random/ racially diverse USA undergraduate women [31]   1. Corrected subscale corr: range r= .49-.93, median r= .68/ racially diverse USA undergraduate women [31] 2. Nine-factor model: CFI = .90; RMSEA = .04, 90% CI [.04, .05]/ racially diverse USA undergraduate women [31] 3. Shows acceptable reliability, validity, and invariance across White women and women of color; supported as multidimensional tool for research and clinical use [31] | 1+ 0 + 1 = 2 |
| 1. Conformity to Masculine Norms Inventory (CMNI); 2. USA [32]/ USA [33], Australia [34], UK [35] 3. Assess men’s conformity to masc norms (descriptive) [32] /relationship of masc norms w depr [33,35], TBI rehab outcomes [34] (predictive) | 3/0 | 1. Original paper available to researchers; items available online at: <https://scales.arabpsychology.com/s/conformity-to-male-norms-inventory-cmni/> 2. NR | 1. (a) α = 0.86/ gay men in USA [36]; CMNI-46: α = 0.83/adult men [37]; CMNI-55: α = 0.84; CMNI-29: α = 0.68-0.91/young Brazilian men [38]; α = 0.87/undergraduate men in US & other countries, α = 0.75/ men in US & other countries from other levels of study; α = 0.85/ married or partnered men in US & other countries, α =0.68/single men in US and other countries [38]   (b) r btwn pub year and total reliability score = -0.37/ ethincally diverse men inside and outside US across age groups[38]; CMNI-46 more consistent for White participants/ Asian and White American college men [39]  (c) inter-item correlation of .09 will affect alpha coefficients and subsequently increase measurement error/ adults attending counseling in USA[40]   1. Convergent validity: CMNI-29 AVE = 0.42-0.78/ young Brazilian men; corr btwn CMNI-46 and 29 subscale estimates: r=0.91 to 1.00/ Asian and White American college men [39]; 2. CFI=0.92, TLI=0.92/gay men in USA [36]; CFI=0.82/ Asian and White American college men [39]; CMNI-55: CFI=0.88/adults attending counseling in USA [40]; interitem correlation: CMNI-55 = 0.09/ adults attending counseling in USA [40] 3. Researchers should be mindful of sample characteristics that may attenuate correlations and the potential number of items needed to truly capture a global measure of masculinity. Participants may not interpret the items   as a single construct of masculinity [40]. | 2 + 1 + 1 = 4 |
| 1. CMNI-22 2. USA [40]/Australia [41,42] 3. Assess men’s conformity to masc norms [40](descriptive)/assess harmful norms relationship to poor MH [42] and health literacy [41] (predictive) | 0/2 | 1. Available for download after subscription: <https://www.scribd.com/document/591076517/The-Conformity-to-Masculine-Norms-Inventory-22> 2. NR | 1. (a) α = 0.70, 0.74 (time 1 & 2)/ French-Canadian adult males [43]; α = 0.67 / adults attending counseling in USA [40]; α =0.44-0.81/ Australian adult males in workforce [42]   (b) r = 0.90/ French-Canadian adult males  (c) interitem correlation of .09 for will affect alpha coefficients and subsequently increase measurement error/ adults attending counseling in USA [40]   1. r btwn CMNI-22 & MRNI-SF = 0.70, 0.71 (time 1 & 2)/French-Canadian adult males [43]; interitem correlation = 0.08/ adults attending counseling in USA [40] 2. RMSEA = .13 (.12-.14; 90% confidence interval), CFI = .26/ adults attending counseling in USA [40] 3. Certain masc norms have been deemed politically incorrect (e.g., being a playboy), illegal (e.g., violence), could lead to social desirability bias [43] | 1 + 0 + 2 = 3 |
| 1. Drive for Muscularity Scale (DMS) 2. Canada [44]/ USA [45] 3. Measure muscularity oriented attitudes and behaviors (descriptive) [44]/assoc btwn late pubertal timing & drive for muscularity (descriptive) [45] | 1/0 | 1. Freely available online:   <https://spartan.ac.brocku.ca/~dmccreary/Drive_for_Muscularity_Scale.html>   1. Psychometric score: medium   Ease of use score: high | 1. (a) α = 0.89/male uni students in Buenos Aires [46]/ α =0.88/male uni students in Mexico [47]   (b) corr btwn MB subscale time 1 and 2 = 0.84, corr btwn MBI subscale time 1 and 2 = 0.73 (6 wks) /male uni students in USA [48]  (c) Item 14 asks about whether respondent thinks their chest is not big enough – girls may interpret this in regards to breasts [44]   1. CV= 0.92, 0.71, DV=0.19/male uni students in Buenos Aires[46]; KMO= 0.86/male uni students in Mexico [47] 2. CFI= 0.99, RMSEA = 0.049/male uni students in Buenos Aires [46]; CFI= 0.98, RMSEA = 0.04/ male uni students in Mexico [47] 3. Research has suggested that the subscales of the DMS be investigated separately (MBI and MB) [48] | 1 + 2 + 1 = 4 |
| 1. Feminine Ideology Scale (FIS) 2. USA [49]/ USA [50] 3. Deg of endorsing traditional fem ideology (descriptive) [49]/relation of trad masculinity to suicide (predictive) [50] | 1/0 | 1. Freely available online:   <https://emerge.ucsd.edu/r_ciag6s920micp4l/>   1. Psychometric score: high   Ease of use score: high | 1. a) Total α = .92/ female USAundergraduates [49]; total α = .93/ male USAundergraduates [49]   b) NR  c) Small effect sizes (dMACS = 0.043–0.448) for non-invariant items indicate minor measurement error across groups   1. KMO= .86/USA undergraduates [49]; corr btwn subscales and total r = .75 - .83[49] 2. Short form: CFI=.915, RMSEA=.165/community and college male & females[51]; CFI = 0.96, RMSEA = 0.06 [0.06, 0.06] / Black and White community dwellers and college students in USA[52] 3. Short form reliably measures traditional femininity ideology across Black and White participants, showing equivalent factor structure and metric invariance, though partial scalar non-invariance suggesting small response biases [52] | 1 + 1+ 1 =3 |
| 1. Femininity Score 2. UK [53]/ UK [53] 3. Promote epidemiological studies to explain variations in dx, outcomes not fully accounted for by sex (descriptive)/ same as development [53] | 0/0 (developed in = used in) | 1. Available in open access publication:   <https://doi.org/10.1038/s41598-022-05713-x>   1. NR | 1. a) NR   b) NR  c) NR  2) NR  3) RMSEA = 0.47~0.50/data from UK Biobank[53]  4) Due to the recent development of the tool and use in only one study, more research on the validity and reliability of the FS needs to be done | 0 + 1 + 0 = 1 |
| 1. Gender Role Conflict Scale (GRCS) 2. USA [54]/ Australia [34] 3. Assess men’s GR conflict patterns (descriptive) [54]/ link btwn masc role & TBI rehab outcomes (predictive) [34] | 1/0 | 1. GRCS-I available online at:   <https://emerge.ucsd.edu/r_1goo4iqgrwdsipv/>   1. Psychometric score: medium   Ease of use score: high | 1. a) 37-item: α = 0.868/ White, Black, and Asian male nursing students [55] α =0.93/, non-heterosexual White and racial minority men residing in the US [51]; 16-item: α = 0.77-0.80 for subscales/ White and racial/ethnic minority men residing in the US [52]   b) 4-week range = 0.72- 0.86 [51,53]  c) NR   1. GRCS-SF subscales corr w full-form subscales: r = 0.24 – 0.96/White and racial minority college men residing in the US [52]; intercorr btwn GRCS and subscales r= 0.31 – 0.83/ White, Black, and Asian male nursing students [50], non-heterosexual White and racial minority men residing in the US [51] 2. 37-item: CFI = 0.79, RMSEA=0.06/gay men; CFI= 0.82/non-heterosexual White and racial minority men residing in the US [51]; 16 item: CFI = 0.96, TLI = 0.96, RMSEA=0.057/ heterosexual and non-heterosexual White and racial/ethnic minority men [52] 3. Assumed that research w no data on sexual orientation was reported involved predominately heterosexual men. Explanatory power of findings is limited by previous research. Researchers need to regularly assess participants’ sexual orientation/ heterosexual and non-heterosexual White and racial/ethnic minority men[52] | 1+2+ 1 = 4 |
| 1. Gender Self-Report (GSR) 2. USA [54]/ USA [55] 3. capture gender experience, (identity, presentation, preferences, interests) (descriptive) [54]/ assoc btwn PGS, GD, and MH (predictive) [55] | 1/0 | 1. Freely available online: <https://osf.io/f7qeh?view_only=a0190df0087e4e98a0d0fbebe946c94a> 2. NR | 1. a) empirical reliability coefficients (EAP-based): FMC= .87, BGD= .85, NGD= .75; Summed score reliabilities: FMC=.87, BGD= .87, NGD= .73/GD youth and young adults from USA [54]   b) NR  c) 0.81% of items missing/ GD youth and young adults from USA [54]   1. 26/30 hypotheses supported/ GD youth and young adults from USA [54] 2. RMSEA = .06; CFI = .99; TLI = .99 / GD youth and young adults from USA [54] 3. Strong structural and robust construct validity (26/30 hypotheses confirmed, including identity-group differences and convergent correlations), though test–retest reliability was not reported [54] | 1+2+ 1 = 4 |
| 1. Gendered Views of Nursing Careers Scale 2. UK [56]/ UK [12] 3. nursing students’ perceptions of gender appropriateness of nursing careers (descriptive) [56]/ how views relate to nursing course completion (predictive) [12] | 1/0 | 1. Available in open-access publication:   <https://doi.org/10.1046/j.1365-2648.2003.02676.x>   1. NR | 1. (a) a = 0.81/male and female nursing students residing in the UK[12]   b) NR  c) NR   1. NR 2. NR 3. Future research would benefit from longitudinal design tracing students’ career choices over time. Small number of men in the sample, although representative of male participation in nurse education, limited the number of men with psychologically feminine gender role orientation [56] | 1+ 1+ 1 = 3 |
| 1. Gender Equitable Men (GEM) Scale 2. Brazil [57]/Jamaica [58] 3. Capture attitudes toward equitable vs. inequitable GN (descriptive) [57]/assoc btwn support for ineq GR & FP behaviors (predictive) [58] | 1/0 | 1. Original scale and most widely used version are freely available to the public:   <https://genderhealthdata.org/wpcontent/uploads/gravity_forms/scale-repository-PDFs/Gender-Equitable-Men-GEM-Scale.pdf>   1. NR | 1. (a) λ = 0.88/ adults ages 18-49 in rural South Africa [59]; α= 0.81/Brazilian men ages 15-24[62] ; Θ = 0.87, α = 0.78/ M and F 15-24 yrs living in Uganda [65]   (b) NR  (c) std. error ranges on GEM scale score assoc w HIV risk factors: 0.19 – 0.45/ M and F 15-24 yrs living in Uganda [65]   1. Neg assoc btwn supporting gender equitable norms and violence, pos assoc btwn supporting gender equitable norms and education, contraceptive use/ Brazilian men ages 15-24 [62] 2. RMSEA = .0031; CFI = .97, TLI = .96 /M and F 15-24 yrs living in Uganda [65] 3. Showed high internal consistency, but factor analysis did not confirm original structure, instead supporting a reorganized multi-factor model that improves validity and interpretability/geriatric population [66] | 1+ 1 + 1 = 3 |
| 1. GENESIS- PRAXY Gender Index 2. Canada, USA, Switzerland [67]/ Canada, Austria [63] 3. calculate gender scores in patients hospitalized for premature ACS (descriptive) [62]/ assoc btwn sex, gender, and CVH (predictive) [63] | 1/0 | 1. Not directly available for free download, available through academic or institutional access 2. NR; however endorsed by CIHR: https://cihr-irsc.gc.ca/e/51310.html | 1. (a) NR   (b) NR  (c) NR   1. Spearman correlation btwn gender score and sex r= 0.62, c statistic = 0.9 / ACS pts =<55 yrs residing in USA, Canada and Switzerland [64] 2. NR 3. Selection of variables representing the four aspects of gender is arbitrary. Biological sex used as dependent variable in logistic regression analyses/ ACS pts =<55 yrs residing in USA, Canada and Switzerland [64] | 1+ 0 + 1 = 2 |
| 1. Macho Scale 2. Jamaica [65]/ Jamaica [58] 3. measure masc identity and gender relations in the Caribbean (descriptive) [65]/ assoc btwn support for ineq GR & FP behaviors (predictive) [58] | 1/0 | 1. Freely available online:   <https://emerge.ucsd.edu/r_wol7aymhc2smdnh/>  As supplement to open access publication:  <https://www.researchgate.net/publication/279902167_Measuring_masculinity_in_an_afro-caribbean_context>   1. Psychometric score: high   Ease of use score: low | 1. a) = 0.74/Outpatient men aged 19-54 residing in west Jamaica [58];  = 0.816, = 0.75 (Dominance and Virility subscale),  = 0.72 (Primordial Need to Have Children)/ Afro-Caribbean men residing in Jamaican communities [65]   b) NR  c) NR   1. Corr btwn subscales, r = 0.531/ Afro-Caribbean men residing in Jamaican communities [65] 2. NR 3. Developed among Jamaican men 18-59 years old based on common beliefs about masculinity held there, which might limit applicability [65] | 1 + 1 + 1 = 3 |
| 1. Male Role Attitudes Scale (MRAS) 2. USA [53]/ UK 3. Assess endorsement of traditional masc ideology (descriptive) [53]/ adherence to masc norms assoc w attitudes towards seeking professional psychological help (predictive) [66] | 1/0 | 1. Freely available online:   <https://emerge.ucsd.edu/r_2sfe42ld69twpdi/>  Available in publication through institutional access:  <https://doi.org/10.1007/BF01420798>   1. Psychometric score: low   Ease of use score: high | 1. (a) α = 0.67/ adult males residing in UK [66]   (b) NR  (c) Self-report measures susceptible to social desirability, lying, and fatigue/adult males residing in UK [66]   1. Intercorr btwn MRAS and ATWS 0.45-0.55 /college students residing in USA [53] 2. NR 3. Because MRAS is a multi-item scale, it may be a more reliable indicator of attitudes toward male roles (i.e., a higher proportion of observed variance is interpretable as "true" as opposed to error variance) than are the single item measures of attitudes toward women and attitudes toward gender roles and relationships [53]. | 1 + 1 + 1 = 3 |
| 1. Masculine Gender Role Discrepancy Stress Scale (MGRDSS) 2. USA [67]/ Australia [68], China [69] 3. assess men’s GR discrepancy stress (descriptive) [67]/ assoc btwn masc discrepancy stress & muscle dysmorphia, MH (predictive) | 2/0 | 1. Available as a supplement to open access publication: <https://pmc.ncbi.nlm.nih.gov/articles/PMC6816038/> Subscales freely available online:   Discrepancy Stress Scale  <https://emerge.ucsd.edu/r_uvzb1ediiqvv4bz2/>  Masculine Gender Role Stress Scale <https://emerge.ucsd.edu/r_vjutxpqfaoowvmv/>   1. Subscales rated separately:   Discrepancy Stress Scale:  Psychometric score: medium, Ease of use score: high  Masculine Gender Role Stress Scale:  Psychometric score: high Ease of use score: NR | 1. a) Discrepancy subscale a = 0.91, Discrepancy Stress subscale a = 0.86/ men aged 18-50 residing in USA [70]   b) NR  c) removed all respondents who were more than 2.5 SDs from mean time to complete the survey/ men aged 18-50 residing in USA [70]   1. Two subscales found to be positively correlated, r = 0.61, KMO=0.91/men aged 18-50 residing in USA[70] 2. Eigenvalue analysis indicated three factors with values greater than one explaining approximately 56 % of the variance/men aged 18-50 residing in USA 3. Self-report measures may not accurately reflect participants’ real-world behaviours and prevalence. Large portion of sample was homogenous both ethnically and in terms of sexual orientation, limiting generalizability of findings and applicability to diverse communities [67]. | 2 + 1 + 1 = 4 |
| 1. Masculine Gender-Score (MGS) 2. USA, Netherlands/ USA, Netherlands [71] 3. Assess how masculinity may affect sex differences in prevalence of CHP (predictive) [71] | 0/0 (developed in = used in) | 1. Available in publication through academic or institutional access 2. NR | 1. a) NR   b) NR  c) use of self-reported measures might have generated biased information since it requires a certain level of literacy [71]   1. Total score on avg higher in men (M = 12.2, SD = 2.5) than women (M = 9.1, SD = 2.4) / adults 40-80 yrs residing in the Netherlands [71] 2. NR 3. The Masculine Gender-Score used masculine connotated aspects of everyday life that are not necessarily feminine-typed aspects. A mainly Caucasian population of middle and old age, and residing within a specific - not highly urbanized - region was used. In addition, those with severe diseases and worse health are under-represented in such studies. [71] | 0 + 0 + 1 = 1 |
| 1. Masculine Measure 2. Zimbabwe [72]/ Zimbabwe [72] 3. Establish individual-level determinants of masc norms & implications for HIV prevention, treatment (predictive)/same as development purpose [72] | 0/0 (developed in = used in) | 1. Available as supplement to publication through academic/institutional access 2. NR | 1. a) NR   b) NR  c) NR   1. NR 2. CFI: 0.816, TLI: 0.775, RMSEA: 0.065/ males in Zimbabwe [72] 3. Statistics were determined to be a borderline good fit1. Response scale only had 2 options (agree, disagree). Only applicable to men 15-54 years old from east Zimbabwe [72] | 0 + 0 + 1 = 1 |
| 1. Male Role Norms Inventory (MRNI) 2. USA [73]/ USA [44,74], Nigeria [75] 3. Measure endorsement of trad masc ideology (descriptive [73])/influence of trad masc endorsement on prostate related functioning over time (evaluative) [74], suicidal ideation (predictive [44], early cancer detection (predictive) [75] | 3/0 | 1. Freely available online:   <https://emerge.ucsd.edu/r_qajejmhjgwf63f3/>   1. Psychometric score: high   Ease of use score: high | 1. (a) total α = .94/ USA community and college men ages 18-72 [51]; α = .96/ USA undergraduates 18-51 yrs [76]   (b) NR  (c) NR   1. r = −.66 with MRAS (p < .001), r = .70 with CMNI-46 general (p < .001), r = .50 with GRCS-SF higher-order (p < .001), r = .13 with PAQ-M, r = .42 with NMAS/USA undergraduates 18-51 yrs [76]; corr of factors with total scale: r=0.59-0.90/men from USA undergraduates 18-51 yrs, r=0.64-0.90/women from USA undergraduates 18-51 yrs [76] 2. CFI = .94, TLI = .93, RMSEA = .033 [.031, .035]/ USA community and college men ages 18-72 [51]; 3. Construct validity supported using SEM with a bifactor model in a diverse male sample, showing strong latent correlations with external masculinity measures, concurrent validity for several specific factors (NTSM, IS, RE, T), but not for Dominance [51] | 2 + 2 + 1 = 5 |
| 1. Masculinity in Chronic Disease Inventory (MCD-I) 2. Australia/ Australia [77] 3. Measure of masculinity for men w chronic disease (descriptive)/same as development purpose [77] | 0/0 (developed in = used in) | 1. Available as a supplement to publication through academic or institutional access. 2. NR | 1. (a) α = .68–.93/ men 47-93 yrs w chronic disease residing in Australia [77]   (b) NR  (c) Error correlations were unconstrained only between within-factor item pairs with large residuals. These were between items: 18 and 14; 7 and 22; 7 and 14; 18 and 22; 12 and 3; 21 and 3; 12 and 19; 10 and 9; 19 and 9/ men 47-93 yrs w chronic disease residing in Australia [77]   1. Discriminant validity btwn ED and Optimistic Action (r = −.16, p < .001), Sexual Importance/Priority (r = −.52, p < .001), and Strength/Fitness (r = −.18, p < .001), factor corr r= .10 - .53/men 47-93 yrs w chronic disease residing in Australia [77] 2. 5 factor structure: 57% var exp, RMSEA = .08 (LO90 = 0.070; HI90 = 0.087); robust CFI = .90/men 47-93 yrs w chronic disease residing in Australia 3. Validated in 633 men with chronic disease, showing a 5-factor structure (57% variance explained), good–excellent reliability (α = .68–.93), and sensitivity to age and sexual health, supporting its use in gender-sensitized health interventions[77] | 0 + 0 + 1 = 1 |
| 1. Minnesota Multiphase Personality Index (MMPI-2) 2. USA [78]/ Sweden [79] 3. identification w stereotypical M and F GR (descriptive) [78]/ assoc btwn masc rank & mortality in conscripts (predictive) [79] | 1/0 | 1. Strictly licensed and can only be purchased, administered and interpreted by a suitably experienced clinical psychologist or psychiatrist through [Pearson Assessments](https://www.pearsonassessments.com/en-us/Store/Professional-Assessments/Personality-%26-Biopsychosocial/Minnesota-Multiphasic-Personality-Inventory-3/p/P100000004?tab=product-details) 2. NR | 1. (a) a=0.80/ female uni students residing in Kuwait[80]; 0.79 GF, 0.82 GM/USA undergraduates [81]   (b) MF scale correlates similar to those established in 1950s/undergraduates [82]  (c) NR   1. MMPI-A ES= -0.81/males in juvenile detention centre in USA [83]; corr with BSRI and SRBS = 0.35-0.47[81] 2. NR 3. item validity should be studied when tests developed in one culture are to be used in another culture, since they may attach different meanings to particular items[80]; can only be administered by experienced clinical psychologist or psychiatrist, should be regarded as complex descriptive investigation for relatively infrequent use[84]. | 1 + 0 + 1 = 2 |
| 1. Normative Male Alexithymia Scale (NMAS) 2. USA [85]/ UK [66] 3. assess normative M alexithymia (descriptive) [85]/ assoc btwn normative M alexithymia & attitudes towards seeking professional psychological help (descriptive) [66] | 1/0 | 1. Not available for direct, free download. Available as a supplement to publication through academic or institutional access. 2. NR | 1. (a) α= .80/males 19-73 yrs residing in USA [86]   b)1-2 mos: r=0.91/men residing in USA, r=0.82/women residing in USA [85]  c) 0.2% to 0.6% missing responses per item/males 19-73 yrs residing in USA [86]; Limitations related to self-report and socially desirable responding [86]   1. r btwn NMAS-BF + TAS-20 alexithymia latent factor: .57, p< .001/males 19-73 yrs residing in USA3 2. KMO=.933; CFA- IRT based: Best fit- CFI .978; TLI .963; RMSEA .063 (90% CI [.016,.105]; SRMR .030/males residing in the USA[86]; factor loadings .40-.85/males 19-73 yrs residing in USA[86] 3. Unidimensional structure (IRT model best fit), good reliability, and convergent, concurrent, and incremental validity beyond TAS-20 in predicting restrictive emotionality [86] | 1 + 0 + 2 = 3 |
| 1. Personal Attributes Questionnaire (PAQ) 2. USA [87]/ USA [6,88,89] 3. Measure masculinity and femininity characteristics (descriptive) [87]/ relationship b/w masc & social support w recovery from MI [88], involvement in child-orented activities [6,89], interpersonal functioning in med school [89] (predictive)[90] | 3/0 | 1. Freely available online:   <https://emerge.ucsd.edu/r_1qjinjliggbfm9h/>   1. Psychometric score: medium   Ease of use score: low | 1. (a) α= 0.79 masc, α = 0.71 fem, ω = 0.76 masc, ω= 0.71 fem/ German individuals with min. age of 14 ; α= .79 masc, α= .87 fem, α= .63 masc-fem/ USA undergraduate students [91]; All subjects: α= 0.91 GD, α= 0.89 CG, α= 0.81 men GD, α= 0.82 men CG, α= 0.80 women GD, α= 0.80 women CG/ Undergraduate psychology students residing in USA [92]   (b) NR  (c) lower reliability than BSRI due to erroneous scoring/ USA undergraduates [91]   1. Corr btwn BSRI and PAQ E = .77 for men, 0.76 for women; 6 out of 9 convergent validity coeff >0.60/ USA undergraduates [91] 2. PCA: 2 components with 57.7% var exp, component loads: fem- 0.71 – 0.72, masc – 0.73 – 0.79, CFA: χ²(19) = 90.49, p < 0.001, CFI = 0.97, RMSEA = 0.05 [CI: 0.04–0.06], SRMR = 0.03, Correlation between scales: r = 0.44/ German individuals with min. age of 14 [90] 3. Confirmed two-factor structure (masculinity and femininity) with moderate correlation; demonstrated acceptable reliability and internal consistency; supported by evidence of construct and convergent validity through associations with related gender and personality measures [92]. | 2 + 1 + 1 = 4 |
| 1. Self- Perceived Gender Expression (W5) 2. USA [93] / USA [94] 3. self-report measure of current socially assigned GE (descriptive) [93]/assoc btwn GE & MH (predictive) [94] | 1/0 | 1. Scale available through open access publication: <https://link.springer.com/article/10.1007/s11199-010-9798-y/tables/4> 2. NR | 1. (a) Cohen’s K = 0.51/ adults 18-30 residing in Boston, USA [93]   (b) NR  (c) NR   1. Corr btwn appearance and mannerisms: Spearman r0 = .74, p < .0001/ non-transgender females from adults 18-30 residing in Boston, USA [93]; Spearman r0 = .68, p = .0002/ non-transgender males from adults 18-30 residing in Boston [93]; Spearman r0 = .39, p = .11/ transgender participants from adults 18-30 residing in Boston, USA [93] 2. NR 3. Revised both items to include the qualifier “on average” in the item stem to mitigate uncertainty caused by within-person variation in gender expression and removed gender-specific pronouns [93] | 1 + 2 + 1 = 4 |
| 1. Sex-Typed Behaviors and Attitudes Score 2. USA[95] / USA [96] 3. construct sex-typed behaviors, attitudes score from prob that adolescent is M or F [95](descriptive)/ influence of gender normative attitudes, behaviors on rates of suicidal ideation in youth [96] (predictive) | 1/0 | 1. Available as supplement to publication through academic or institutional access 2. NR | 1. a) NR   b) NR  c) NR   1. Correctly discriminated btwn randomly chosen girl and boy 81.7% of time/White and racial minority adolescent students residing in the US [95] 2. RMSEA = 0.0021/ White and racial minority adolescent students residing in the US [95] 3. Cronbach’s alpha is appropriate measure of reliability for scales using multiple items to assess single domain, this uses measures from multiple domains. Initial selection of items considered for inclusion in sex-typicality measure was not chosen based on a specific sampling strategy - representativeness of M and F behaviors and attitudes cannot be guaranteed [95] | 1 + 0 + 1 = 2 |

[Scoring Methodology – EMERGE](https://emerge.ucsd.edu/scoring-methodology/)

Abbreviations: **ACS**, acute coronary syndrome; **assoc**, association; **AVE**, average variance extracted; **ATWS**, Attitudes Towards Women Scale; **BGD**, Behavioural Gender diversity; **BSRI**, Bem Sex Role Inventory; **Btwn**, between; **CFI**, Comparative fit index; **CHP**, chronic health problems; **CI**, confidence interval; **CMNI**, Conformity to Masculine Norms Inventory; **Corr**, correlation; **CV**, construct validity; **CVH**, Cardiovascular health; **DMS**, drive for muscularity scale; **dMACS**, differential item functioning via Mean and Covariance Structures; **DV**, discriminate validity; **ED**, eating disorder; **F**, female; **FMC**, Family/mother connectedness; **FP**, family planning; **GE**, gender expression; **GD**, gender diversity; **GR**, gender roles; **GRCS-SF**, Gender Role Conflict Scale Short Form; **Intercorr**, intercorrelation; **IRT**, item response theory; **ineq**, inequitable; **KMO**, Kaiser-Meyer-Olkin measure; **masc**, masculinity/masculine; **M**, male; **MB**, Masculinity Behaviors; **MBI**, Masculinity beliefs inventory; **MH**, mental health; **MMPI**, Minnesota Multiphase Personality Index; **MSM**, measure of sampling adequacy; **MRAS**, Masculine Role Attitudes Scale; **MRNI**, Male Role Norms Inventory; **MRNI-SF**, Male Role Norms Inventory Short Form; **NGD**, Nonconforming Gender diversity; **Neg**, negative; **NR**, not reported; **PAQ**, personal attributes questionnaire; **PGS**, polygenic score; **pos**, positive; **pts**, patients; **RMSEA**, Root Mean Square Error of Approximation; **SD**, standard deviation; **SEM**, Structural Equation modeling; **std. error**, standard error; **TAS-20**, Toronto Alexithymia Scale-20 items; **TLI**, Tucker-Lewis Index; **w**, with; **wk**, week; **yrs**, years

Symbols: **α** = Cronbach’s alpha, **λ** = Guttman’s lambda coefficient, **Θ** = ordinal theta, **r** = correlation
