# Supplementary material for: Systematic review of instruments for measuring sex and gender attributes: Assessment of measurement properties and utility in research on clinical and functional outcomes
Source: Research Square preprint supplement (doi:10.21203/rs.3.rs-7754711/v1), 2025-10-15
Supplement: Supplementary file 4 [file 68b69f6bbf0acf0be5252b08.docx]

**Measures capturing attributes of biological sex**

Contents

[Testosterone levels (total testosterone (TT) and calculated free testosterone (cFT) 2](#_Toc210121355)

[Semen Quality Score (DI-SQ) 4](#_Toc210121356)

[Prostate Health Index 7](#_Toc210121357)

[Serum Androgens & Androgen Receptors Function 9](#_Toc210121358)

[Gene Expression in Peripheral Blood Mononuclear Cells (PBMCs) (Sex-Differentiated Panel) 11](#_Toc210121359)

[Dehydroepiandrosterone Sulfate (DHEAS) Levels 13](#_Toc210121360)

[Sex Hormone Binding Globulin (SHBG) Levels 15](#_Toc210121361)

[Free Androgen Index 17](#_Toc210121362)

# **Testosterone levels (total testosterone (TT) and calculated free testosterone (cFT)**

| General characteristics | Biomarker name | Total Testosterone (TT); Calculated Free Testosterone (cFT)1,2 |
| --- | --- | --- |
| Source | Serum |
| Purpose | To assess androgen levels, diagnose hyper and hypogonadism |
| Unit of measurement | TT: ng/dL or nmol/L; cFT: pg/mL or pmol/L |
| First isolated/measured | 1935 by German chemists Adolf Butenandt and Leopold Ruzicka (independently); they received Nobel Prize in Chemistry (1939)3 |
| Measurement and acquisition | Sample type and collection method | Blood (serum), morning fasting sample preferred |
| Measurement technique or assay | TT: immunoassay; cFT: calculated via sex hormone-binding globulin and albumin levels (SHBG)  Liquid chromatography–tandem mass spectrometry (LC-MS/MS) preferred in persons with low TT levels4 (females, children, and transwomen) |
| Measurement conditions | Collected in early morning (8–10 AM); influenced by circadian rhythm (testosterone has a diurnal rhythm, with levels peaking in the early morning (~8–10 AM)  Standardizing the time of blood draw is critical  Fasting samples are preferred to minimize variability4 |
| Cost | $55 (TT and cFT combined)5 |
| Scoring, interpretation, reference ranges | Scoring method, quantification | TT: numerical values; cFT derived via Vermeulen equation6  Free Testosterone (mol/L) = [-b + sqrt (b2 +4a x T)] / 2a  Where:  a = kat + kt + (kat x kt) x (SHBG + Albumin – T)  b = 1 + kt x SHBG + kat x Albumin – (kat + kt) x T  kat = 3.6 x 104 L/mol; kt = 10 x 108 L/mol  T = testosterone in nmol/L; SHBG – in nmol/L; Albumin – in mg/dL;  Free Testosterone from mol/L to nmol/L, multiply by: 2.88 x 10-13 x 1.6 x 0.003448 |
| Reference range (normal/abnormal) | Please see here1,5 |
| Age-specific interpretation | Pubertal age: boys-TT rises sharply during puberty; girls small gradual rise during puberty;  Young adulthood (20-40 y.o) TT: males peak level; females stable  Males: gradual decline TT (~1% per year from 30s–40s onward); women: stable until menopause (~10–30% gradual decline from peak)  cFT raises and declines faster than TT1 |
| Clinical, functional relevance | cFT clinically relevant more than TT in older adults and in conditions with altered SHBG (e.g., obesity, liver disease)7 |
| Critical Appraisal | Strengths (sensitivity, specificity, reproducibility) | Sensitivity: TT and cFT are sensitive indicators of androgen deficiency /excess, particularly when symptoms are present (e.g., hypogonadism in males or hyperandrogenism in females).   - LOQ = ≤0.5 ng/dL/ men with infertility or sexual dysfunction10   Specificity: affected by factors unrelated to androgen function (obesity, liver disease, thyroid dysfunction, medications)  TT by immunoassay show poor reproducibility, especially at low concentrations (e.g., in women or children), due to cross-reactivity and limited assay sensitivity.   - AMR = 2-1200 ng/dL/ men with infertility or sexual dysfunction10   High reproducibility when measured via LC-MS/MS; cFT better reflects bioavailable hormone, especially when SHBG is altered   - CV ≤ 15%10; cut-off of 350 ng/dl should be used with LC-MS/MS for 2nd measurement11/ men with infertility or sexual dysfunction |
| Limitations (variability, confounding) | Affected by SHBG levels, age, and assay variability2,3,8, lifestyle factors, geography, genetics12 |
| Considerations for use (hormonal therapy, time of day) | High in males, low in females; critical in hypogonadism (men), PCOS (women), target for hormone therapy in transgender |
| Researchers’ Notes | cFT clinically relevant more than TT in older adults and in conditions with altered SHBG (e.g., obesity, liver disease)7 |
| Biological attributes captured | Sex-linked biological trait (reproductive function, androgyny, etc.) | Androgen status, male reproductive and metabolic health5 |

**Abbreviations: cFT** = calculated free testosterone**; LC-MS/MS** = liquid chromatography–tandem mass spectrometry; **SHBG** = sex hormone-binding globulin; **TT** = total testosterone

**References**

1. MD app. Determining Free and Bioavailable Testosterone. Assessed on April 29, 2025 at: <https://www.mdapp.co/free-and-bioavailable-testosterone-calculator-544/>
2. Nyamaah JA, Narinx N, Antonio L, Vanderschueren D. Use of calculated free testosterone in men: advantages and limitations. Curr Opin Endocrinol Diabetes Obes. 2024 Dec 1;31(6):230-235. doi: 10.1097/MED.0000000000000891. Epub 2024 Oct 9. PMID: 39445719.
3. Nieschlag E, Nieschlag S. ENDOCRINE HISTORY: The history of discovery, synthesis and development of testosterone for clinical use. Eur J Endocrinol. 2019 Jun 1;180(6):R201-R212. doi: 10.1530/EJE-19-0071. PMID: 30959485.
4. Keevil BG, Adaway J, Fiers T, Moghetti P, Kaufman JM. The free androgen index is inaccurate in women when the SHBG concentration is low. Clin Endocrinol (Oxf). 2018 May;88(5):706-710. doi: 10.1111/cen.13561. Epub 2018 Feb 26. PMID: 29405348.
5. Bhasin S, Brito JP, Cunningham GR, Hayes FJ, Hodis HN, Matsumoto AM, Snyder PJ, Swerdloff RS, Wu FC, Yialamas MA. Testosterone Therapy in Men With Hypogonadism: An Endocrine Society Clinical Practice Guideline. J Clin Endocrinol Metab. 2018 May 1;103(5):1715-1744. doi: 10.1210/jc.2018-00229. PMID: 29562364.
6. British Columbia Testosterone Testing – Protocol. Assessed April 24, 2025 at: https://www2.gov.bc.ca/gov/content/health/practitioner-professional-resources/bc-guidelines/testosterone-testing
7. Ho CK, Stoddart M, Walton M, Anderson RA, Beckett GJ. Calculated free testosterone in men: comparison of four equations and with free androgen index. Ann Clin Biochem. 2006 Sep;43(Pt 5):389-97. doi: 10.1258/000456306778520115. PMID: 17036414.
8. Shea JL, Wong PY, Chen Y. Free testosterone: clinical utility and important analytical aspects of measurement. Adv Clin Chem. 2014;63:59-84. doi: 10.1016/b978-0-12-800094-6.00002-9. PMID: 24783351.
9. Bikle DD. The Free Hormone Hypothesis: When, Why, and How to Measure the Free Hormone Levels to Assess Vitamin D, Thyroid, Sex Hormone, and Cortisol Status. JBMR Plus. 2020 Nov 2;5(1):e10418. doi: 10.1002/jbm4.10418. PMID: 33553985; PMCID: PMC7839820.
10. Wolken JK, Peterson MM, Cao W, Challoner K, Jin Z. Sensitive LC-MS/MS Assay for Total Testosterone Quantification on Unit Resolution and High-Resolution Instruments. J Clin Med. 2024 Nov 22;13(23):7056. doi: 10.3390/jcm13237056. PMID: 39685517; PMCID: PMC11641924.
11. D. Paduch, A. Bolyakov, A. Mielnik, J. Collazos, R.J. Lischer, P.N. Schlegel, Reproducibility of two morning total testosterone (TT) measurements using liquid chromatography-mass spectrometry (LCMS); clinical implications, Fertility and Sterility, Volume 106, Issue 3, Supplement, 2016, Page e80, ISSN 0015-0282, <https://doi.org/10.1016/j.fertnstert.2016.07.234>.
12. Trost, L. W., & Mulhall, J. P. (2016). Challenges in Testosterone Measurement, Data Interpretation, and Methodological Appraisal of Interventional Trials. The journal of sexual medicine, 13(7), 1029–1046. <https://doi.org/10.1016/j.jsxm.2016.04.068>

# **Semen Quality Score (DI-SQ)**

| General characteristics | Biomarker name | Sperm concentration and motility |
| --- | --- | --- |
| Source | Semen analysis1 |
| Purpose | To assess male’s fertility and reproductive capacity; **general marker** of testicular and epididymal function1 |
| Unit of measurement | Concentration: million/mL of semen; motility: % motile sperm that move actively and progressively (important for reaching and fertilizing the egg)1 |
| First isolated/measured | 1677 by Antonie van Leeuwenhoek (Netherlands), reporting “animalcules” (sperm cells) in a letter to the Royal Society; first systematic semen analyses for medical evaluation/fertility-focused in the 1920s by Dr Robert S. Hotchkiss and Dr John MacLeod (USA)2 |
| Measurement and acquisition | Sample type and collection method | Via ejaculation |
| Measurement technique or assay | Microscopy (manual) or computer-assisted semen analysis (CASA)1 |
| Measurement conditions | 2–7 days of sexual abstinence recommended before collection (optimal 2–5 days for best comparability)  Multiple semen samples (≥2) recommended, spaced at least 2–3 weeks apart, to confirm abnormal findings3  Keeping samples close to body temperature (~37°C) during transport  Delivery to lab ideally within 30–60 minutes4 |
| Cost | $100–200 (basic); up to $300 (with CASA and advanced morphology)5 |
| Scoring, interpretation, reference ranges | Scoring method, quantification | Comparisons to 2021 WHO criteria6 |
| Reference range (normal/abnormal) | ≥15 million/mL (concentration); ≥40% total motility |
| Age-specific interpretation | Highest in young adulthood; declines with age and comorbidities  Peak quality in young adulthood (around age 20–35)  Gradual decline after age 40:   - Decreased sperm concentration - Reduced motility and progressive motility - Increased sperm DNA fragmentation1,3 |
| Clinical, functional relevance | Male-only biomarker; essential for fertility assessment  Direct assessment of male reproductive potential; low values are associated with subfertility or infertility |
| Critical Appraisal | Strengths (sensitivity, specificity, reproducibility) | Sensitivity: Low semen concentration and motility are sensitive indicators of male subfertility, when values fall below WHO thresholds7   - Highest for predicting pregnancy at DI-SQ score >110 = 35.8; for predicting life birth = 39.0 / sperm donors10   Specificity: Moderate; abnormal semen parameters correlate with subfertility but do not confirm infertility (some males with poor semen parameters conceive)   - As predictor of pregnancy: DI-SQ score >120 pre-freeze = 93.4, >120 post-thaw = 99.1, >115 pre-freeze = 71.7, >115 post-thaw = 92.4, >110 pre-freeze = 35.1, >110 post-thaw = 71.2 / sperm donors10   Reproducibility: Low without standardization and repeated testing; daily and cyclical fluctuations in sperm production   - CV (volume) = 36%, CV (density) = 63%, CV (count) = 69%, CV (motility) = 36%, CV (TMC) = 82%/ male youth at risk for infertility8 |
| Limitations (variability, confounding) | Highly variable between samples from the same person (intra-individual variability); influenced by abstinence period, lifestyle, and temperature3 |
| Considerations for use (hormonal therapy, time of day) | Temperature and handling can impact motility results if not promptly processed (within 1 hour)  Multiple semen samples (≥2) recommended for accurate assessment |
| Researchers’ Notes | Abnormal semen parameters correlate with subfertility but do not confirm infertility (some males with poor semen parameters conceive)9 |
| Biological attributes captured | Sex-linked biological trait (reproductive function, androgyny, etc.) | Spermatogenesis, testicular function, male fertility |

Abbreviations: CASA = computer-assisted semen analysis; DNA = deoxyribonucleic acid; WHO = World Health Organization;

**References**

1. Sunder M, Leslie SW. Semen Analysis. [Updated 2022 Oct 24]. In: StatPearls [Internet]. Treasure Island (FL): StatPearls Publishing; 2025 Jan-. Available from: <https://www.ncbi.nlm.nih.gov/books/NBK564369/>
2. Amelar RD. Hotchkiss and MacLeod: an historical perspective. J Androl. 2006 Jul-Aug;27(4):494-501. doi: 10.2164/jandrol.05191. Epub 2006 Apr 5. PMID: 16598030.
3. Punjani N, Wald G, Al-Hussein Alwamlh O, Feliciano M, Dudley V, Goldstein M. Optimal timing for repeat semen analysis during male infertility evaluation. F S Rep. 2021 Jun 18;2(2):172-175. doi: 10.1016/j.xfre.2021.04.010. PMID: 34278350; PMCID: PMC8267395.
4. Nallella KP, Sharma RK, Aziz N, Agarwal A. Significance of sperm characteristics in the evaluation of male infertility. Fertil Steril. 2006 Mar;85(3):629-34. doi: 10.1016/j.fertnstert.2005.08.024. PMID: 16500330. RR
5. BC Publicly funded IVF Program. Grace Fertility. Assessed April 29, 2025 at: <https://fertilitywithgrace.com/pricing>
6. Luo X, Yin C, Shi Y, Du C, Pan X. Global trends in semen quality of young men: a systematic review and regression analysis. J Assist Reprod Genet. 2023 Aug;40(8):1807-1816. doi: 10.1007/s10815-023-02859-z. Epub 2023 Jun 19. PMID: 37335419; PMCID: PMC10371917.
7. Rosellen J, Dittmar F, Hauptmann A, Diemer T, Schuppe HC, Schagdarsurengin U, Fritzenwanker M, Wagenlehner F, Pilatz A. Impaired Semen Quality in Patients with Chronic Prostatitis. J Clin Med. 2024 May 14;13(10):2884. doi: 10.3390/jcm13102884. PMID: 38792425; PMCID: PMC11122295.
8. Christman, M. S., Kraft, K. H., Tasian, G. E., Zderic, S. A., & Kolon, T. F. (2013). Reproducibility and reliability of semen analysis in youths at risk for infertility. The Journal of urology, 190(2), 683–688. <https://doi.org/10.1016/j.juro.2013.02.030>
9. Kiran P. Nallella, Rakesh K. Sharma, Nabil Aziz, Ashok Agarwal, Significance of sperm characteristics in the evaluation of male infertility, Fertility and Sterility, Volume 85, Issue 3, 2006, Pages 629-634, ISSN 0015-0282, <https://doi.org/10.1016/j.fertnstert.2005.08.024>
10. Allamaneni SS, Bandaranayake I, Agarwal A. Use of semen quality scores to predict pregnancy rates in couples undergoing intrauterine insemination with donor sperm. Fertil Steril. 2004 Sep;82(3):606-11. doi: 10.1016/j.fertnstert.2004.02.113. PMID: 15374703.

# **Prostate Health Index**

| General characteristics | Measure’s name | Prostate Health Index (PHI)1-3 |
| --- | --- | --- |
| Source | Serum |
| Purpose | To identify clinically significant prostate cancer and aid in distinguishing prostate cancer from benign prostatic conditions1-3 |
| Unit of measurement | PHI composite score combining total PSA, free PSA, and [-2]proPSA |
| First isolated/measured | Beckman Coulter Inc., a US-based diagnostics company; the PHI test was first introduced in Europe in 2010, where it became available for clinical use. In the US, the Food and Drug Administration (FDA) approved PHI in June 20123,4 |
| Measurement and acquisition | Sample type and collection method | Serum sample; avoid ejaculation for 48 hours before testing; analyzed via immunoassay |
| Measurement technique or assay | Combination of total PSA, free PSA, and [-2]proPSA |
| Measurement conditions | Collected in early morning (8–10 AM) in fasting condition; influenced by circadian rhythm |
| Cost | $72-1305 |
| Scoring, interpretation, reference ranges | Scoring method, quantification | PHI = ([−2]proPSA / free PSA) × √total PSA |
| Reference range (normal/abnormal) | PHI >40 indicates elevated prostate cancer risk6,7 |
| Age-specific interpretation | Male-specific; most relevant for males >50; PSA and PHI levels increase with age due to BPH4 |
| Clinical, functional relevance | Used to assess prostate cancer risk; informs biopsy decisions; reduces false positives from benign prostate changes |
| Critical Appraisal | Strengths (sensitivity, specificity, reproducibility) | Sensitivity: PHI 24 or greater = 91.8% (validation sample)/ biopsy naïve males12  Specificity: Higher than PSA alone   - PHI 24 or greater = 30% (validation sample)/ biopsy naïve males12   Reproducibility: Good with commercial kits |
| Limitations (variability, confounding) | Cost; influenced by benign prostate conditions, genetic polymorphism8,9 |
| Considerations for use (hormonal therapy, time of day) | Hormonal therapy can significantly impact PSA levels and should be taken into account when interpreting PHI results10.  PSA has a rhythm based on the time of the day i.e., a diurnal rhythm; therefore, blood tests need to be collected in the morning10 |
| Biological attributes captured | Sex-linked biological trait (reproductive function, androgyny, etc.) | Prostate epithelial activity; androgen-dependent tissue changes |

**Abbreviations:** AR= androgen receptor; (f)PSA= (free) prostate-specific antigen; [-2]proPSA = [-2] Proenzyme Prostate-Specific Antigen; LC-MS/MS = liquid chromatography–tandem mass spectrometry

**References**

1. Abrate A, Lughezzani G, Gadda GM, Lista G, Kinzikeeva E, Fossati N, Larcher A, Dell'Oglio P, Mistretta F, Buffi N, Guazzoni G, Lazzeri M. Clinical use of [-2]proPSA (p2PSA) and its derivatives (%p2PSA and Prostate Health Index) for the detection of prostate cancer: a review of the literature. Korean J Urol. 2014 Jul;55(7):436-45. doi: 10.4111/kju.2014.55.7.436. Epub 2014 Jul 11. PMID: 25045441; PMCID: PMC4101112.
2. Loeb S, Sanda MG, Broyles DL, et al. The prostate health index selectively identifies clinically significant prostate cancer. J Urol, 2015; 193(4):1163-9.
3. Beckman Coulter. Assessed May 5, 2025 at: <https://www.beckmancoulter.com/products/immunoassay/phi>
4. Loeb S, Catalona WJ. The Prostate Health Index: a new test for the detection of prostate cancer. Ther Adv Urol. 2014 Apr;6(2):74-7. doi: 10.1177/1756287213513488. PMID: 24688603; PMCID: PMC3943368.
5. Huang H, Liu Z, Ma Y, Shao Y, Yang Z, Duan D, Zhao Y, Wen S, Tian J, Liu Y, Wang Z, Yue D, Wang Y. Based on PI-RADS v2.1 combining PHI and ADC values to guide prostate biopsy in patients with PSA 4-20 ng/mL. Prostate. 2024 Mar;84(4):376-388. doi: 10.1002/pros.24658. Epub 2023 Dec 20. PMID: 38116741.
6. Lopes Vendrami C, McCarthy RJ, Chatterjee A, Casalino D, Schaeffer EM, Catalona WJ, Miller FH. The Utility of Prostate Specific Antigen Density, Prostate Health Index, and Prostate Health Index Density in Predicting Positive Prostate Biopsy Outcome is Dependent on the Prostate Biopsy Methods. Urology. 2019 Jul;129:153-159. doi: 10.1016/j.urology.2019.03.018. Epub 2019 Mar 27. PMID: 30926382; PMCID: PMC6592745.
7. Booth L, Skelton DA, Hagen S, Booth J. Age and gender stratified normative values for the International Prostate Symptom Score for adults aged 60 years and over. Neurourol Urodyn. 2018 Nov;37(8):2732-2739. doi: 10.1002/nau.23735. Epub 2018 Jun 21. PMID: 29926963.
8. Huang D, Yang X, Wu Y, Lin X, Xu D, Na R, Xu J. Cost-Effectiveness Analysis of Prostate Health Index in Decision Making for Initial Prostate Biopsy. Front Oncol. 2020 Nov 24;10:565382. doi: 10.3389/fonc.2020.565382. PMID: 33330035; PMCID: PMC7732507.
9. Keeney E, Thom H, Turner E, Martin RM, Morley J, Sanghera S. Systematic Review of Cost-Effectiveness Models in Prostate Cancer: Exploring New Developments in Testing and Diagnosis. Value Health. 2022 Jan;25(1):133-146. doi: 10.1016/j.jval.2021.07.002. Epub 2021 Sep 22. PMID: 35031092; PMCID: PMC8752463.
10. Huang D, Ruan X, Wu Y, Lin X, Huang J, Ye D, Gao Y, Ding Q, Xu D, Na R. Genetic polymorphisms at 19q13.33 are associated with [-2]proPSA (p2PSA) levels and provide additional predictive value to prostate health index for prostate cancer. Prostate. 2021 Sep;81(13):971-982. doi: 10.1002/pros.24192. Epub 2021 Jul 12. PMID: 34254325; PMCID: PMC8456816.
11. Leslie SW, Soon-Sutton TL, Skelton WP. Prostate Cancer. [Updated 2024 Oct 4]. In: StatPearls [Internet]. Treasure Island (FL): StatPearls Publishing; 2025 Jan-. Available from: <https://www.ncbi.nlm.nih.gov/books/NBK470550/>
12. de la Calle, C., Patil, D., Wei, J. T., Scherr, D. S., Sokoll, L., Chan, D. W., Siddiqui, J., Mosquera, J. M., Rubin, M. A., & Sanda, M. G. (2015). Multicenter Evaluation of the Prostate Health Index to Detect Aggressive Prostate Cancer in Biopsy Naïve Men. The Journal of urology, 194(1), 65–72. <https://doi.org/10.1016/j.juro.2015.01.091>

# **Serum Androgens & Androgen Receptors Function**

| General characteristics | Biomarker name | Serum androgens (e.g., androstenedione); androgen receptor (AR) function1 |
| --- | --- | --- |
| Source | Serum (for hormones); PBMCs/tissues (for receptor) |
| Purpose | To evaluate hormone levels and support diagnosis of hormonal imbalance (e.g., hypogonadism, PCOS); informs hormone therapy and fertility assessment  Androgen receptor resting is to assess the function and sensitivity of androgen receptors, which are proteins that bind to androgens and regulate their effects1 |
| Unit of measurement | Hormones: ng/dL or nmol/L; AR: expression levels (relative)2 |
| First isolated/measured | 1960s by Wilson & Greep (USA) functional discovery of AR; AR isolation and binding studies followed (1970-80s); 1988/89 cloning of human AR gene McPhaul, Zhou et al. (USA, UK)2,3 |
| Measurement and acquisition | Sample type and collection method | Blood for LC-MS/MS hormone testing; tissue or PBMCs for AR expression via RT-qPCR or immunoblotting  Morning collection  Fasting  Assay consistency  Tissue source matters4,5 |
| Measurement technique or assay | Liquid Chromatography–Tandem Mass Spectrometry (LC-MS/MS) |
| Measurement conditions | NR |
| Cost | $500- $990 (combined androgen panel + AR sensitivity analysis)6,7 |
| Scoring, interpretation, reference ranges | Scoring method, quantification | Absolute values and relative gene/protein expression1 |
| Reference range (normal/abnormal) | Context-dependent; varies with age and condition  Normal values, all age groups: dehydroepiandrosterone sulphate in males- 270-1070 ng/dl; 17-hydroxyprogesterone in females - 15-70 ng/dl8 |
| Age-specific interpretation | Androgen levels decline with age in both sexes; interpretation depends on age-adjusted norms6 |
| Clinical, functional relevance | Insight into systemic and tissue-specific androgen activity; used to investigate androgen resistance, androgen-sensitive cancers, and in some cases, to understand the genetic basis of individual responses to androgen1,3 |
| Critical Appraisal | Strengths (sensitivity, specificity, reproducibility) | Sensitivity: 0.48 at cutoff point in 19 rpt sequences (CAG19)/ Mexican men9  Specificity: Androgens via LC-MS/MS are accurate   - 0.70 at cutoff point in 19 rpt sequences (CAG19)/ Mexican men9   Reproducibility: AR expression requires tissue or PBMCs and is less standardized |
| Limitations (variability, confounding) | Technical demands; receptor expression is tissue-dependent10 |
| Considerations for use (hormonal therapy, time of day) | Morning collection, fasting, androgen levels vary with age and condition11 |
| Biological attributes captured | Sex-linked biological trait (reproductive function, androgyny, etc.) | Includes serum androgens (e.g., DHT, androstenedione) and AR gene/protein expression; relevant for endocrine and developmental research on systemic androgen levels and tissue-specific androgen responsiveness |

Abbreviations: **AR**= androgen receptor; **DHT** = dihydrotestosterone; **LC-MS/MS** = liquid chromatography - tandem mass spectrometry; **PBMC** = peripheral blood mononuclear cells

**References**

1. McEwan IJ, Brinkmann AO. Androgen Physiology: Receptor and Metabolic Disorders. [Updated 2021 Jul 2]. In: Feingold KR, Ahmed SF, Anawalt B, et al., editors. Endotext [Internet]. South Dartmouth (MA): MDText.com, Inc.; 2000-. Available from: <https://www.ncbi.nlm.nih.gov/books/NBK279028/>
2. Sutinen, P., Malinen, M., Palvimo, J.J. (2016). Androgen Receptor. In: Simoni, M., Huhtaniemi, I. (eds) Endocrinology of the Testis and Male Reproduction. Endocrinology. Springer, Cham. <https://doi.org/10.1007/978-3-319-29456-8_12-1>
3. Handelsman DJ. Androgen Physiology, Pharmacology, Use and Misuse. [Updated 2020 Oct 5]. In: Feingold KR, Ahmed SF, Anawalt B, et al., editors. Endotext [Internet]. South Dartmouth (MA): MDText.com, Inc.; 2000-. Available from: <https://www.ncbi.nlm.nih.gov/books/NBK279000/>
4. Campana C, Pezzi V, Rainey WE. Cell-based assays for screening androgen receptor ligands. Semin Reprod Med. 2015 May;33(3):225-34. doi: 10.1055/s-0035-1552989. Epub 2015 Jun 2. PMID: 26036905; PMCID: PMC4624207.
5. Test No.458. Assessed April 29, 2025 at: https://www.oecd.org/en/publications/2023/07/test-no-458-stably-transfected-human-androgen-receptor-transcriptional-activation-assay-for-detection-of-androgenic-agonist-and-antagonist-activity-of-chemicals_g1g6ece6.html
6. Prevention Genetics. Assessed April 29, 2025 at: https://www.preventiongenetics.com/testInfo?val=Androgen-Insensitivity-Syndrome-%28AIS%29-via-the-Androgen-Receptor-%28AR%29-Gene
7. Androgen Receptor Sensitivity (Genetic Analysis). Assessed April 29, 2025 at: <https://marekdiagnostics.com/products/androgen-receptor-sensitivity-genetic-analysis?srsltid=AfmBOorUyCUPY4NFBKp4TmNmkUqbLmO6uJtmy9-K-UD5VoMnmbEj9a_P>
8. Androgen receptor test. Assessed April 29, 2025 at : <https://www.lybrate.com/lab-test/androgen-receptor>
9. Gómez, R., Torres-Sánchez, L., Camacho-Mejorado, R. et al. Androgen receptor CAG polymorphism and sporadic and early-onset prostate cancer among Mexican men. J Hum Genet 61, 781–786 (2016). <https://doi.org/10.1038/jhg.2016.49>
10. Pihlajamaa P, Sahu B, Lyly L, Aittomäki V, Hautaniemi S, Jänne OA. Tissue-specific pioneer factors associate with androgen receptor cistromes and transcription programs. EMBO J. 2014 Feb 18;33(4):312-26. doi: 10.1002/embj.201385895. Epub 2014 Jan 22. PMID: 24451200; PMCID: PMC3989639.
11. Schiffer L, Kempegowda P, Sitch AJ, Adaway JE, Shaheen F, Ebbehoj A, Singh S, McTaggart MP, O'Reilly MW, Prete A, Hawley JM, Keevil BG, Bancos I, Taylor AE, Arlt W. Classic and 11-oxygenated androgens in serum and saliva across adulthood: a cross-sectional study analyzing the impact of age, body mass index, and diurnal and menstrual cycle variation. Eur J Endocrinol. 2023 Jan 10;188(1):lvac017. doi: 10.1093/ejendo/lvac017. PMID: 36651154.

# **Gene Expression in Peripheral Blood Mononuclear Cells (PBMCs) (Sex-Differentiated Panel)**

| General characteristics | Biomarker name | Sex-differentiated gene expression score in PBMCs |
| --- | --- | --- |
| Source | Peripheral blood mononuclear cells (PBMCs) |
| Purpose | Transcriptomic profiling of sex-linked genes in peripheral blood mononuclear cells; used in research on immunity, hormones, and sex differences |
| Unit of measurement | Fold change, normalized expression values1,2 |
| First isolated/measured | Since 2000s started to report sex-based differences in immune responses, suggesting that hormonal and genetic factors might influence gene expression in immune cells3 |
| Measurement and acquisition | Sample type and collection method | Blood sample processed for PBMCs; RNA extracted and analyzed by RNA-seq, microarray, or RT-qPCR; time-of-day matched sampling preferred  Timing, RNA preservation, batch control, normalization methods |
| Measurement technique or assay | RNA-seq ($300–500); RT-qPCR (~$200–300 for small panels) |
| Measurement conditions | Collected in early morning (8–10 AM); influenced by circadian rhythm |
| Cost | $400–800 (depending on method and panel size) |
| Scoring, interpretation, reference ranges | Scoring method, quantification | Composite or gene-specific scores; normalized gene expression values (e.g., fold change or composite scores); dependent on platform |
| Reference range (normal/abnormal) | Gene expression patterns differ between sexes due to sex chromosomes, hormonal, and immune system differences |
| Age-specific interpretation | Expression patterns vary with developmental stage, puberty, aging, and immune status |
| Clinical, functional relevance | Allows to study immune and hormonal activity, with broad relevance for biomarker development and the study of sex-based molecular signatures associated with: autoimmune diseases (e.g., lupus, multiple sclerosis); chronic inflammatory conditions; sepsis and systemic infections  Gene expression changes in PBMCs can indicate early response to immunotherapy, steroid treatment, or antiviral therapy |
| Critical Appraisal | Strengths (sensitivity, specificity, reproducibility) | Sensitivity: High   - 85% at score threshold of 14.75 (disease likelihood 20%); neg predictive value = 83%/ non-diabetic obs CAD patients8   Specificity: panel-dependent   - 43% at score threshold of 14.75 (disease likelihood 20%); pos predictive value = 46%/ non-diabetic obs CAD patients8   Reproducibility: requires stringent RNA handling and normalization; depends on RNA quality, method, and batch control   - CV MSE = 0.00613 (SD 0.00051)9 |
| Limitations (variability, confounding) | Requires specialized lab infrastructure, high-quality RNA, and bioinformatics expertise4,5  Interpretation challenges due to circadian, lifestyle, and medication influence6,7 |
| Considerations for use (hormonal therapy, time of day) | Broad systemic profile of sex-related expression  Relevance for sex-linked research; expression patterns vary with developmental stage, puberty, aging, and immune status6,7 |
| Biological attributes captured | Sex-linked biological trait (reproductive function, androgyny, etc.) | Sex-differentiated immune activity, hormone receptor signaling pathways |

**Abbreviations: PBMC** **=** peripheral blood mononuclear cells**; RNA** = ribonucleic acid; **RNA-seq =** RNA sequencing**; RT-qPCR =** reverse transcription quantitative polymerase chain reaction

**References**

1. Baechler EC. Batliwalla FM. Karypis G, et al. Expression levels for many genes in human peripheral blood cells are highly sensitive to ex vivo incubation. Genes Immun. 2004;5:347–353. doi: 10.1038/sj.gene.6364098. [DOI] [PubMed] [Google Scholar]
2. An Analysis of Blood Processing Methods to Prepare Samples for GeneChip Expression Profiles (Technical Note) <http://media.affymetrix.com/support/technical/technotes/blood_technote.pdf>
3. Nong L, Newton C, Friedman H, Klein TW. CB1 and CB2 receptor mRNA expression in human peripheral blood mononuclear cells (PBMC) from various donor types. Adv Exp Med Biol. 2001;493:229-33. doi: 10.1007/0-306-47611-8_27. PMID: 11727770.
4. Boyanton BL., Jr. Blick KE. Stability studies of twenty-four analytes in human plasma and serum. Clin Chem. 2002;48:2242–2247
5. Barnes MG, Grom AA, Griffin TA, Colbert RA, Thompson SD. Gene Expression Profiles from Peripheral Blood Mononuclear Cells Are Sensitive to Short Processing Delays. Biopreserv Biobank. 2010 Sep 29;8(3):153-162. doi: 10.1089/bio.2010.0009. PMID: 21743826; PMCID: PMC3129811.
6. Boivin DB, James FO, Wu A, Cho-Park PF, Xiong H, Sun ZS. Circadian clock genes oscillate in human peripheral blood mononuclear cells. Blood. 2003 Dec 1;102(12):4143-5. doi: 10.1182/blood-2003-03-0779. Epub 2003 Jul 31. PMID: 12893774.
7. Moldovan L, Anghelina M, Kantor T, Jones D, Ramadan E, Xiang Y, et al. (2014) A Module of Human Peripheral Blood Mononuclear Cell Transcriptional Network Containing Primitive and Differentiation Markers Is Related to Specific Cardiovascular Health Variables. PLoS ONE 9(4): e95124. <https://doi.org/10.1371/journal.pone.0095124>
8. Rosenberg, et al; Multicenter Validation of the Descriptive Accuracy of a Blood-Based Gene Expression Test for Assessing Obstructive Coronary Artery Disease in Nondiabetic Patients. Ann Intern Med.2010;153:425-434. [Epub 5 October 2010]. doi:10.7326/0003-4819-153-7-201010050-00005
9. Qu, H. Q., Glessner, J. T., Kao, C., & Hakonarson, H. (2025). Data-informed insights into sex differences in peripheral blood mononuclear cells from single-cell transcriptomics. Genes & diseases, 12(5), 101525. <https://doi.org/10.1016/j.gendis.2025.101525>

# **Dehydroepiandrosterone Sulfate (DHEAS) Levels**

| General characteristics | Biomarker name | Dehydroepiandrosterone Sulfate (DHEAS) |
| --- | --- | --- |
| Source | Serum |
| Purpose | Assess adrenal gland function for disorder, tumor dx |
| Unit of measurement | Serum2 |
| First isolated/measured | Dehydroepiandrosterone (DHEA) was first isolated in 1934 by Adolf Butenandt, who went on to receive the Nobel Prize in 1939 for his “work on sex hormones”1. In 1944, Munson, Gallagher, and Koch isolated the sulfated form of DHEA, dehydroepiandrosterone sulfate (DHEAS)1. |
| Measurement and acquisition | Sample type and collection method | Blood extracted to measure as serum through high-performance liquid chromatography-tandem mass spectrometry (LC-MS/MS)2 |
| Measurement technique or assay | Measured in unconjugated and conjugated forms2:   - Unconjugated: underwent extraction with hexane followed by derivatization with hydroxylamine - Conjugated: liquid-liquid extraction, performed in one step   Also measured in a chemiluminescent competitive binding immunoenzymatic assay3. |
| Measurement conditions | DHEAS donors were considered ineligible if they reported the use of oral contraceptives, hormone supplements, or menopausal hormone therapy within 3 months of blood drawn2. |
| Cost | $69 |
| Scoring, interpretation, reference ranges | Scoring method, quantification | Quantified in both unconjugated and conjugated forms with stable isotope dilution LC-MS/MS, from which calibration curves for both forms (unconjugated and conjugated) were extracted and analyzed with high performance liquid chromatography-electrospray ionization tandem mass spectrometry (HPLC-ESI-MS)2. |
| Reference range (normal/abnormal) | Context dependent; DHEA and DHEAS levels increase leading to puberty, then steadily decline with age in both sexes1 |
| Age-specific interpretation | Levels vary with developmental stage, puberty, and aging in both sexes1 |
| Clinical, functional relevance | Clinical guidelines of autonomous cortisol secretion (ACS) diagnosis recommend measuring serum concentrations of DHEAS (and corticotropin, ACTH)3 |
| Critical Appraisal | Strengths (sensitivity, specificity, reproducibility) | Sensitivity: LOQ = 0.05 ng/mL2  Specificity: High2   - Avg accuracy = 105%   Reproducibility: High2   - CV = <5%3, ICC = >99%2 |
| Limitations (variability, confounding) | Small sample sizes in existing validation studies, variations in assays and cutoffs3 |
| Considerations for use (hormonal therapy, time of day) | Morning collection, fasting, androgen lvls vary with age and conditions4 |
| Biological attributes captured | Sex-linked biological trait (reproductive function, androgyny, etc.) | The adrenal androgens DHEA and DHEAS begin increasing in children at around 6-8 years, in a period referred to as adrenarche1. This process is accompanied by pubarche, or the clinical development of pubic hair1. DHEA and DHEAS levels steadily rise until the developmental stage puberty, at which point they peak (2nd-3rd decade of life)1. The levels begin a progressive decline of 2%-5% per year following the onset of puberty1. |

**References**

1. World J Meta-Anal. Apr 18, 2023; 11(4): 102-111. Published online Apr 18, 2023. doi: 10.13105/wjma.v11.i4.102. Dehydroepiandrosterone sulfate supplementation in health and diseases. Parth Jethwani, Ashu Rastogi, Ravindra Shukla
2. Trabert, B., Xu, X., Falk, R. T., Guillemette, C., Stanczyk, F. Z., & McGlynn, K. A. (2016). Assay reproducibility of serum androgen measurements using liquid chromatography-tandem mass spectrometry. The Journal of steroid biochemistry and molecular biology, 155(Pt A), 56–62. <https://doi.org/10.1016/j.jsbmb.2015.09.032>
3. Carafone, L. E., Zhang, C. D., Li, D., Lazik, N., Hamidi, O., Hurtado, M. D., Young, W. F., Jr, Thomas, M. A., Dy, B. M., Lyden, M. L., Foster, T. R., McKenzie, T. J., & Bancos, I. (2021). Diagnostic Accuracy of Dehydroepiandrosterone Sulfate and Corticotropin in Autonomous Cortisol Secretion. Biomedicines, 9(7), 741. <https://doi.org/10.3390/biomedicines9070741>
4. Schiffer L, Kempegowda P, Sitch AJ, Adaway JE, Shaheen F, Ebbehoj A, Singh S, McTaggart MP, O'Reilly MW, Prete A, Hawley JM, Keevil BG, Bancos I, Taylor AE, Arlt W. Classic and 11-oxygenated androgens in serum and saliva across adulthood: a cross-sectional study analyzing the impact of age, body mass index, and diurnal and menstrual cycle variation. Eur J Endocrinol. 2023 Jan 10;188(1):lvac017. doi: 10.1093/ejendo/lvac017. PMID: 36651154.

# **Sex Hormone Binding Globulin (SHBG) Levels**

| General characteristics | Biomarker name | Sex Hormone Binding Globulin (SHBG) |
| --- | --- | --- |
| Source | Serum1 |
| Purpose | Assess reasons for abnormal testosterone levels1 |
| Unit of measurement | Free testosterone circulating in the blood1 |
| First isolated/measured | First isolated by Mercier et al in 19665 |
| Measurement and acquisition | Sample type and collection method | Blood sample (serum)1 |
| Measurement technique or assay | 4 methods have been used to measure SHBG3:   - Immulite 2000   - Solid-phase, two-site chemiluminescent immunoassay - COBAS e411   - Automated immunochemiluniscence assay - Mayo Laboratory mass spectrometry: IAL SHGB assay   - Assay involving the immunoextraction of SHGB, trypin digestion into peptides, and mass spectrometric (MS) quantitation of IAL peptide - Mayo Laboratory mass spectrometry: SISCAPA SHGB assay   - Involves trypsin whole serum digestion, IAL peptide immune extraction, and MS quantitation of IAL peptide |
| Measurement conditions | NR |
| Cost | $50-$150 |
| Scoring, interpretation, reference ranges | Scoring method, quantification | Log regression of SHGB estimates on epidemiological, metabolic, and cytokinetic parameters3 |
| Reference range (normal/abnormal) | Influenced by geographic, ethnic, and genetic factors, as well as factors surrounding gender, age, exercise, and endocrine3 |
| Age-specific interpretation | Age-dependent testosterone decreases have been linked with concomitant increases in SHBG4 |
| Clinical, functional relevance | SHBG testing is most often used to provide useful information regarding the functioning of testosterone in the adult body1:   - Adult males with symptoms potentially caused by too little testosterone - Adult females with symptoms that may be linked to overly high testosterone |
| Critical Appraisal | Strengths (sensitivity, specificity, reproducibility) | Sensitivity: 0.656 w cutoff point at 26.75/ Chinese women with PCOS2  Specificity: 0.698 with cutoff point 26.75/ Chinese women with PCOS2  Reproducibility: COBAS e411 CLIA with sandwich method: Intra-assay CVs are 2.1%, 2.4%, and 2.7% at 14, 44, and 204 nmol/L, respectively. Inter-assay CVs are 2.7% at 14 nmol/L and 5.6% at 204 nmol/L/ healthy men3 |
| Limitations (variability, confounding) | Varies diurnally, with age and condition4 |
| Considerations for use (hormonal therapy, time of day) | Peaks in afternoon hour4 |
| Biological attributes captured | Sex-linked biological trait (reproductive function, androgyny, etc.) | The SHBG protein binds to sex hormones in the blood circulation to regulate their activity—when SHBG binds these hormones, they are unusable by the body tissues1,2. Studies have shown evidence for the capacity of SHBG levels as predictors of individuals at higher risk of developing type 2 diabetes mellitus (T2DM), hypertension, and metastasis2. Further, SHBG is also thought to positively contribute to the metabolic pathways in the human body2. |

**References**

1. 2022. SHBG Blood Test. *Medline Plus.* Accessed September 25, 2025. <https://medlineplus.gov/lab-tests/shbg-blood-test/>.
2. Luo, X., Yang, X. M., Cai, W. Y., Chang, H., Ma, H. L., Peng, Y., & Wu, X. K. (2020). Decreased Sex Hormone-Binding Globulin Indicated Worse Biometric, Lipid, Liver, and Renal Function Parameters in Women with Polycystic Ovary Syndrome. International journal of endocrinology, 2020, 7580218. <https://doi.org/10.1155/2020/7580218>
3. Veldhuis, J. D., Bondar, O. P., Dyer, R. B., Trushin, S. A., Klee, E. W., Singh, R. J., & Klee, G. G. (2014). Immunological and mass spectrometric assays of SHBG: consistent and inconsistent metabolic associations in healthy men. The Journal of clinical endocrinology and metabolism, 99(1), 184–193. <https://doi.org/10.1210/jc.2013-2642>
4. Trost, L. W., & Mulhall, J. P. (2016). Challenges in Testosterone Measurement, Data Interpretation, and Methodological Appraisal of Interventional Trials. The journal of sexual medicine, 13(7), 1029–1046. <https://doi.org/10.1016/j.jsxm.2016.04.068>
5. Pomme I.H.G. Simons, Olivier Valkenburg, Coen D.A. Stehouwer, Martijn C.G.J. Brouwers, Sex hormone–binding globulin: biomarker and hepatokine?, Trends in Endocrinology & Metabolism, Volume 32, Issue 8, 2021, Pages 544-553, ISSN 1043-2760, <https://doi.org/10.1016/j.tem.2021.05.002>.

# **Free Androgen Index**

| General characteristics | Biomarker name | Free androgen index (FAI) |
| --- | --- | --- |
| Source | Blood samples drawn in the first week of the menstrual cycle1 |
| Purpose | Assessing the circulating testosterone availability in female hirsutism |
| Unit of measurement | The ratio between total testosterone (TT) and sex hormone binding globulin (SHBG)1;  FAI = TT/SHBG |
| First isolated/measured | FAI was initially introduced in the early 1980s to assess the testosterone in females with hirsutism. |
| Measurement and acquisition | Sample type and collection method | Blood sample1 |
| Measurement technique or assay | Total testosterone measured in literature using 2 methods1,2:   - Solid-phase competitive chemiluminescent enzyme immunoassay1 - RIA after column chromatography2   SHBG measured in literature using 3 methods1,2:   - Radioimmunoassay1 - IRMA (Esoterix Endocrinology)2 - RIA (Diagnostic Systems Laboratory)2 |
| Measurement conditions | Blood drawn during first week of menstrual cycle1 |
| Cost | Depends on TT and SHBG costs |
| Scoring, interpretation, reference ranges | Scoring method, quantification | FAI was calculated by Sağsak et al. (2021) according to the formula: [total testosterone (nmol/L)/SHBG (nmol/L)] × 1001. Total testosterone was measured in ng/dL, so ng/dL was converted to nmol/L (ng/dL × 0.03470: nmol/L)1 |
| Reference range (normal/abnormal) | For women aged 12-21 years1:   - FAI < 3.45 = healthy - FAI > 6.15 = should be evaluated for PCOS |
| Age-specific interpretation | FAI negatively correlates with age1 |
| Clinical, functional relevance | Increasingly used to diagnose patients with hyperandrogenism1 |
| Critical Appraisal | Strengths (sensitivity, specificity, reproducibility) | Sensitivity: 90% at cut-off value 3.45, 89% at cut-off 6.15/ adolescent females with PCOS1  Specificity: 84% at cut-off value 3.45, 77% at cutoff 6.15/adolescent females with PCOS1  Reproducibility: CV = 20.5%/ healthy and androgen deficient women2 |
| Limitations (variability, confounding) | Poor correlation with FT at low levels, relies on accuracy of TT and SHBG3 |
| Considerations for use (hormonal therapy, time of day) | Can only be used in females since SHBG binding capacity must exceed testosterone concentration; morning collection, fasting, androgen levels vary with age and condition4 |
| Biological attributes captured | Sex-linked biological trait (reproductive function, androgyny, etc.) | NR (See: TT and SHBG description tables) |

**References**

1. Sağsak E, Keskin M, Çetinkaya S, Savaş Erdeve Ş, Aycan Z. The Diagnostic Value of Free Androgen Index in Obese Adolescent Females with Idiopathic Hirsutism and Polycystic Ovary Syndrome. J Acad Res Med 2021;11(1):81-85
2. Karen K. Miller, William Rosner, Hang Lee, Joan Hier, Gemma Sesmilo, David Schoenfeld, Gregory Neubauer, Anne Klibanski, Measurement of Free Testosterone in Normal Women and Women with Androgen Deficiency: Comparison of Methods, The Journal of Clinical Endocrinology & Metabolism, Volume 89, Issue 2, 1 February 2004, Pages 525–533, <https://doi.org/10.1210/jc.2003-030680>
3. Trost, L. W., & Mulhall, J. P. (2016). Challenges in Testosterone Measurement, Data Interpretation, and Methodological Appraisal of Interventional Trials. The journal of sexual medicine, 13(7), 1029–1046. <https://doi.org/10.1016/j.jsxm.2016.04.068>
4. Schiffer L, Kempegowda P, Sitch AJ, Adaway JE, Shaheen F, Ebbehoj A, Singh S, McTaggart MP, O'Reilly MW, Prete A, Hawley JM, Keevil BG, Bancos I, Taylor AE, Arlt W. Classic and 11-oxygenated androgens in serum and saliva across adulthood: a cross-sectional study analyzing the impact of age, body mass index, and diurnal and menstrual cycle variation. Eur J Endocrinol. 2023 Jan 10;188(1):lvac017. doi: 10.1093/ejendo/lvac017. PMID: 36651154.
