# Supplementary material for: Systematic review of instruments for measuring sex and gender attributes: Assessment of measurement properties and utility in research on clinical and functional outcomes
Source: Research Square preprint supplement (doi:10.21203/rs.3.rs-7754711/v1), 2025-10-15
Supplement: Supplementary file 5 [file 76950a3081e0e3483396aeee.docx]

**Table 2.** Original study and sample characteristics, including inclusion/exclusion criteria following the PROGRESS-Plus framework.

| Measure name; Year of development; Author, publisher; Country/region/setting; Language of development  Used by (population) in reference to clinical and functionality relevant outcome (reference to papers): | **Measures development sample**   1. Target user 2. Purpose 3. Development sample 4. Number 5. Place of residence of research participants 6. Race/ethnicity/culture/language 7. Occupation 8. Gender/Sex (%M) 9. Religion 10. Education 11. Socioeconomic status 12. Social capital 13. Plus parameters (age, yrs/ sexual orientation/ other) | **Descriptive characteristics of measures**   1. Content, number of items 2. Response options 3. Recall period 4. Method of administration 5. Respondent/administration burden 6. Scoring and interpretation 7. Endorsement | **Measurement properties described in original research**   1. Reliability    1. Internal consistency    2. Test-retest reliability    3. Measurement error 2. Hypothesis-testing (construct validity) 3. Structural validity 4. Missing data (%) 5. Other | **Interpretability**   1. Face validity 2. Researcher(s)’ notes |
| --- | --- | --- | --- | --- |
| 1. Attitudes Toward Women (AWS) Scale- Short Form; 1973; Spence J., Helmreich R. & Stapp J., *Bulletin of Psychonomic Society;* USA/Texas/University of Texas; English  **Used by:**  NR | 1. **Health professionals (e.g., psychologists, counselors, social workers, clinicians) & researchers to study egalitarian vs. traditional gender role beliefs in individuals and groups** 2. To assess attitudes toward the roles and rights of women in society 3. High school and college students    1. Students: n= 241F+286M; Parents: n= 292 mothers + 232 fathers    2. Austin, Texas    3. English-speaking    4. Students in introductory to psych class, parents occupation NR    5. Students: 54%; Parents: 44%    6. NR    7. Students: Pursuing university degrees, Parents: NR    8. NR    9. NR    10. NR | (1) 25 items  (2) 4-point Likert scale (strongly agree to strongly disagree)  (3) No recall period (beliefs/attitudes measure)  (4) Self-report questionnaire  (5) Respondent: no time provided, Administrator: scoring can be performed manually  (6) Score from 0 to 3, where agree strongly (A)=0, agree mildly (B)=1, disagree mildly (C)=2, disagree strongly (D)=3, except for reverse coded items (marked with an asterisk)  - High score indicates a profeminist, egalitarian attitude.  - Low score indicates a traditional, conservative attitude  (7) Psychometric score: medium, ease of use score: no data | (1) NR  (2) NR  (3) NR  (4) NR  (5) Other  Decile Scores:  Students:  Males: mean= 44.80, SD= 12.07, Range= 17-74  Females: mean= 50.26, SD= 11.68, Range= 20-75  Parents:  Fathers: mean= 39.22, SD= 10.49, Range= 10 – 69  Mothers: mean= 41.86, SD= 11.62, Range= 13 – 73 | 1. Items ask about respondents to reflect of their views on the rights and roles 'of women in such areas as occupational, educational, and intellectual activities, dating behavior and etiquette, sexual behavior, and marital relationships 2. Short version (25 items) highly correlated with full 55 item scale, unifactorial structure; discriminates well by gender and generation (e.g students vs parents) Limitation: sample limited to U.S.-based, college students and their parents; may not reflect broader cultural variation |
| 2. Attitudes Toward Women (AWS) Scale; 1972; Spence J T., & Hahn, E. D, *Psychology of Women Quarterly;* USA/Texas/University of Texas; English  **Used by:**  Employed parents of children 3-6 yrs, alcohol use  (Kuntsche et al. 2019) | 1. **Health professionals (e.g., psychologists, counselors, social workers, clinicians) & researchers to study egalitarian vs. traditional gender role beliefs in individuals and groups** 2. To assess attitudes toward the roles and rights of women in society 3. College students    1. n= 241F+281M    2. Austin, Texas    3. Predominately white/English-speaking    4. Students in intro psych class    5. 54% M    6. NR    7. Students: Pursuing university degrees    8. Predominately from MC to UMC    9. NR    10. Age: predominately ranging 18 to 22 years old | (1) 55 items  (2) 4-point Likert scale (strongly agree to strongly disagree)  (3) No recall period (beliefs/attitudes measure)  (4) Self-report questionnaire  (5) Respondent: no time provided, Administrator: scoring can be performed manually  (6) Score from 0 to 3, where agree strongly (A)=0, agree mildly (B)=1, disagree mildly (C)=2, disagree strongly (D)=3, except for reverse coded items (marked with an asterisk)  - High score indicates a profeminist, egalitarian attitude.  - Low score indicates a traditional, conservative attitude  (7) Not applicable | (1) NR  (2) NR  (3) NR  (4) NR  (5) Other  Mean, SD, Skewness:  Male: mean= 21.29, SD= 3.60, Skewness= -.34  Female: mean= 24.31, SD= 3.69, skewness= -.04  Means for male (M) and females (F) in each cohort on total scores  Total; Male: mean= 21.28, Female: mean = 24.31  Item means   1. M: 1.13, F: 1.17 2. M: 1.25, F: 1.12 3. M: 1.71, F: 1.55 4. M: 1.27, F: 1.88 5. M: 1.51, F: 1.84 6. M: 1.54, F: 1.79 7. M: 0.86, F: 0.64 8. M: 1.58, F: 1.71 9. M: 1.95, F: 2.54 10. M: 1.40, F: 1.80 11. M: 1.95, F: 2.46 12. M: 1.70, F: 2.12 13. M: 1.50, F: 1.47 14. M: 1.15, F: 1.72 15. M: 0.82, F: 0.51 | Items ask respondents to reflect on their views of the rights and roles of women in occupational, educational, intellectual, dating, marital, and family contexts. The content directly reflects attitudes toward gender-role equality, supporting strong face validity.Original 55-item AWS developed; 25-item short form shown to be **highly correlated** with the full version, early studies confirmed a **unifactorial structure** (single underlying construct of gender-role attitudes).**Limitation:** sample restricted to U.S. college students, limiting cultural generalizability. |
| 3. Attitudes Toward Women (AWS) Scale- 15 item version;1992; Spence J T., & Hahn, E. D, *Psychology of Women Quarterly;* USA/Texas/University of Texas; English  **Used by:**  Married couples and parents, child-oriented activities  (McHale et al. 1984) | 1. **Health professionals (e.g., psychologists, counselors, social workers, clinicians) & researchers to study egalitarian vs. traditional gender role beliefs in individuals and group** 2. To assess attitudes toward the roles and rights of women in society 3. College students    1. n= 283F + 216M    2. Austin, Texas    3. 71% white, 15% hisp-lat, 9% Asian, 1% other    4. Students in intro psych class    5. 43% M    6. NR    7. Students: Pursuing university degrees    8. Predominately from MC to UMC    9. NR    10. Predominately first years | (1) 15 items  (2) 4-point Likert scale (strongly agree to strongly disagree)  (3) No recall period (beliefs/attitudes measure)  (4) Self-report questionnaire  (5) Respondent: no time provided, Administrator: scoring can be performed manually  (6) Score from 0 to 3, where agree strongly (A)=0, agree mildly (B)=1, disagree mildly (C)=2, disagree strongly (D)=3, except for reverse coded items (marked with an asterisk)  - High score indicates a profeminist, egalitarian attitude;  - Low score indicates a traditional, conservative attitude  (7) Not applicable | 1. Total *α* = NR   *α* = mid .80s or higher  Reported as satisfactory but not explicitly stated  NR   1. NR 2. Single factor approach: Males: eigenvalue= 4.59, common var= 89%, total var= 31%; Females: eigenvalue= 3.81, common var= 86%, total var= 25%  - Males: loadings for items 6 and 13 were positive but not significant - Females: all items loaded significantly   Factor loadings (Male/female): 1) swearing ( .35/ .43), 2) household tasks ( .64/.55), 3) Obey clause (.45/.49), 4) Propose marriage (.49/.53), 5) Worry about rights (.69/.58), 6) Expenses on dates (.18/.38), 7) place in business (.43/.36), 8) same freedoms (.59/.57), 9) encouragement college (.65/.35), 10) locomotive/socks (.75/.57), 11) authority children (.65/.59), 12) community leadership (.76/.56), 13) economic freedom (.19/.34), 14) job preference (.58/.62), 15) apprentice trades (.49/.51)   1. NR 2. Other   Means for male (M) and females (F) in each cohort on total scores  Total; Male: mean= 32.13, Female: mean = 36.34  Item means   1. M: 1.42, F: 1.68 2. M: 2.44, F: 2.82 3. M: 1.65, F: 2.12 4. M: 2.31, F: 2.09 5. M: 2.15, F: 2.52 6. M: 2.00, F: 1.76 7. M: 2.37, F: 2.58 8. M: 2.22, F: 2.59 9. M: 2.74, F: 2.95 10. M: 2.26, F: 2.69 11. M: 2.32, F: 2.76 12. M: 2.27, F: 2.73 13. M: 1.77, F: 1.94 14. M: 1.87, F: 2.45 15. M: 2.35, F: 2.67   Parallel analyses on 15 items:  MANOVA testing with 15 items as dependent variables:   - Main effect of gender yielded significant Wilks lambda of .846 (F [15, 2551] = 27.38, p < .0001) - Main effect of cohort significant Wilks lambda of .319 (F[ 45, 6687.93] = 69.73, p< .0001), for interaction lambda= .823 (F [45,6687.93] = 10.08, p< .0001) | 1. Items continued to ask directly about gender-role beliefs in domains such as education, work, household responsibilities, marriage, dating, and political/social participation, keeping the scale transparent and aligned with its construct. 2. **Remained highly correlated,** with longer versions, has **unifactorial structure** for both men and women, differentiates **groups**   **Limitation:** still largely a sample of U.S. college students, with increased ethnic diversity but not nationally representative |
| 4. Bem Sex Role Inventory (BSRI); 1974;  Bem S., *J Consult Clin Psychol*;  USA/California/ University of Stanford and Foothill College;  English  **Used by:**  Adults during COVID-19 pandemic; depr, anx  (Arcand et al. 2023)  Young adults in heterosexual relationships, depr  (Gibson et al. 2016)  Young, early and late middle age adults, SI  (Hunt et al. 2006)  Adults 55 yrs old, CHD mortality  (Hunt et al. 2007)  Psychiatric hospital workers, workplace stress  (Kerr et al. 2021)  First episode SSD patients, SSD burden  (Luckoff et al. 2021)  Nursing students, course completion  (McLaughlin et al, 2010)  Adults using pain medication for chronic pain, MAE  (Nguefack et al. 2022)  Adults self-identifying as lesbian, self-esteem  (Po Yee Lo et al. 2019)  Older adults, depr  (Vafaei et al. 2016) | 1. Researchers studying sex differences and roles to challenge traditional views linking mental health to sex-typed behavior and explore the impact of flexible sex-role identities 2. To assess self sex-role identification (masculinity, femininity, and androgyny) 3. US college students    1. Stanford Uni: n= 444M +279F, Foothill college: n=117M + 77F    2. College and UN campuses across California    3. English-speaking university students    4. Stanford UN: UG-Intro Psych class, Foothill: students (paid volunteers)    5. Stanford UN: 61%, Foothill: 60%    6. NR    7. UG College and University students    8. NR    9. NR    10. **Age:** mean 25.6±4.2 yrs (M), 24.8±3.9 yrs (F) / NR/ NR | 1. 60 items (20 masculine, 20 feminine, 20 neutral); all items pre-screened for social desirability 2. 7-point Likert scale (never or almost never true to always or almost always true) 3. NA (trait-based inventory) 4. Self-report paper-based survey 5. Respondent: 10-15 mins to complete, Administrator: scoring done manually or be using software 6. Separate scores for M and W; mean of masculine, feminine, and neutral items:  - High Masc & low Fem = Masc - High Fem & low Mas = Fem - High Mas & Fem = Andro - Low Mas & Fem = undifferentiated - Androgyny score = M – F / pooled SD (median split often used to classify people)  1. Psychometric score: high, ease of use score: medium | 1. Total *α* = NR    1. Stanford: Masculinity (*α* .86); Femininity (*α* .80); Social desirability (*α* .70), Androgyny difference (*α* .85) Foothill: Masculinity (*α* .86); Femininity (*α* .82); Social desirability (*α* .70) ; Androgyny difference (*α* .86)    2. Pearson: r= .90 (Masculinity), r = .90 (Femininity), r= .93 (Androgyny), r= .89 (Social desirability)   Stability assessed over 4 wk period   - 1. Sex differences   Stanford   - M > F on Masculinity (M= 4.97 vs 4.57), *t* = 7.62, p < .001 - F> M on Femininity (M = 5.01 vs 4.44), *t*= 13.88, p < .001 - F > M on Social Desirability (M = 5.08 vs. 4.91), t = 4.40, p < .001 - F > M on Androgyny / ratio & difference scores, ts > 14, p < .001   **Foothill**   - M > F on Masculinity (M = 4.96 vs. 4.55), t = 3.86, p < .001 - F > M on Femininity (M = 5.08 vs. 4.62), t = 5.02, p < .001 - F> M on Social Desirability (M= 4.89 vs 4.88), *t*= NR - F > M on Androgyny ratio/difference scores, ts ≈ 6, p < .001  1. Validity correlations   With social desirability:   - Masculinity: combined (.38 M, .19 F), Stanford (.42 M, .19 F), Foothill (.23 M, .19 F) - Femininity: combined (.28 M, .22 F), Stanford (.28 M, .26 F), Foothill ( .15 M, .15 F) - Androgyny: combined (.08 M, .04 F), Stanford (.12 M, .03 F), Foothill (-.07 M, .06 F) - |Androgyny|: near-zero, combined (r = .03 men, –.10 women)   With CPI (keyed feminine) - BSRI Masc: males r = –.42, females r = –.25 - BSRI Fem: males r = .27, females r = .25 - BSRI Androgyny: males r = .50, females r = .30  With Guilford-Zimmerman (keyed masculine) - BSRI Masc: r = .11 (males), .15 (females) - BSRI Fem: r = .04 (males), –.06 (females) - BSRI Androgyny: r = –.04 (males), –.06 (females)   1. Structure:   Masculinity and Femininity are empirically independent   Stanford sample:   - r = .11 (males), r = –.14 (females)   Foothill sample:  - r = –.02 (males), r = –.07 (females)  **(4)** Classification: Subjects classified as sex-typed or androgynous based on androgyny t ratios (≥ |2.025|, p < .05, df = 38)  (5) Other | 1. Items impose definitions of what femininity and masculinity is, reflecting norms in that particular time and culture (i.e., 1974, USA) 2. Gender does not constitute two mutually exclusive categories/opposite poles in terms of femininity/masculinity. Instead, femininity and masculinity are seen as two independent dimensions where a person can score high on one dimension and low on the other, high on both or low on both |
| 5. Conformity to Feminine Norms Inventory (CFNI); 2005; Mahalik et al., *Sex Roles;* USA/Northeast/Boston College; English  **Used by:**  Women in undergraduate psych, ED sx  (Green et al. 2008) | 1. Health professionals (e.g., psychologists, counselors, social workers, clinicians) & researchers to study conform/nonconform to norms on people 2. Assess women’s degree of conform to an array of feminine norms in dominant culture in US (i.e., White, middle and upper-class, heterosexual) 3. W and M (in St 2 only) 4. St1 (factor structure) n=32g+733vW; St2 (reliability n=211W+98 M); St 3 (construct validity) n=380W; St 4 (stability n=39W) 5. College campuses across Northeast 6. St1: g/v: Euro-Am (94/81%), Hisp-Lat (3/5%), Biracial (3/2%), Other (A-Af, Asian, Nat-Am, Other: 3/1/ <1/1%); St2: W/M: Euro-Am (80/83%), Hisp-Lat (4/6%), Biracial (3/2%), Other (A-Af, Asian, Nat-Am: 13/9%); St3: W: Euro-Am (81%), Hisp-Lat (4%), Biracial (2%), Other (A-Af, Asian, Nat-Am: 13%); St4: W: Euro-Am (87%), Hisp-Lat (8%), Asian (5%) 7. St1: UG, MA-Couns Psych, adult W-com; St2: UG–Intro Bio class; St3: FR, SO, JR, SR; St4: NR 8. St1: g/v 0%, St2: 12%, St3: 0%, St4: 0% 9. NR 10. Mostly college students 11. NR 12. St1: g/v single (59/91%), same-sex partner (13/<1%), mar (13/1%), div (9/<1%), cross/other sex partners (6/0%); St2-4 NR 13. Age: St1 g/v 32.5±10 /19.7±2.7; St2 W/M (18.8 ± .73/ 18.8 ±1); St 3 (19.2 ± 1.3); St 4 (27.1 ± 6.6 ) / Sexual orientation: St 1: g/v heterosexual (69/97%), lesbian (19/<1%), bisexual (13/2%); St2-4: NR | 1. 84 items 2. 4-point Likert scale (strongly disagree to strongly agree) 3. No recall period 4. Self-report questionnaire 5. Administrator: difficult for researcher access 6. Subscales scored individually and summed for total conformity; total score range: 84–336; higher scores = greater conformity 7. Not available | 1. Total α= .88 2. **F1)** Domestic (α .84); **F2)** Childcare (*α* .92); **F3)** Romance (*α* .77); **F4)** Fidelity (*α* .85); **F5)** Appearance (*α* .82); F**6)** Nice in Relationships (α .84); **F7)** Thinness (*α* .90); **F8)** Modesty (*α* .82) 3. Pearson CC: ns to .41 btwn **F2**) & **F6)** Stability in the construct over a 2–3-wk period 4. NR 5. BSRI Fem Identity w CFNI Total score r = .40, p < .001; w F2) r = .37, p< .001;w F3) r = .20, p < .01);w F4) r = .30, p < .001;w F6) (r =.4, < .001)   BSRI Mas Identity w CFNI Total score r = .26, p < .001; w F4) r = - .24, p < .01;w F8) r =.19, p < .01  EDI-2 total w CFNI total score r = .18, p < .001; F1) ns; F2) r=–.15, p <.01; F3) r =.18 p <.01; F4) ns, F5) r =.20 p <.001; F6) ns; F7) r =.56 p <.001; F8) r =.15 p <.01  (3)8-factor structure: **1)** Domestic (4 it, load  -.39-.06, h² .2, Eigenv 1.6; Var Exp 9.8%); **2)** Childcare (12 it, load .6-.9, h² .5, Eigenv 8.8; Var Exp 8.1%); **3)** Romance (12 it, load -.6-.1, h² .3, Eigenv 5.4; Var Exp 5%); **4)** Fidelity (12 it, load -.8-.1, h² .4, Eigenv 4.9; Var Exp 4.5%); **5)** Appearance (12 it, load .2-.8, h² .4, Eigenv 3.9; Var Exp 3.6%); **6)** Nice in relationship (5 it, load .6-.7, h² .5, Eigenv 3.3; Var Exp 3%); **7)** Thinness (5 it, load .7-.8, h² .5, Eigenv 3, Var Exp 2.9%); **8)** Modesty (5 it, load .6-.7, h² .4, Eigenv 2.8; Var Exp 2.6%)  **(**4**)** NR  (5) Other | 1. Items reflect trade home roles/duties, nurture, emotions, romance, intimate loyalty, body image, weight concern, humility 2. Multidimensional, captures distinct fem norms in Northeast US; item loadings and factors may vary by sample, Construct validity: total score positively correlates w EDI (Thinness, Bulimia, Body Diss, Intero Awareness)   Limitation: samples US-based, mostly heterosexual, Eur-Am college W; this limits generalizability |
| 6. Conformity to Masculine Norms *Inventory* (CMNI); 2003; Mahalik et al., *Psychology of men & masculinities*; USA/Northeast, Mid-Atlantic, Southeast, Midwest/College campuses; English  **Used by:**  Young men, depr sx  (Iwamoto et al. 2018)  Men in male dominated occupations, MH  (Milner et al. 2018)  Adult men; depr, health literacy  (Milner et al. 2019)  Men with TBI; psychosocial, rehab outcomes  (Schopp et al. 2011)  Fathers in postpartum period, depr  (Short et al. 2023) | 1. Clinicians, researchers to assess conform/nonconform to variety of gender role norms 2. To assess degree of conformity to masculine gender role norms in US dominant culture 3. W and M (in St2 only)    1. St1 (factor analysis) n=752M; St2 (consistency) n=245W+752M; St 3 (comparison) n=269M; St 4 n=157M; St5 n=40M    2. College campuses across Northeast, Mid-Atlantic, Southeast, Midwest United States    3. St1: Caucasian (85%), A-Af (3%), Asian (5%), Hisp-Lat (2%), Biracial (1%), Other (2%); St2: W/M: Caucasian (82/82%), A-Af (4%/4%), Asian (3%/7%), Hisp-Lat (3%/3%), Biracial (1%/1%), Other (1%/3%) ; St3: M: Caucasian (83%), A-Af (4%), Asian (5%), Hisp-Lat (3%), Biracial (1%), Other (3%); St4: M: Caucasian (79%), A-Af (3%), Asian (10%), Hisp-Lat (4%), Biracial (1%), Other (2%); St5: Caucasian (88%), Asian (5%), Hisp-Lat (2%), Biracial (2%), Other (2%)    4. Students (college)    5. St1: 100%, St2: 75%, St3: 0%, St4: 100%, St5: 100%    6. NR    7. College and graduate students    8. NR    9. St1: single (97%), same-sex partner (1%), mar (2%), div (<1%), cross/other sex partners (6%); St2: W/M single (98%/95%), same-sex partner (0%/1%), mar (1%/3%), div (0%/<1%); St3: single (100%); St4: single (93%), same-sex partner (2%), mar (4%), div (<1%); St5: single (75%), same-sex partner (5%), mar (18%), div (2%) 4. Age: St1 20 ±3.42 ; St2 W/M (19.68 ± 3.21/ 20.27 ±4.23); St 3 (19.7 ± 2.01); St 4 (27.1 ± 6.6 ) / Sexual orientation: St1: heterosexual (97%), homosexual (2%), bisexual (<1%); St2: W/M heterosexual (98%/96%), homosexual (<1%/4%), bisexual (2%/<1%); St 3: heterosexual (97%), homosexual (2%), bisexual (<1%); St 4: heterosexual (96%), homosexual (4%); St5: heterosexual (90%), homosexual (10%) | 1. 94 items across 11 subscales (e.g., Winning, Emotional Control) 2. 4-point Likert scale (strongly disagree to strongly agree) 3. No recall period (trait-based self-assessment) 4. Self-report questionnaire 5. ~13 minutes to complete /low burden 6. Subscales scored individually; higher scores indicate stronger conformity 7. Not available | 1. Total α= .94    1. F1) Winning (α .88); F2) Emotional Cntrl (α .91); F3) Risk taking (α .82); F4) Violence (α .84); F5) Power over women (α .87); F6) Dominance (α .73); F7) Playboy (α .88); F8) Self-reliance (α .85); F9) Primacy of work (α .76); F10) Disdain for homosexuals (α .90); F11 Pursuit of status (α .72)    2. Pearson CC: ns to .49 btw **F5**) & **F7)**   Stability in the construct over a 2–3-wk period   - 1. NR  1. NR 2. 11- factor structure, loadings below .3. ignored, accounts for 42.6% common var: F1) **Winning** (12 it, load .39–.73, h² ≈ .56, Eigenv 5.92; Var Exp 4.48%); F2) **Emotional Control** (12 it, load −.79 to −.32, h² ≈ .60, Eigenv 7.88; Var Exp 5.97%); F3) **Risk-Taking** (12 it, load .32–.77, h² ≈ .50, Eigenv 3.17; Var Exp 2.40%); F4) **Violence** (12 it, load .31–.67, h² ≈ .54, Eigenv 2.71; Var Exp 2.05%); F5) **Power Over Women** (12 it, load .35–.58, h² ≈ .54, Eigenv 17.19; Var Exp 13.02%); F6) **Dominance** (12 it, load −.43 to .39, h² ≈ .48, Eigenv 2.44; Var Exp 1.85%); F7) **Playboy** (12 it, load .45–.77, h² ≈ .56, Eigenv 3.55; Var Exp 2.69%); F8) **Self-Reliance** (12 it, load .30–.67, h² ≈ .56, Eigenv 2.33; Var Exp 1.77%); F9) **Primacy of Work** (12 it, load .29–.66, h² ≈ .45, Eigenv 2.98; Var Exp 2.26%); F10) **Disdain for Homosexuals** (12 it, load −.77 to −.31, h² ≈ .61, Eigenv 4.88; Var Exp 3.70%); F11**) Pursuit of Status** (9 it, load .32–.55, h² ≈ .47, Eigenv 5.08; Var Exp 3.85%) 3. NR 4. Other   Kaiser-Meyer-Olkin measure= .89   - Cumulative variance: 44.10%   Comparing men and women on CMNI scores  Men: mean= 134.45, SD= 24.64  Women: mean= 112.43, SD= 20.09 | 1. Items reflect dominant U.S. masculine norms including winning, emotional restraint, risk-taking, heterosexual dominance, work prioritization, and status pursuit 2. Captures diverse masculine norms in U.S. dominant culture; norms reflect affective, behavioral, and cognitive conformity Limitation: U.S.-based, predominantly heterosexual Caucasian college men; limits generalizability to other genders, cultures, or age group |
| 7. Conformity to Masculine Norms Inventory Short Form (CMNI-22); 2008; Burns, S.M & Mahalik, J.R, *American Journal of Men’s* Health; USA/New England/NR; English | 1. Researchers studying masculinity, gender roles, and health; physicians and mental health professionals working with men coping with prostate cancer or sexual dysfunction 2. To assess conformity to an array of dominant cultural norms of masculinity 3. Males following treatment for prostate cancer (ages 42- 86)    1. N= 234    2. United states, across 45 states and the district of Columbia    3. Caucasian (91%), A-Af (3%), Hisp-Lat (2%), Other (3%), NR (1%)    4. UNEM (0.5%), EM (part-time) (8%), EM (full-time) (40%), Not working due to sickness/disability (3%), Retired (47%), NR (1%)    5. 100% M    6. NR    7. No diploma (1%), High school/GED (3%), Trade school (2%), Some college (16%), associate degree (5%), bachelor’s degree (31%), Master’s degree (24%), Law degree (3%), Doctoral degree (12%), Missing (3%)    8. Annual household income: <29,999 (7%), 30k – 39,999 (9%), 40K- 59,999 (17%), 60K- 79,999 (21%), 80k – 99,999 (13%), 100k- 124k (13%), 125k – 199,999 (6%), >200k (6%), NR (3%)    9. Single (2%), div (6%), separated (3%), NR (2%), mar/ with partner (83%), in relationship (3%)    10. Age: Mean= 62.42 ± 8.67/Sexual orientation: transgender (1%), heterosexual (90%), bisexual (4%), homosexual (5%), NR (.5%)/ Cancer location: localized (76%), metastasized/advanced (24%)/Most recent PSA: mean= 16.04 ± 188.30/ Time since treatment (months): mean= 28.24 ± 32.37/ Time since diagnosis (months): mean= 50.27 ± 43.33/ most recent treatment: Chemotherapy (3%), radical prostatectomy (37%), cryosurgery (5%), orchiectomy (.5%), external-beam radiation (26%), brachytherapy (22%), luteinizing hormone (19%), antiandrogens (18%), transurethral resection (.5%), da Vinci robotic prostatectomy (6%) | 1. 22 items across 11 subscales (e.g., Winning, Emotional Control) 2. 4-point Likert scale (strongly disagree to strongly agree) 3. No recall period 4. Self-report questionnaire 5. Respondent: NR, Administrators Not specified 6. Scores can be **summed** to create an overall conformity score or averaged, depending on study design. Higher scores indicate **greater conformity** to traditional masculine norms. 7. Not available | 1. Total α= .94    1. SF-36 subscales: social functioning (α= .84), role functioning (α= .82), mental health (α= .87)    2. NR    3. NR 2. Correlations:  - Social functioning related to age (r = .14, p < .03), time since diagnosis (r = .23, p < .001), urinary functioning (r = .47, p < .001), bowel functioning (r = .42, p < .001). - Role functioning related to age (r = .13, p < .05), time since diagnosis (r = .24, p < .001), urinary functioning (r = .36, p < .001), bowel functioning (r = .16, p < .02). - Mental health related to age (r = .23, p < .001), time since diagnosis (r = .14, p < .03), urinary functioning (r = .29, p < .001).   Regression results:   - Social functioning: Controls explained 30.8% variance; sexual functioning B = 1.89 (p < .001); masculinity × sexual functioning interaction added 1.7% variance. - Role functioning: Controls explained 17.0% variance; sexual functioning B = 2.18 (p < .001); masculinity × sexual functioning interaction added 2.1% variance. - Mental health: Controls explained 11.5% variance; sexual functioning B = 1.89 (p < .001); masculinity × sexual functioning interaction added 1.8% variance.  1. NR 2. NR 3. Other | 1. Items covered men’s social/role, mental, sexual, urinary and bowel functioning, plus adherence to masculine norms (CMNI), showing strong face validity 2. Validated, reliable scales were used; findings aligned with prior research on men with erectile dysfunction post-prostate cancer, supporting construct validity **Limitation:** U.S sample from support groups/online lists (cultural/generalizability issues, self-selection bias); cross-sectional self-report design limits casual inference |
| 8. Drive for Muscularity Scale (DMS); 2000; McCreary D & Sasse D, *Journal of American College Health*; Canada/Ontario/ Mississauga; English  **Used by:**  Male uni students; pubertal timing, drive for muscularity  (Diaz et al. 2020) | - 1. Health professionals (e.g., college counselors, dietitians, coaches) & researchers studying body image, muscle dysmorphia, and health-risk behaviors (e.g., steroid use) related to the drive for muscularity in youth and young adults   2. To assess the drive for muscularity construct by measuring muscularity-oriented attitudes and behaviors   3. High school students   4. n = 101W+ 96M   5. Mississauga, ON   6. NR   7. HS in Eng class   8. 49%M   9. NR   10. Secondary education   11. NR   12. NR   13. Age range of 16-24 yrs old, mean: 18/ NR/ Grade: Gr10 (3%), Gr11 (31%), Gr12 (31%), Gr13 (33%) | 1. 15 items 2. 6-point Likert scale (always to never) (some items reverse scored) 3. Not applicable 4. Self-report questionnaires/survey 5. Relatively low due to less items 6. Averaging of items to get total score with 2 subscale scores, higher score= greater drive for muscularity 7. Psychometric score: medium, Ease of use score: high | 1. Total α= .84    1. Boys (α .84), Girls (α .78)    2. NR    3. NR 2. Face validity: MANOVA test: Pillai F ( 15, 18 I ) = 6.62, p < .0001, Convergent validity: Weight gain main effect: F(1,186) = 68.60, **p < .0001,** DMS positively correlated with frequency of weight training**: r = .24, p < .001,** DMS negatively correlated with self-esteem **(r = –.41)** and positively with depression **(r = .32**) in **boys only**; not significant for girls, **Discriminant validity:**   • DMS × EAT (total): **r = –.05**, ns   • DMS × BD (total): **r= -.15** , p < .03   • For **boys**:    – DMS × EAT: **r = .37**, p < .001    – DMS × BD**: r = .09,** ns   - For **girls**:    – DMS × EAT**: r = .04**, ns    – DMS × BD: **r = –.13**, ns 3. NR 4. NR 5. Other | 1. Items capture internalized male muscularity ideals and desire for bulk via training, supplements, and appearance beliefs 2. Multidimensional development approach; items based on gym users’ input and weight-training media content, High compliance rate Limitations: Cross sectional design limits further examination between drive for muscularity and several outcome variables. Limited interpretation to students used in this single sample (generalizability) |
| 9. Feminine Ideology Scale (FIS); 2007; Levant R., et al., *Sex Roles;* USA/NR/NR; English **Used by:**  Older adults, SI  (Paggi, et al. 2017) | 1. Researchers to investigate traditional and non-traditional ideology as it relates to measures of gender role stress, conflict, conformity, as well as indices of health and mental health 2. To assess the degree to which respondents endorse traditional femininity ideology 3. UG Students    1. n =192M + 210W + 5NR (407 total)    2. NR    3. Euro-Am (81.3%), A-Af (10.1%), Hisp-Lat (2.5%), Asian (2.5%), Other (2.5%), NR (1%)    4. UG students in general psychology course    5. 47%    6. NR    7. College/University students    8. LC (1%), LMC (6.6%), MC (42.3%), UMC (43.2%), UC (4.9%), NR (2%); Parental income: <20k (6.1%), 20k – 40k (11.3%), 40K- 60k (14.7%), 60K- 80k (15.5%), 80k – 100k (20.4%), >100k (28%)    9. Single (56.3%), dating (38.1%), mar (3.9%), div (<1%)    10. Age: 17-20 (89.7%), 21-24 (7.5%), 25-45 (1.1%), NR(1%)/ Sexual orientation: heterosexual (89.2%), homosexual (3.4%), bisexual (6%) | 1. 45 item scale, with 5 factors 2. 5-point Likert scale (strong disagreement (1) to strong agreement (5)) 3. Not applicable 4. NR 5. NR 6. Items average to obtain score, higher score= stronger adherence to traditional femininity ideology, traditional score= add scores on 5 traditional factors and divide by 45, factor scores= add item scores and divide by items in subscale 7. Psychometric score= high, Ease of use= high | 1. Men total (α .93), Female total (α .92)    - - - 1. F: F1) Stereotypic image and activities (α .79), F2) Dependency/deference (α .76), F3) Purity (α .85), F4) Caretaking (α .80), F5) Emotionality (α .81);   M: Stereotypic image and activities (α .84), Dependency/deference (α .85), Purity (α .84), Caretaking (α .72), Emotionality (α .79)   - - - - 1. Pearson CC b/w total scale by sex and FIS factors: Stereotype (r = .73, p < .001), Dependency (r= .58, p< .001), Purity ( r= .81, p <.001), Caring (r= .84, p< .001), Emotionality (r= .78, p< .001)         2. NR  1. MRNI-49 total traditional scale w FIS: Females: r=.69; p < .01, Males: r= .64, p < .01   FIDS w FIS: FIDS Passive acceptance stage 1 (r=.37, p< .001), FIDS Revelation stage 2 (r= .14, p< .001), FIDS active commitment stage 5 (r= .16, p < .001)  BSRI w FIS: Females with femininity scale: r= .07, Males with masculinity scale: r= .06, FIS caretaking with BSRI femininity (r=.20, p < .01)   1. 5 factor analysis, eigen values > 1.5, total var 50.39%: F1) Stereotypic image and activities (11 it, load .43- .76, var 11.46%), F2) Dependency/deference (10 it, load .50- .79, var 10.80%), F3) Purity (9 it, load .53- .76, var 10.40%), F4) Caretaking (7 it, load .46- . 65, var 8.26%), F5) Emotionality (8 it, load .41- .72, var 7.60%) 2. NR 3. Other | 1. Items reflect traditional norms around women’s roles, including physical appearance, chastity, dependency on men, emotional expressiveness, caregiving, and domestic responsibility 2. Captures five factors: Stereotypic Image and Activities, Dependency/Deference, Purity, Caretaking, and Emotionality Limitation: based on a U.S. undergraduate sample (mostly European American); potential item interpretation bias based on gender or cultural background |
| 10. Femininity Score; 2022; Levinsson A, et.al., *Scientific Reports;* United Kingdom/NR/NR; English  **Used by:**  Adults, angina diagnosis  (Levinsson et al. 2022) | 1. Health researchers, epidemiologists, and social scientists studying gender constructs and their impact on health using population-level data 2. To promote gender-aware epidemiological studies to explain variations in diagnoses and disease outcomes in men and women that are not fully accounted for by sex alone 3. Elder individuals    1. n= 166,706W + 149, 231M    2. England, Scotland, Wales    3. NR    4. UNEM: M (1.9%), W (0.8%), EM (paid /self): M (61.8%),W (56.4%), Not working due to sickness/disability M (3.5%), W (2.3%), Student (full or part time): M (0.1%), W (0.3%), Unpaid or volunteer work: M (0.3%), W (0.6%), Taking care of home and family: M (0.5%), W (4.3%), None of the above: M (32%), W (35.3%)    5. 47%    6. NR    7. Vocational qualification/equivalent: M (16.4%), W (9.5%), University or college degree: M (35.2%), W (32.5%), Other: M (8.1%), W (10%), CSE/equiv: M (3.2%), W (3.8%), Alevels/equiv: M (10.8%), W (12.6%), O levels/GCSEs/equiv: M (10.4%), W (15.8%), None of the above: M (15.9%), W (15.8%)    8. NR    9. NR   Age: M: 56.9 ± 8.0, W: 56.4 ± 7.9; Average birth year: M: 1951.17 ± 8.04, W: 1951.69 ± 7.88 /NR/ Depression: none M (81.1%), W (75%), several days: M (15.3%), W (20.3%), More than half the days: M(2.2%), W(2.8%), nearly every day: M (1.5%), W (1.9%)/ Vitamin supplement use: M (26.6%), W (35.6%)/Mean neuroticism score: M (3.55 ± 3.18), W (4.52 ± 3.23)/ Risk taking: M (35%), W (19.9%)/ Height mean: M (176.1 ± 6.7), W (162.9 ± 6.2)/ Smoking: M (11.4%), W (8.6%)/ Prevalent hypertension: M (91.3%), W (93.8%)/ BMI: M (27.8 ± 4.2), W (27 ± 5.1)/ HbA1c: M (36.2 ± 7.1), W (35.6 ± 5.7)/ LDL: M (3.49 ± 0.86), W (3.64 ± 0.87)/ Total cholesterol: M (5.51 ± 1.12), W (5.89 ± 1.12)/ Triglycerides: M (1.98 ± 1.15), W (1.55± 0.86)/ MI incident: M (1.7%), W (0.5%)/ Prevalent angina: M (3.3%), W (1.4%)/ Incident angina: M (4%), W (1.8%)/ Angina before MI incident: M (17.6%), W (15.8%)/ Waist-hip ratio: M (.93 ± .06), W (.82± .07)/ SBP: M (41.1± 17.3), W (135.1 ± 19)/ DBP: M (84.1 ± 10), W (80.6 ± 9.9) | 1. NR 2. 5 variables with 2-12 questions (varying between variables) 3. Not applicable 4. Not specified 5. NR 6. Through formula: FS = intercept + β1*education + β2*work status + β3*depression + β4*risk-taking + β5*neuroticism + β6*birth year 7. Not available | - 1. NR   2. NR   3. NR   4. NR   5. Other   FS as a predictor of angina diagnosis before an MI event   - Significantly associate with angina diagnosis before an MI (OR 1.24, 95% CI 1.10-1.39, p < .001) - Significant sex * FS interaction effect (OR 1.53, 95% CI 1.16- 2.02, p= .003) - When stratified with sex, FS positively associated with angina diagnosis before MI in men (OR 1.37, 95% CI 1.19-1.57, p < .001)   -Not significant in women (OR = 0.90m 95% CI 0.70-1.15, p= 0.41)  Sensitivity analyses   - Negatively associated with current smoking in full sample (OR 0.96, 95% CI 0.95-0.97, p < .001) - Vitamin supplements use negatively associated with FS in women (OR 0.98, 95% CI 0.97-0.99, P= .001) | 1. Captures stereotypical feminine traits using variables: lower education level, caregiving-related work status, lower risk-taking, and higher neuroticism, and greater self-reported depression— traits socially constructed as feminine in Western culture. 2. Shows sex specific predictive value- positively linked to angina diagnosis before MI in men but not women, supports use in sex-specfic cardiovascular research. Applicable across sexes for broad utility.   Limitations: gender role measures reflect generational norms, limited to 1934- 1971 cohorts (generalizability) and self-reported angina data may introduce recall bias |
| 11. Gender Climate Scale; 2023; Ullman J, et al., *Frontiers in Psych*: Australia/NR/NR; English  **Used by:**  GSD secondary students, NR  (Ullman et al. 2023) | 1. Educators, school psychologists, and researchers focused on school climate, gender normativity, and LGBTQ+ student well-being 2. Multidimensional measure of gender and sexuality diverse (GSD) students’ ideas about how gender norms function within their school 3. Young adults    1. n= 1394W+500M+211NB+102 other (2376 total)    2. Australia    3. NR    4. HS (95.7%)    5. 21%    6. NR    7. Majority in high school    8. NR    9. NR    10. Age: 13 to 18, mean= 15.6/ Sexual orientation: heterosexual (5.1%), homosexual (11.2%), bisexual (34.6%), pansexual (17.8%), lesbian (15.8%), asexual (4.4%), queer (7%), other (8.6%) | 1. 30 items 2. 6 point Likert scale (definitely false to definitely true) 3. Not Applicable 4. Online anonymous survey 5. Respondent: 35 minutes to complete, Administrator: not provided 6. Higher scores indicates greater endorsement of truthfulness of each statement applicable to the respondents school env 7. Not available | 1. Total α = NR    1. F1) Reinforcement of traditional gender difference (α .75), F2) Freedom of subject selection (α .79), F3) Freedom of appearance expression (α .92), F4) Inclusive health and physical education curriculum (α .88), F5) Academic fairness (α .90), F6) Popularity based on gender norms (α .91), F7) Schools acceptance and support of gender and sexuality diversity (α .91)    2. NR    3. NR 2. ANOVA testing   Gender differences:  F1) NS; F2) F(4, 2,371)= 6.89, p < 0.001, d = 0.21; F3) [F (4, 2,371) =5.02,p < 0.001, d = 0.18; F4) NS; F5)  F(4, 2,371)=8.80, p < 0.001, d = 0.25; F6) F (4,2,371)=4.13, p < 0.011, d = 0.16; F7) F (4,2,371) =7.09, p < 0.001, d = 0.22  Location differences (rural vs urban): F1) t(2105) = –2.56, **p** = 0.011, **d** = 1.13, F2) t(2105) = 3.49, **p** < 0.001, **d** = 1.37, F4) t(2105) = 2.44, **p** = 0.015, **d** = 1.42, F7) t(2105) = 2.72, **p** = 0.007, **d** = 1.37   1. 7 factor analysis: total var: 70.14%. F1) 3 it, load > .50; F2) 3it, load >.50; F3) 3it, load > .50; F4) 4it, load > .50; F5)5it, load >.50; F6)11 it, load > .50; F7) 3 it, load .65- .92 2. 0.8% - 2% 3. Other | 1. Items assess enforcement and experience of school-based gender norms—such as rules around appearance (e.g., uniforms), curriculum exclusion of GSD identities, teacher bias, and peer marginalization 2. Multidimensional scale capturing institutional, instructional, and interpersonal aspects of gender climate; factor structure validated across gender identities and urban/rural settings. Limitation: Sample limited to Australian high school GSD youth recruited online; generalizability to cis/heterosexual students or other countries requires further study. |
| 12. Gender Role Conflict Scale (GRCS); 1986; O’Neil J et al., *Sex Roles;* USA/Midwestern/NR; English  **Used By:**  Men with TBI; psychosocial, rehab outcomes  (Schopp et al. 2011) | 1. Researchers and psychologists studying men's gender-role conflict and masculinity-related stress using psychometric tools, particularly those interested in the development, validation, and application of gender-role strain theory across diverse populations 2. Assess men’s attitude towards gender role expectations and behaviours 3. UG male students    1. n= 527M    2. Midwestern university    3. NR    4. UG-Intro Psych class: FR (57%), SO (27%), JR (11%), SR (5%)    5. All male    6. NR    7. Students (university)    8. NR    9. Singl (95%), mar (5%)    10. Age: mean- 19.8/ NR/NR | 1. GRCS I: 37 items, 4 factors, GRCS II: 16 items, 4 factors 2. GRCSI: 6 point Likert scale (strongly disagree to strongly agree), GRCS II: 4 point Likert scale (no conflict-very comfortable to very much conflict- very uncomfortable) 3. Not specified 4. NR 5. Not provided 6. High score= greater gender role conflict and fear about femininity 7. GRCSI: medium psychometric, high ease of use, GRCSII: medium psychometric, medium ease of use, GRCS FS: medium psychometric, high ease of use | 1. Total α = NR    1. GRCS I: α .75- .85, F1) Success, power, competitions (α .85), F2) Restrictive emotionality (α .82), F3) Restrictive affectionate behavior between men (α .83), F4) Conflicts between work and family relations (α .75)   GRCS II: α .51- .76; F1) Success, power, competition (α .70), F2) Homophobia (α .76), F3) Lack of emotional response (α .51), F4) Public embarrassment from gender role deviance (α .59)   - 1. GRCS I: α .72- .86, over 4wks; F1) α .84, F2) α .76, F3) α .86, F4) α .72   GRCS II: α .78- .85, over 4wks; F1) α .79, F2) α .78, F3) α .85, F4) α .83   - 1. NR  1. GRCS I: MANOVA test; overall: F(12, 1535) = 9.87, p < .000; F1) F(3, 519) = 7.86, p < .000; F2), F(3, 522) = 20.43, p < .001; F3) F(3, 522) = 9.69, p < .000   GRCS II: MANOVA test overall: F(12, 1541) = 5.53, p < .000; F2) F(3, 522) = 3.51, p < .05; F3) F(3, 522) = 13.43, p < .000; F4) F(3, 522) = 9.67, p < .000.   1. GRCS I: 4 factor structure, total var: 36%: F1) Success, power, competition (13 it, load .41- .72); F2) Restrictive emotionality (10 it, load .35-.78); F3) Restrictive affectionate behaviour between men (8 it, load .48- .71); F4) Conflicts between work and family relations (6 it, load .45- .70)   GRCS II: 4 factor structure, total var: 48%: F1) Success, power, competition (6 it, load .43- .73); F2) Homophobia (4 it, load .67- .82); F3) Lack of emotional response (3 it, load .63- .71); F4) Public embarrassment from gender role deviance (3 it, load .60- .62)   1. NR 2. Other | 1. Items target internalized masculine norms—emotional restriction, competitiveness, discomfort with affection, and work-family tension—rooted in fear of femininity 2. Grounded in sex role strain theory; factor structure derived from U.S. college men; captures varied domains of masculine role conflict. **Limitation:** Sample was predominantly white, U.S.-based undergraduate men; findings may not generalize across age, gender identities, or cultures. |
| 13. Gender Self-Report (GSR); 2023; Strang J, et al., *The American Psychologist*; USA/ DC metropolitan area, Midwest USA, Illinois, Seattle, Washington, New Haven Connecticut, Charlottesville, California, Virginia/ THRIVE Gender clinic, Lurie Childrens hospital, Children’s National Hosptial Gender Clinic, Autism Center of Excellence GENDAAR, George Mason University, Simons Powering Autism Research Knowledge Study; English  **Used By:**  Adults 25, 37 yrs; MH  (Thomas et al. 2024) | 1. Broad researchers, clinical and services-based applications in characterizing gender in diverse populations 2. A versatile self-report tool that captures an individual’s gender experience, including identity, presentation, preferences, and interests 3. Diverse range of individuals    1. n= 1 654: Aut F (34.6%), Aut M (45.7%)    2. DC metropolitan area, Midwest USA, Illinois, Seattle, Washington, New Haven Connecticut, Charlottesville, California, Virginia    3. A-Af (7%), Asian (9.8%), Indian/Nat-Am (2.5), Nat-Haw (.2%), Caucasian (58.3%), Other (2.4%), NR (12.1%), Multi race (7.7), Hisp-Lat (8.7%)    4. NR    5. Sex at birth (designated): 26.1%M    6. NR    7. NR    8. NR    9. NR    10. Age: 27.73 ± 12.15/Heterosexual (45.8%), transgender (18.7%), Cis- sexual minority (35.3%), NB (48%), Questioning (17.2%), Fluid (23%), Genderqueer (27.7%), Agender (13.9%), Demigender (22%), third gender (11.1%), NR (3.5%)/ Aut (37.5%: of which 51.5% are gender diverse)/Current trt: approx. half of sample in gender related medical intervention | 1. 30 items, binary or non-binary factor scores 2. Always true, often true, sometimes true, never true 3. Within last 6 months 4. NR 5. Not provided 6. 9 items indicate femaleness and 7 indicate maleness = 16 items measuring female/male continuum/binary gender diversity (FMC/BGD), the other 12 items indicate nonbinary gender diversity (NGD) 7. Not available | 1. Total α = NR    - - - 1. EAP Reliability: F1) Female-Male continuum (α ..87), F2) Nonbinary Gender diversity (α .75), F3) Binary gender diversity (α .85)   Summed EAP scores: F1) Female-Male continuum (α ..87), F2) Nonbinary Gender diversity (α .73), F3) Binary gender diversity (α .87)   - - - - 1. NR         2. NR  1. F2) Nonbinary > binary trans = SM cis > Het cis   F3) Binary trans > nonbinary > SM cis > het cis   1. 2 factor structure (Female-male continuum and Nonbinary gender diversity): M2 RMSEA= .06, CFI and TLI= .99 2. 0.81% of items missing 3. Other | 1. Items directly ask about gender identity, expression and related preferences, avoiding implying pathology or distress 2. Calibrated for use across youth and adults, cisgender and gender diverse individuals and autistics and non-autistic populations   Limitations: Does not include enough people from specific racial or ethnic groups to test for differences. Also does not include enough intersex individuals or those with variation in sex traits (VST) |
| 14. Gendered Views of Nursing Careers Scale; 2002; Muldoon, O T., & Reilly, J., *Journal of Advanced Nursing*; UK/Belfast, Coleraine/ Queens University of Belfast, University of Ulster; English  **Used by:**  Nursing students, course completion  (McLaughlin et al, 2010) | 1. Nurse educators, career counselors, and health workforce policy makers focused on gender dynamics in nursing education and career development 2. To document nursing students’ perceptions of the gender appropriateness of a range of nursing careers 3. Nursing Students    1. n= 350F+ 34M    2. Belfast, Coleraine    3. Majority Caucasian (values NR)    4. First Year University students studying nursing    5. 8.9% M    6. NR    7. Pursuing nursing degrees: all had minimum education of 5+ general certificate of secondary edu of grades A-C    8. NR    9. NR    10. Age: 20.7 ± 3.95 | 1. 19 nursing careers listed 2. 7 point Likert scale 3. Not applicable 4. Questionnaire 5. Administration: obtain mean responses and rank careers 6. Score of 1= career appropriate for men, Score of 7= career appropriate for women, Score of 4= career for men and women 7. Not available | 1. α= .81 2. Chi square test: Course completion and gender: **χ² = 8.20, p = .009,** Course completion and gender role orientation: χ² = 2.43, p = .229  - MANOVA:   Main effect of course completion: F(3,344) = 3.305, p=.020   - Univariate follow up tests: only gender netural careers showed significant difference: F(1, 346) = 7.033, p=.008 Mean scores: completers: 28.02 ( SD= 2.95), Non completers: 26.53 (SD = 2.88) - Main effect of gender: F(1, 346) = 16.224, p = 0.000   **Significant difference between males and females** in how they rated the careers, Mean scores: M: **25.69** (SD = 3.20), F: **28.06** (SD = 2.87)   1. NR 2. NR 3. Other   Logistic regression to predict students course completion   - 385 cases analyzed, full model was significantly reliable (χ² = 13.8456, df=2, p< .001) | 1. Items reflect interest in nursing career subtypes (HF, F, GN), gender role orientation, academic/occupational self-efficacy, and perceived gender-appropriateness of roles 2. Measures align with known predictors of career interest; structure mirrors theoretical models (e.g., Bandura, gender schema)   Limitations: Largely Caucasian female population, limited number of men with psychologically feminine gender role orientation , mostly from one cultural/educational context; limits generalizability and cross-gender comparison |
| 15. Gender Equitable Men (GEM) Scale; 2008; Pulerwitz, J & Barker, G, *Men and Masculinities*; Brazil/Rio De Janerio/NR: English  **Used by:**  Adult men, family planning behaviors  (Walcott et al. 2015) | 1. To be used in an evaluation of program interventions to promote gender equity and reduce HIV/STI and violence risk 2. To measure gender equity 3. Males    1. Total n= 742M, data analysis and focus on 223 younger M in sample    2. Rio de Janerio    3. NR    4. 54% EM    5. 100%    6. NR    7. 52% completed 6 or less yrs of formal edu    8. Data from: favela (slum neighbourhood), mixed LI and LMI neighbourhood, Mid I and HI neighbourhoods    9. Mar (22%), Dating (47%)    10. Age: Range- 15 to 22, mean= 20/NR/Condom use with primary partner (53%), Condom use with secondary partner (78%)/ Expressed abuse with current/most recent partner (31%) | 1. 24 items 2. 3 point Likert Scales (agree, partially agree or do not agree) 3. Not applicable 4. Community based survey 5. Administrator burden: relatively low, scoring done manually or via software, Respondent: average 40 mins to complete 6. 1 point= least equitable, 2 points= moderately equitable, 3 points= most equitable, responses summed for each subscale and 2 scores combined, higher score= greater support for gender equitable norms 7. Not applicable | 1. Total α= .81    1. Inequitable gender norms (α .85), Equitable Gender norms (α .77)    2. NR    3. NR 2. Full GEM scale: Partner violence (p< .001), Education level (p <.001), Reproductive health behaviors: Condom use (ns, p = .13), Contraceptive use (p = .05)   Inequitable Gender norms subscale: Partner violence, education level, contraceptive use (p < .05), Condom use (ns, p= .19)  Equitable gender norms subscale; partner violence (ns, p = .09)   1. Initial EFA 35 items, factors loadings < .35 or negative dropped (ns), 2 clear factors in 24 items analyzed: Factor 1 (Inequitable): **22%,** Factor 2 (Equitable**): 13%** 2. NR 3. Other | 1. Items reflect norms around sexual/reproductive health, partner violence, masculinity, multiple partners, contraception, and gender equity 2. Captures attitudes toward equitable vs. inequitable gender norms; aligns with theoretical and cultural constructs from formative research in Rio de Janeiro. Multistage development   Limitation: psychometric properties may vary across contexts; possible factor structure distortion due to item wording (positive vs. negative); generalizability outside Brazil requires further validation |
| 16. GENESIS- PRAXY Gender Index; 2015; Pelletier, R, Ditto, B, & Pilote, L., *Psychosomatic Medicine*; Canada. USA, Switzerland/NR/NR; English  **Used By:**  Adults, cardiovascular health  (Azizi et al. 2021) | 1. Researchers and clinicians studying cardiovascular disease risk who seek to incorporate gender-related psychosocial characteristics into health outcomes research and secondary prevention strategies, particularly in younger adults with acute coronary syndrome (ACS) 2. To measure gender and calculate gender scores in patients hospitalized for premature ACS 3. ACS patients (specifically premature)    1. n= 1075 (344W + 731M)    2. 24 centers across Canada, 1 in USA, 1 in Switzerland (centers themselves not specified)    3. White: 82%M, 85%W; English or/and French Fluent    4. NR    5. 68% M    6. NR    7. NR    8. NR    9. mar: 66%M, 61%W    10. Age: mean: 48 M, 48 W/NR/Mental Disability: Sig Depr: 20%M, 28%W; Sig Anx: 35%M, 52%W/Physcial Disability: HTN: 45%M, 54%W; DL: 55%M, 53%W; Diabetes: 14%M, 23%W; OB: 38%M, 42%W; CVD: 19%M, 24%W/ Smoking: 37%M, 43%W | 1. Not applicable 2. Not applicable 3. Not applicable 4. Data derived from GENESIS- PRAXY observational study 5. Not applicable 6. Gender score closer to 0 = masculine characteristics   Gender score in middle region (~50) = androgyny (similar levels of both feminine and masculine characteristics)  Gender score closer to 100 = feminine characteristics   1. Endorsed as ‘novel gender index’ by CIHR | 1. NR 2. NR 3. NR 4. NR 5. Other  - P values < 0.05 statistically significant - PCA analysis done on 26 components: resulted in conclusion first 6 components were meaningful as displayed eigenvalues > - Combined 1-6 accounts for 70% total var - 7 variables found with logistic regression to be associated with sex (primary earner status, personal income, no. hours per week doing homework, primary responsibility for doing housework, BSRI masculinity score, BSRI feminity score | 1. Items selected reflect norms around psychosocial roles, personality traits, stress, social support, caregiving, income, education, and employment status 2. Captures characteristics stereotypically associated with masculinity and femininity; aligns with theoretical constructs of gender identity, roles, relations, and institutionalized gender.   Limitation: biological sex used as a proxy outcome to derive gender score, one-dimensional (masculine–feminine) continuum simplifies analysis but excludes non-binary identities, context-specific to young ACS patients, and limiting broader generalizability. |
| 17. Macho Scale; 2012; Anderson, P., *Sir Arthur Lewis Institute of Social and Economic Studies*; Jamaica/Havendale, Braeton, Denham Town, Mavis Bank/NR; English  **Used By:**  Adult men, family planning behaviors  (Walcott et al. 2015) | 1. Gender and family researchers, sociologists, and policymakers focused on male gender attitudes, fertility, and masculinities in Afro-Caribbean or similar cultural contexts. 2. A measure of masculine identity and gender relations in the Caribbean 3. Men under 60    1. G2: n= 1, 141 (total in group within the 4 towns)    2. Havendale, Braeton, Denham Town, Mavis Bank, Jamaica    3. NR    4. TN1: occupation ranges including entrepreneurs in construction or entertainment, TN2: 60% are craftsmen and operative jobs or working in service and sales jobs, TN3: employments in Kingston public hospital, Kingston Wharves, self-employment through trades (auto mechanics, construction and tailoring) and involvement in Coronation market    5. 100% M    6. NR    7. Primary level or less: G1: TN1 (4.9%), TN2 (13.9%), TN3 (13.6%), TN4 (17.8%), G2: TN1 (10.8%), TN2 (16.3%), TN3 (19.7%), TN4 (44%) ; Secondary level: G1: TN1 (50.6%), TN2 (59.9%), TN3 (80.5%), TN4 (75.9%), G2: TN1 (29.2%), TN2 (61.4%), TN3 (77.7%), TN4 (49.6%) ; Tertiary level: G1: TN1 (44.5%), TN2 (26.1%), TN3 (5.9%), TN4 (7.3%), G2: TN1 (59.9%), TN2 (22.4%), TN3 (2.9%), TN4 (6.5%)    8. TN1: middle income community, TN2: working class community, TN3: garrison community (poverty stricken), TN4: lower middle/ working-class    9. NR    10. Age: Medians: G1: TN1 (39), TN2 (35), TN3(36), TN4 (36), G2: TN1 (42.5), TN2 (41), TN3 (39), TN4 (40)/ NR   G1, TN 1= 2001 census, Havendale ; G1, TN2= 2001 census, Braeton, G1TN3= 2001 census, Denham Town ; G1,TN4= 2001 census, Mavis bank G2TN1= Survey in community, Havendale; G2, TN2= Survey in community, Braeton; G2, TN3= Survey in community, Denham town; G2, TN4= Survey in community, Mavis Bank | 1. 13 items 2. Likert type scale, 1 to 5, (strongly agree, agree, uncertain, disagree, strongly disagree) 3. Not applicable 4. Self-report questionnaire 5. Administrator: adding up and classifying scores by sample distribution, Respondent: self-report questionnaire 6. Score range: 13 to 65, higher values= stronger attachment to masculine attitudes, Scores classified as “high,” “moderate,” and “low” by dividing the frequency distribution of the sample into tertiles 7. Scale items available through publication | 1. Total scale α= .816    - 1. Item statistics (corrected item–total correlation / α if item deleted): It 1: .566 / .795; It 2: .528 / .797; It 3: .499 / .799; It 4: .361 / .810; It 5: .515 / .798; It 6: .351 / .811; It 7: .398 / .808; It 8: .345 / .812; It 9: .389 / .808; It 10: .533 / .796; It 11: .455 / .803; It 12: .525 / .798; It 13: .407 / .807   **Site-specific total α:** Tn 1: α = .79**,** Tn 2: α = .75**,** Tn 3: α = .72**;** Tn 4: α = .77  Subscales:  Dominance and virility*:* overall α = .75, Tn 1: α = .726, Tn 2: α = .656, Tn 3: α = .678, Tn 4: α = .669  Item statistics (corrected item–total / α if item deleted): It 1: .571 / .701; It 2: .530 / .707; It 3: .495 / .715; It 4: .386 / .735; It 5: .482 / .717; It 6: .371 / .738; It 7: .394 / .734; It 8: .341 / .743  Primordial need to have children: overall α = .715, Tn 1: α = .671, Tn 2: α = .658, Tn 3: α = .613, Tn 4: α = .714  Item statistics: It 9: .476 / .66; It 10: .357 / .710; It 11: .486 / .662; It 12: .549 / .634; It 13: .496 /.65   1. NR 2. NR 3. NR 4. Other   Subscale: mean/SD/Skewness  Dominance and virility: 19.44/5.38/.34  Primordial need to have children: 16.56/3.95/ -.16 | 1. Items reflect culturally recognized attitudes around masculinity (male dominance, homophobia, virility, authority, restrictive emotionality) 2. Scale development was informed by prior fieldwork and tested across towns with varying socials classes. Captures multiple, contextually meaningful domains of masculinity among Afro-Caribbean men   Limitations: sample is non-random, limited to Jamaican fathers under 60, affects generalizability across ages, women, other Afro-Caribbean populations |
| 18. Male Role Attitudes Scale (MRAS); 1994; Pleck, J, Sonenstein, F, & Leighton, K., *Sex Roles*; USA/NR/NR; English  **Used by:**  Adult men, attitudes towards seeking professional psychological help  (Sullivan et al. 2014) | 1. Researchers studying adolescent masculinity, gender role socialization, and related constructs such as homophobia, procreative beliefs, and the impact of race, religion, and region on gender attitudes 2. To assess endorsement of traditional masculine ideology 3. Young adult males (15-19yrs)    1. n= 1624    2. USA    3. A-Af (42%), Hispanic (24%), White (46%), Other (4%)    4. NR    5. 100%M    6. NR    7. NR    8. NR    9. NR    10. Age: range: 15-19/ Homosexual contact (2.1%) | 1. 8 items 2. 4 point Likert scale (agree a lot, agree a little, disagree a little, disagree a lot) 3. Not applicable 4. Interview through National Survey of Adolescent Males 5. Administrator: calculating total score, Respondent: average 75 mins to complete 6. Higher scores indicative of greater endorsement of traditional masculine ideology 7. Not applicable | 1. Total α= .82    - - - 1. F1) items 1-3 (α .51), F2) items 4-8 (α .50)          2. NR          3. NR 2. NR 3. 2 factor analysis: F1) (3 it, Eigenv 2.18; Var exp 27.20%), F2) (5 items, Eigenv 1.25; Var exp 15.70%) 4. NR 5. Other   Mean and SD for items in MRAS  Item: 1) mean= 3.23, Sd= .80, agree= 87.9%  2) mean= 3.53, SD= .71, agree 91.3%  3) mean= 3.30, SD= .79, agree 85.2%  4) mean= 1.76, SD= .87, agree 19.6%  5) mean= 2.63, SD= 1.03, agree 56.1%  6) mean= 3.33, SD= .92, agree 82.6%  7) mean= 1.72, SD= .88, agree 15.8%  8) mean= 2.13, SD= .96, agree 32%  Total: mean= 2,80, SD= .44 | 1. Measures distinct attitudes toward male roles (e.g. dominance, homophobia, procreative beliefs), separate from female/general role attitudes 2. Developed from theoretical distinctions, validated with discriminant and incremental validity   Limitations: Single-item comparators reduce reliability; superior results may reflect multi-item design; adolescent sample limits generalizability |
| 19. Masculine Gender Role Discrepancy Stress Scale; 2016; Reidy, D E, et al., *Arch Sex Behav*; USA/Georgia/University of Georgia, Centers for Disease Control & Prevention; English  **Used by:**  Adult men, muscle dysmorphia  (Cunningham et al. 2020)  Adult men, MH  (Yang et al. 2018) | 1. Public health practitioners and researchers examining how masculine norms contribute to risky sexual behavior and STD risk in adolescent and adult men, with the goal of informing gender-sensitive prevention strategies. 2. To assess men’s experiences with gender role discrepancy stress 3. Males    1. n= 600    2. USA (national data collection via website)    3. Asian (13%), A-Af (7%), Caucasian (72%), Hisp-Lat (7%)    4. NR    5. 100%M    6. NR    7. NR    8. NR    9. NR    10. Age: range= 18-50, mean= 27.2 ± 6.8/ 7% not exclusively heterosexual (gay,bisexual,trans,queer) | 1. 5 item Gender role discrepancy scale, 5 item discrepancy stress scale 2. 7 point Likert Scale (rating of alignment with 10 statements that are gender role discrepancy based) 3. Not applicable 4. Survey via Amazon’s Mechanical Turk web site 5. Administrator: relatively low- scoring can be done manually or through software, Respondent: 30 mins to complete 6. Items individually self-rate and mean score calculated, higher score= more prominent gender role discrepancy and discrepancy stress  - Summing participants responses for each questions generates score for ach subscale  1. Discrepancy stress scale: psychometric score: medium, ease of use score: high; Masculine gender role stress scale: high psychometric score | 1. Total α= NR    1. 5 it discrepancy (α .91), 5 it discrepancy stress scale (α .86)    2. NR    3. NR 2. NR 3. Eigenvalue analysis showed 3 factors >1: 56% var   Scree plot:  F1) discrepancy stress (39% var, lambda=6.6), F2) gender role discrepancy (12%, lambda= 2.4), F3) items that failed to load onto 2 intended factors (5%, lambda= 1.3)  All items loaded .5 or higher onto factors for discrepancy and stress   1. NR 2. Other   Kasier-Meyer-Olkin value= .91  Bartletts test of sphericity= statistically significant (x2 (120)=4954.24, p<.001)  Regression for age at first sexual intercourse: statistically significant: F(5, 493)=2.21, R2=0.02, p=.05  Interaction term for gender role discrepancy and discrepancy stress was significant: b= .10, p< .05  High gender role discrepancy + high stress: b = .24, p =.05  Low gender role discrepancy + high stress: b = -.28, p=.05  Number of sexual partners:  Model fit: LR X2 (5)= 339.68, p< .001  Main effect: gender role discrepancy: X2 Wald (1) = 7.24, p< .01, IRR= .84  Main effect: discrepancy stress: X2 Wald (1) = 6.68, p= .01, IRR= 1.18  Unprotected sex with casual partners:  LR χ²(5) = 144.76, p < .001  Interaction effect: significant: χ² Wald(1) = 16.79, p < .001, IRR = 1.24  **Low Discrepancy + High Stress**: **χ² Wald(1) = 8.44, p < .005, IRR = 0.76**  **High Discrepancy + High Stress**: **χ² Wald(1) = 4.03, p < .05, IRR = 1.18**  Number of diagnosed STDs  **Model fit: LR χ²(5) = 36.62, p < .001**  Interaction term: significant: **χ² Wald(1) = 20.46, p < .001, IRR = 1.55**  **Low Discrepancy + High Stress: χ² Wald(1) = 5.67, p < .05, IRR = 0.54**  **High Discrepancy + High Stress: χ² Wald(1) = 5.14, p < .05, IRR = 1.62** | 1. Items reflect internalized gender norms and perceived gender role discrepancy (i.e., viewing oneself as less masculine than the average male) and related distress, assessing psychosocial aspects of masculinity, self-perception, and emotional response to norm nonconformity 2. Captures gender identity and stress linked to failing masculine expectations, consistent with gender socialization theory  Limitations: cross-sectional design prevents causal inference; self-reported data may be biased or inaccurate; sample lacks diversity (largely homogenous in ethnicity and sexual orientation) |
| 20. Masculine Gender-Score; 2023; Vader, S S, et al., *Preventive Medicine Reports*; USA/the Netherlands/Doetinchem, Amsterdam; English  **Used By:**  Same as development sample | 1. Epidemiologists and social scientists using population-level data to explore how traditional masculinity in everyday life contributes to sex differences in chronic disease prevalence 2. To assess masculinity over 4 domains; work & education, informal care, lifestyle and emotions 3. W +M    1. n= 4017 (1900M + 2117W)    2. Doetinchem, the Netherlands    3. NR    4. Hrs doing weekly odd jobs: <5hrs: 80.6%M, 96.8%W, 5-10hrs: 21.1%M, 23.5%W, ≥10hrs: 9.7%M, 0.9%W; Paid work division: equal division: 28.1%M, 23.1%W, respondent more responsible: 38.8%M, 31.0%W, Partner more responsible: 33.1%M, 45.9%W    5. 47%M; Gender: M: 12.2 ±2.5, W: 9.2±2.5    6. NR    7. Lower edu lvl: 9.4%M, 24.1%W, Same edu lvl: 55.3%M, 52.5%W, Higher edu lvl: 35.3%M, 23.4%W    8. Low SES: 39.3%M, 52.2%W, Int SES: 33%M. 26.9%W, High SES: 27.7%M, 20.9%W    9. NR   Age: Range- 40 to 80, M: 60.5±9.5, W: 59.4±9.7/ NR/Hrs per week doing house chores: ≥10hrs: 12.5%M, 64.1%W, 5-10hrs: 21.1%M,23.5%W, <5hrs: 66.4%M, 12.5%W/Taking care of sick people: (Almost) never: 96.4%M, 87.8%W, Couple times per month: 1.1%M, 2.6%W, Daily + weekly: 2.6%M,9.6%W/Smoking: 7.3%M, 2.4%W/Drinking alcohol: Not or almost never: 19.3%M, 42%W, Wine and/or port sherry vermouth: 16%M, 46.8%W, Beer and/or liquor: 64.7%M, 11.2%W/ Physical intensity of sport: none or light exercise: 49.8%M, 45.7%W, Moderate: 19.2%M, 35.6%W, Heavy or masculine type sports: 31.0%M, 18.7%W/Work limitation due to emotional problems: 12%M, 16%W/Nervous feelings: often, constantly: 3.1%M, 4.9%W, Sometimes, never: 96.9%M, 95.1%W/ Energetic and vibrant feeling: often, constantly: 73.9%M, 63.8%W, Sometimes, never: 82.7%M, 76.3%W/ Diabetes: 7.1%M, 5.8%W/Coronary heart disease: 4.8%M, 1.5%W/CVA: 3.2%M, 2.0%W/ Arthritis: 4.5%M, 8%W/Chronic pain: 41.7%M, 57.2%W/Migraines: 3.1%M, 6.9%W | 1. Assessed over 4 domains: lifestyle, emotions, informal care, work & educations 2. Self-report based on 3 categories for each variable 3. Not applicable 4. Questionnaires and medical examinations 5. Administrator: self report survey, available as described in publication results, Respondent: No est. time to complete given 6. Score from 0-2 assigned to each response, gender score calculated by summing all variables (0-19), higher score= individual presenting more masculine connotated aspects of everyday life 7. Variables chose are comparable to gender related variables in similar studies, covers 4 gender dimensions proposed by Johnson, cross sectional data from Doetinchem Cohort Study | 1. NR 2. NR 3. NR 4. NR 5. Other   Gender score context:  Avg gender score:  Men: mean= 12.2, SD= 2.5  Women: mean= 9.1, SD= 2.4  Odd Rations (Ors) with 95% CI and pvalues < .05 considered significant  Male prevalent diseases:  Diabetes:  OR before adjustment: 1.21 (C1: 0.93- 1.58)  OR After adjustment: 1.60 (CI: 1.18 -2.17)  CHD:  OR before adjustment: 3.70 (C1: 2.40- 5.71)  OR After adjustment: 4.69 (CI: 2.92 -7.53)  CVA:  OR before adjustment: 1.48 (C1: 0.97- 2.26)  OR After adjustment: 2.33 (CI: 1.40 -3.89)  Female prevalent diseases:  Chronic pain:  OR before adjustment: 0.53 (C1: 0.45- 0.60)  OR After adjustment: 0.73 (CI: .63 -.86)  Migraine:  OR before adjustment: 0.45 (C1: 0.33- 0.62)  OR After adjustment: 0.69 (CI: 0.48 -0.998)  Arthritis:  OR before adjustment: 0.53 (C1: 0.40- 0.70)  OR After adjustment: 0.94 (CI: 0.67 -1.31) | 1. Items capture masculine traits across work, caregiving, lifestyle, emotions and social domains 2. Highlights masculinity’s multidimensional nature beyond sex, showing overlap between men and women  Limitations: based on secondary data with no direct gender measures, may reinforce stereotypes, cross-section/self-report design, limited demographic diversity, and only masculine aspects assessed |
| 21. Masculine Measure; 2012-2013; Rhead, R et al., *AIDS*; Zimbabwe/Manicaland/NR; English  **Used by:**  Same as development sample | 1. Public health researchers and HIV program designers seeking to measure and address the impact of diverse masculine norms on HIV prevention, testing, and treatment in sub-Saharan African settings. 2. To establish the individual level determinants of masculine norms and their implications for HIV prevention and treatment program 3. Males    1. n= 3116    2. East Zimbabwe/ Study site type: TN: 23.9%, agricultural estate: 21.1%, roadside settlement: 28.4%, Subsistence farming area: 26.6%    3. NR    4. NR    5. 100%M    6. No religion (18%), Christian (46%), Spiritual (23%), Other (12.5%)    7. Primary school or less (16.8%), Secondary or higher (82.8%)    8. Low SES: 11%, Low-middle SES: 42%, Middle SES: 32%, High SES: 15.5%    9. Marital status: mar: 50%, never mar: 45.2%, div: 3.8%, widowed: 1%/ Community: No community: 47%, One community: 28%, >1 community: 24.7%    10. Age: 15-24: 43.4%, 25-34: 25.3%, 35-44: 19.2%, 45-54: 12.1%/NR/ HIV status: infected: 12.2%, uninfected: 87.7% | 1. 6 items under 4 areas (toughness, antifemininity, sex drive, social status) 2. Agree or disagree with each statement 3. Not applicable 4. General population survey 5. Administrator: questions were developed for masculine norms identified from specific cohort data, Respondent: relatively low, 16 statements to agree/disagree with 6. Respondents self-rate items that generate four continuous variables—toughness, antifemininity, sex drive, and social status—reflecting the degree to which each masculine norm is endorsed (higher scores indicate stronger endorsement). 7. Data taken from Manicaland HIV/STD prevention project, which is an open-cohort general population survey examining dynamic of HIV transmission and its impact in 8 sits in Manicaland in eastern Zimbabwe | 1. NR 2. NR 3. NR 4. NR 5. Other   4 factor CFA model: produced borderline goodness of fit statistics: (CFI: 0.816, TLI: 0.775, RMSEA: 0.065, SRMR: 0.111)  Among HIV negative men  Antifeminity: hs vs ls (61% vs 54%, p < .01)  Sex drive:   - Avoiding HIV: hs vs ls (61% vs 54%, p <.01) - Tested in last 3 yrs: hs vs ls ( 75% vs 69%, p = .02) - Ever tested: hs vs ls (82% vs 74%, p< .01)   Social status:   - Condom use: hs vs ls (21% vs 15%, p = .05) - Tested in last 3 yrs (69% vs 74%, p =.04)   Among HIV positive men  Sex drive   - Diagnosed HIV +: hs vs ls (85% vs 61%, p= .02) - On treatment: hs vs ls (91% vs 62%, p =.04) - AIDS group membership: hs vs ls ( 77% vs 46%, p= 0.03) | 1. Items capture multiple dimensions of masculine social norms (toughness, anti-femininity, sex drive, social status) grounded in qualitative research from the same region, reflecting culturally relevant masculine constructs 2. Demonstrates meaningful variation across individual characteristics (age, marital status) and associations with HIV-related behaviors, supporting its conceptual relevance and feasibility for large surveys. Limitations: self-reported sexual behavior data may be subject to social desirability bias; potential need for adaptation of the social status dimension for other health contexts, findings may not fully generalize beyond sub-Saharan African contexts without further validation |
| 22. Male Role Norms Inventory (MRNI); 2013; Levant, R F, Hall, R J & Rankin, T J, *Journal of Counseling Psychology*; USA/Ohio/ University of Akron; English  **Used by:**  Adult Nigerian men, early cancer detection behaviors  (Esiaka et al. 2022)  Adult men, prostate-related functioning  (Hoyt et al. 2013)  Older adults, SI  (Paggi, et al. 2017) | 1. Researchers and clinicians assessing men’s adherence to traditional masculine norms across 2. To measure traditional masculinity ideology 3. F + M    1. n= 1017 (549M + 486W)    2. University of Akron, USA    3. White/Euro-Am (82.9%), Black/A-Af (9.1%), Hisp-Lat, Asian, Middle Eastern, Inuit, Indi-Am or bi/multiracial (6.7%)    4. Students in psychology, computer science and physics courses    5. 54%M    6. NR    7. Pursuing university degree    8. Median household income- $40,001- $60,000; MC (54.2%), LMC (20.7%), LC (6.7%), UMC (15.8%), UC (.9%)    9. Mar (13.4%), Dating (37%), casual dating (17.6%), single (29.9%), div or separated (1.8%)    10. Age: range 18 to 59, mean- 21.18 ± 5.00/Heterosexual (94.8%), Bisexual (1.8%), gay/lesbian (2.1%), NR (1.4%) | 1. 58 items with 7 subscales 2. 7 point Likert scale (strongly disagree to strongly agree) 3. Not applicable 4. Self-report surveys 5. Administrator: relatively low, scoring can be done manually or by software, Respondent: questionnaire considered lengthy but overall has low respondent burden 6. Mean score acquired fro each subscale and overall mean score calculated encompassing al subscale averages, higher score= greater endorsement of traditional masculinity 7. MRNI: high psychometric score, high ease of use scoreMRNI-R: medium psychometric score, high ease of use score, MRNI-SF: medium psychometric score, medium ease of use score | 1. Total α male= .96, Total α female= .96    1. F1) restrictive emotionality: M (α .88), F (α .89); F2) self-reliance through mechanical skills: M (α .85), F (α .86); F3) negativity toward sexual minorities: M (α .92), F (α .92); F4) avoidance of femininity: M (α .89), F (α .87); F5) importance of sex: M (α .84), F (α .82); F6) Toughness: M (α .75), F (α .78); F7) Dominance: M (α .88), F (α .90)    2. NR    3. NR 2. NR 3. 7 factor principal axis analysis, eigenv > 1.0, total var: 62.71% F1) restrictive emotionality (12 it, load .38-.66; var 40.92%), F2) Self reliance through mechanical skills (3it, load .6-.9; var 6.26%), F3) Negativity toward sexual minorities (9it, load -.48 - -.78; var 5.25%), F4) avoidance of femineity (9it, load -.35- -.70;var 3.01%), F5) importance of sex (4 it, load -.45 - -.73; var 2.87%), F6) toughness (5 it, load -.45 - -.61; var 2.39%), F7) dominance (7 it, load -.37 - -.70; var 2.01%) Top of FormBottom of Form 4. NR 5. Other   Mean score differences: men vs women  MRNI Total: Mean (3.88 M, 3.05 F), F: 89.78, p value < .001  F1) Restrictive emotionality: Mean ( 3.19 M, 2.40 F), F: 71.27, p value < .001  F2) self reliance through mechanical skills: Mean (4.76 M, 4.31 F), F: 14.91, p <.001  F3) negativity toward sexual minorites: Mean (3.64 M, 2.86 F), F: 37.78, p <.001  F4) avoidance of feminiity: Mean (4.17 M, 3.36 F), F: 56.82, p < .001  F5) importance of sex: Mean (3.80M, 3.08 F), F: 33.76, p<.001  F6) toughness: mean (4.92 M, 3.79 F), F: 119.85, p<.001  F7) dominance: mean (3.44M, 2.46 F), F: 90.27, p< .001  Convergent validity  MRAS: correlation = .60; CMNI: correlation = .60; GRCS: correlation = .54; NMAS: correlation= .51 | 1. Items comprehensively assess multiple dimensions of traditional masculinity ideology confirmed through factor analysis, offering a brief yet multidimensional measure appropriate for research and clinical contexts. 2. Limitations: Sample largely comprised of young, White, heterosexual college students from a limited geographic region; self-report data may be influenced by social desirability; generalizability beyond this demographic remains to be tested |
| 23. Masculinity in Chronic Disease Inventory (MCD-I); 2019; Occhipinti, S et al ., *American Journal of Men’s Health*; Australia/Adelaide; English  **Used by:**  Same as development sample | 1. Researchers and clinicians studying how internalized masculine beliefs influence men's health behaviors and outcomes in the context of chronic disease, particularly in aging male populations. 2. A measure of masculinity for men with chronic disease 3. Elder men (47-93)    1. n= 633M    2. Australia    3. Caucasian (85.7%), Asian (.5%), Euro (.5%), Aboriginal (.2%), Anglo-indian (.3%), NR(1.4%)    4. EM (full time or by self) (36.5%), EM (part time or casual) (7.7%), Full time home career/duties (1%), UEM or looking for work (.5%), retired (50.5%), Student or volunteering (1.3%), unable to work (.6%), other (1.4%), NR (.5%)    5. 100%M    6. NR    7. Primary school complete (23.5%), highschool complete (11.4%), trade or technical certificate or diploma (42.9%), university degree (14.3%), Other (3.5%), NR (2.3%), Schooling not complete (2.1%)    8. Income: <20k (9.8%), 20k-<40k: (24%), 40k-<60k: (15.9%), 60k- <80k: (12.2%), 80k+: (26.2%), NR (4.2%)    9. Mar (80.1%), Div or separated (9.3%), widowed (4.0%), never mar (3.9%), NR (2.7%)/Children: 1 or more (77.2%), none (12.7%)    10. Age: range: 47-93, mean 67.35 ± 10.05 / Heterosexual (80.5%), homosexual (.8%), bisexual (1.4%), NR (9.2%), Didn’t want to report (1.9%)/ Medical characteristics: Cancer: skin cancer (12.5%), melanoma (5.3%), bladder cancer (1.6%), prostate (7.6%), bowel cancer (.6%), kidney cancer (.6%), non-Hodgkin’s lymphoma (.5%), pancreatic cancer (.2%), other (2.4%); Comorbidity: 1 condition (27.2%), 2+ conditions (67.8%); Weight: underweight (.2%), normal (14.5%), over (42.9%), NR (10.5%), C1O (23.2%), C2O (7.1%), C3O (1.8%); Heart attack (9.2%), Stroke (3.1%), Angina (8.7%), TIA (2.4%), Atrial fibrillation (6.4%), kidney disease (3.7%), hypertension (48.4%), hypercholesterolemia (40.2%), smoking related lung condition (4.3%), Parkinson’s disease (1%), asthma (12.5%), diabetes (15.6%), hyper/hypothyroidism (2.2%), enlarged prostate (19%), osteoarthritis (27.5%), osteoporosis (4.3%) Gout (13.7%), Anx (6.6%), depr (6.8%), insomnia (2.9%), stress-related condition (5.8%), don’t know (1%), none of the above (4.3%) | 1. 22 items, 6 subscales 2. 5 point Likert scale ( not true at all to very true) 3. Not applicable 4. Cross-sectional survey 5. Administrator: not specified, Respondent: No est. time to complete given 6. NR 7. Not available to public | 1. Total α= NR    1. F1) optimistic action (α .88), F2) sexual importance/priority (α .93), F3) family responsibility (α .89), F4) Emotional self-reliance (α .68), F5) Strength/fitness (α .74),    2. NR    3. NR 2. MCD-I and total scale correlations:   Total scale: F1) r= .84, p<.001, F2) r=.67, p<.001, F3) r=.69, p<.001, F4) r=.33, p<.001, F5) r=.72, p<.001   1. 5 factor: 57% var :   F1) optimistic action: 9it, EFA load (.45 - .88), CFA load (.54 - .81); F2) Sexual priority/importance : 4it, EFA load (.69- .96), CFA load (.82-.93); F3) family responsibilities: 4it, EFA load (.62-.88), CFA load (.77-.89); F4) Emotional self-reliance: 2it, EFA load (.75-.83), CFA load (.51-.84); F5) strength/fitness; 3it, EFA load (.54-.85), CFA load (.56-.85)  Discriminate validity:  Men on erectile dysfunction and age: F1) Optimistic Action (r = −.16, p < .001), F2) Sexual Importance/Priority (r = −.52, p < .001), F5) Strength/Fitness (r = −.18, p < .001)  Men by age: F2) Sexual Importance/Priority (r = −.46, p < .001), F5) Strength/Fitness (r = −.10, p = .012)   1. NR 2. Other | 1. Items assess multiple dimensions of masculinity relevant to men living with chronic disease, including optimism and action orientation, sexual importance and priorities, family responsibilities, emotional self-reliance, and physical strength/fitness. 2. Scale established masculinity theories and prior validated measures, adapted specifically for chronic disease contexts, Diverse participant sample included men with a range of chronic diseases, increasing generalizability within this population.   Limitations: Cross-sectional design limits causal conclusions about masculinity’s influence on health outcomes. Lacks diversity in sexual minority men |
| 24. MMPI-2  Original version:  Minnesota Multiphase Personality Inventory (MMPI); 1943; Hathaway, S. R & McKinley, J. C., ; USA/Minnesota; English  **Used by:**  Men conscripted to military, mortality  (Mansdotter et al. 2009) | 1. Clinicians and psychologists diagnose mental health disorders and plan treatment 2. To assess personality structure and psychopathology 3. Individuals 14 years old and older   a. MMPI-2: N = 2600, 1, 133 M, 1, 462 E  b. From 7 different states in USA  c. Majority white and black, minority groups include: native American, Asian American, Hispanic American  d. NR  e. 43.7% M, 56.3% W  f. NR  g. Range: less than high school to several years post college  h. NR  i. NR  j. Age: range- 23- 80 years old | 1. 56 items 2. True/false 3. Not applicable 4. Paper and pencil booklets 5. For MMPI-3: Respondent: 25-35 mins to complete by computer, 35-50 min by paper and pencil /Administrator: requires purchase 6. High: (For Males) Passive, aesthetic and artistic interests, intelligent, sensitive to others, tolerant and has good controls. If very high - possible sex role identity conflicts. (For Females) Rejects the stereotypic female role, has masculine interests in work and hobbies, and may be aggressive and dominating.   Low: (For Males) Limited intellectual ability, narrow range of interests, practical, aggressive, and has traditional male interests. (For Females) Passive, submissive, constricted and sensitive4.   1. Strict licensing and can only be purchased, administered and interpreted by suitably experienced clinical psychologist or psychiatrist through Pearson Assessments   Upwards of 5 versions of MMPI; MMPI-2, MMPI-2-RF, MMPI-A, MMPI-A-RF, MMPI-3:   - MMPI-2: revised version of MMPI, with 567 questions, taking 60 to 90 mins to complete, normative sample age of adults aged 18 and older - MMPI-A: targeted to adolescents aged 14 to 18, with 478 questions and takes an hour to complete - MMPI-A-RF: 241 questions, 25 to 45mins to complete - MMPI-3 latest version, takes 25 to 50 mins, | 1. Total α= NR 2. GM: α= .72 M, α= .75 F    GF: α= .57 M, α= .58F   1. 8.5 day interval, n= 193   Males: GM: r= .73; GF r=.36; Scale 5 r = .81  Females: GM: r= .39; GF r=.45; Scale 5 r = .73   1. NR 2. Correlations with scale 5   Male: GM r= -.19; GF r= .43  Female: GM r= -.16; GF r= .74  Correlations of GM with GF: r= -.13 (both sexes)   1. GM & GF are unipolar, independent (r= .13)  - Male: GM median= 38, GF median= 28 - Females: GM median= 29, GF median= 31  1. NR 2. Other   Mean raw scores  GM: males: mean = 37.87, SD= 4.87          females: mean = 28.83, SD= 6.51  GM-S: males: mean = 33.9, SD= 4.36             females: mean = 25.79, SD= 5.79  GF: males: mean = 23.67, SD= 6.06          females: mean = 30.91, SD= 5.77    Age trends  Men (mean GM & GF scores by decade):   - 20s: GM ≈ 28.5; GF ≈ 23.0 - 30s: GM ≈ 27.9; GF ≈ 23.8 - 40s: GM ≈ 27.7; GF ≈ 24.6 - 50s: GM ≈ 27.5; GF ≈ 25.2 - 60s: GM ≈ 27.4; GF ≈ 25.9 - 70s: GM ≈ 27.2; GF ≈ 26.5   Women (mean GM & GF scores by decade):   - 20s: GM ≈ 29.0; GF ≈ 30.0 - 30s: GM ≈ 28.8; GF ≈ 30.5 - 40s: GM ≈ 28.6; GF ≈ 31.0 - 50s: GM ≈ 28.5; GF ≈ 31.2 - 60s: GM ≈ 28.3; GF ≈ 31.4 - 70s: GM ≈ 28.2; GF ≈ 31.6     Raw score means and SD by gender role quadrant  Males (N = 1,133)   - Stereotyped Masculine (High GM, Low GF): M = 24.6, SD = 5.9 - Stereotyped Feminine (Low GM, High GF): M = 34.9, SD = 6.7 - Androgynous (High GM, High GF): M = 29.4, SD = 6.2 - Undifferentiated (Low GM, Low GF): M = 29.1, SD = 6.1     Females (N = 1,462)   - Stereotyped Masculine (High GM, Low GF): M = 29.6, SD = 5.8 - Stereotyped Feminine (Low GM, High GF): M = 39.1, SD = 6.9 - Androgynous (High GM, High GF): M = 34.3, SD = 6.4 - Undifferentiated (Low GM, Low GF): M = 34.1, SD = 6.3   Scales: GM- gender role, masculine/ GF- gender role, feminine  GM-S (shortened version- 42 items) | - 1. Items measure sex-typed traits based on men’s/women’s endorsement patterns, classifying individuals as masculine, feminine, androgynous or undifferentiated   2. Uses two independent scales (GM, GF) unlike MMPI-2’s single continuum   Limitations: Reflects 1980s U.S. norms, self-report bias, and does not assess gender identity or external perception |
| 25. Normative Male Alexithymia Scale (NMAS); 2006; Levant, R F et al., *Psychology of Men & Masculinity*; USA/NR/NR; English  **Used by:**  Adult men, attitudes towards seeking professional psychological help  (Sullivan et al. 2014) | 1. Researchers in regards to mild (subclinical) alexithymia and practitioners and their male clients with an assessment tool 2. To assess normative male alexithymia 3. Males    1. St1: n= 266 M, St2: n= 407 (192M + 210 W+ 5NR)    2. South central university in USA    3. St1: White (84%); St2: Caucasian (81%), Hisp-Lat (10%), A-Af (3%), Asian-Am (3%), Other (2%), NR (2%)    4. Students in Intro psych class (for both studies)    5. St1:100%, St2: 47%M    6. NR    7. Pursuing university degrees    8. St1: NR, St2: MC, UMC, UC (90%), Family income of 60k+ (64%)    9. St1: NR, St2: mar (4%), single (56%), div (.5%), seriously dating (38%)    10. Age: St1: range 18-22 (93%); St2: 17-20 (91%), 21-24 (8%), 25-45 (1%)/ Sexual orientation: St1: NR ; St2: homosexual (3%), heterosexual (89%), bisexual (6%) | 1. 20 items 2. Likert type format (1- strongly disagree to 7- strongly agree) 3. Not applicable 4. Survey 5. Administrator: calculating scores, Respondent: est. time to complete not given, self report 6. 7 items reverse scored with total scale score calculated from average, higher scores= greater normative male alexithymia 7. Original items available as supplement to publication | 1. Total α= NR    - - - 1. CFA- NMAS scores: Males: α = .92, Females: α= .93          2. NMAS total scores: Men: .91, Females: .86 1-2 month period          3. NR 2. NMAS strongly correlated with: TAS-20: r=.72, MRNI: r= .35, MRNI-REM: r=.50 3. Total: 20 it, 1 factor   NMAS: males: F = 37.7, p< .0001, TAS-20: males: F=11.2, p< .001   1. NR 2. Other | 1. Items appear to directly address mild emotional restrictions, such as difficulty recognizing and describing emotions, which aligns with the conceptualization of normative emotional traits in men 2. Limitations: sample was restricted to one institution, primarily male, US college students, limiting generalizability. Self-report method used, raising concerns of bias or social desirability |
| 26. Personal Attributes Questionnaire; 1975; J Spence, R Helmrich, & J Stapp., *Journal of Personality and Social Psychology*; USA/Texas/ University of Texas; English  **Used by:**  Adults 37-70 with MI, social support with recovery  (Helgeson et al. 1991)  Parents, involvement in child-oriented activities  (McHale et al. 1984)  Medical students, adjustment & interpersonal functioning in med school  (Zeldow et al. 1987) | 1. **Researchers and psychologists** to assess how individuals identify with culturally defined **masculine (instrumental)** and **feminine (expressive)** traits 2. To measure masculinity and femininity characteristics represented as instrumentality for male valued traits and as expressivity for female valued traits 3. Students    1. N= 530    2. Austin, Texas    3. NR    4. University of Texas: UG-Intro Psych class    5. 46.8%M, 53.2%F    6. NR    7. University students (pursuing university degrees)    8. NR    9. NR    10. NR | 1. 24 items, with 3 subscales 2. 5 point scale (‘very’ to ‘not at all’) 3. Not specified 4. Survey, in person and through mail 5. Administrator: scoring can be done manually, Respondent: relatively low, taking several minutes to complete 6. Most extreme masculine or feminine items scored as 4, next most extreme is 3 7. Psychometric score: medium, ease of use score: low | 1. Total α= NR    1. Male valued: α= .85 M, α= .94 F   Female valued: α= .79 M, α= .84 F  Sex specific: α= .53 M , α= .85 F   - Item total correlations (part whole): ranged from r= .19 to .70 for every item in both samples   1. NR   2. NR  1. Mean, SD and p values for self and stereotypes measures  - Self   Male valued traits( M/SD): Males: 60.61/ 10.39, Females: 57.73/10.87, p value: .003 ; female valued traits (M/SD): Males: 48.73/ 7.61, Females: 53.16/6.55, p value: .000; Sex specific traits (M/SD): Males: 27.21/ 5.24, Females: 22.34/5.66, p value: .000   - Stereotype: Male valued traits( M/SD): Males: 59.09/ 8.19, Females: 57.49/ 7.08, p value: .02; Female valued traits (M/SD): Males: 47.04/5.00, Females: 45.37/5.77, p value: .002; Sex specfic traits( M/SD): Males: 36.42/4.70, Females: 35.45/4.33, p value: .018 - Attitudes towards women( M/SD): Males: 60.61/ 10.39, Females: 57.73/10.87, p value: .000 - Self-esteem( M/SD): Males: 81.54/16.99, Females: 83.24/17.56, p value: .270  1. Self rating scale correlations  - Male valued and female valued: .47 M, .14 F - Male valued and sex specific: .52 M, .63 F - Femaled valued and sex specific   Self ratings and AWS:  Male valued: -.15, p < .05; Female valued: .30, p < .05; Sex specific: -.16, p < .05  Self esteem correlations:  Male valued: r= .77 M, .83 F; Female valued: r= .42 M, .30 F; Sex specific: r= .48 M, .47   1. NR 2. Other | 1. Items assess sex-typed traits (masculine: independent, active; feminine: gentle, understanding), capturing gender-role expression via through self-reported alignment with culturally defined instrumental (masculine) and expressive (feminine) attributes. 2. Based on theoretical assumptions about psychological gender roles rather than biological sex. Designed to measure androgyny as the additive presence of both masculine and feminine traits. **Limitations:** Not based on systematic sampling of all possible gendered traits; item pool reflects 1970s U.S. gender norms (generalizability), Self-report design is susceptible to social desirability bias, does not assess gender identity or external perceptions (e.g., how others view one’s gender traits). |
| 27. Self- Perceived Gender Expression (W5); 2010; Wylie, S A et al., *Sex Roles*; USA/ Massachusetts, Maryland/ Harvard School of Public Health, John Hopkins University Bloomberg School of Public Health; English  **Used by:**  Adults, MH  (Tabler, et al. 2021) | 1. To use on studies of health disparities including statewide and national public health surveillance tools 2. To act as brief self-report measure of current socially assigned gender expression appropriate for use in large scale population based health surveillance 3. Adolescents and Young Adults    1. n= 82    2. Boston, New England    3. Hisp-Lat (9.8%), Am-Ind (1.2%), Asian (11%), White (62.2%), Multiracial (8.5%), NR (1.2%)    4. NR    5. Born male, doesn’t identify as male (7%), Born female, doesn’t identify as female (14.6%), Born female, identify as female (47.6%), Born male, identify as male (30.5%)    6. NR    7. High school or lower (12.2%), College or trade vocational school (29.3%), Bachelors degree or higher (58.5%)    8. NR    9. NR    10. Age: mean= 23.8 ± 3.2/ Sexual orientation: transgender (22%), heterosexual (29.3%), bisexual (11%), mostly heterosexual (17.1%), mostly homosexual (11%), Not sure (6.1%), NR/Other (3.7%) | 1. 2 questions 2. 7 point Likert-like scale, respondents rate how masculine or feminine people would describe their appearance and mannerisms 3. N/A 4. Self report questionnaire, telephone interview , in person interview 5. Administration: relatively low, must assign scale to rankings for quantitative analysis, Respondent: very low, only 2 questions to complete 6. Numbers assigned to scale (0= very feminine, 6= very masculine), mean score determined to obtain average of perceived gender expression 7. Scale available through publication | 1. Bottom of FormTotal α= NR    - - - 1. Spearman consistency: nontransgender F: r=.74; nontransgender M: r=.68   Transgender groups: r=.39, F sexual minorities: r=.44, , M sexual minorities: r=.47, hetero F: r=.80, hetero M: r=.90   - - - - 1. NR         2. NR  1. MANOVA test: Females: R2: appearance= .63, mannerisms= .56; Males: R2: appearance= .72, mannerisms= .57 2. Females: r =.74, p < .0001, Males: r= .68, p= .0002, Born female, not identifying as female: r=.39, p=.20, Born male, not identifying as male: r=.39, p=.44 3. NR | 1. Items assess socially assigned gender expression based on appearance and mannerisms (e.g., “How do others perceive your appearance?”) to capture gender nonconformity as perceived by others, not self. 2. Limitations: Cross-sectional design; does not assess lifetime or childhood gender expression. Small sample sizes in racial/ethnic and transgender subgroups limit generalizability and intersectional analysis |
| 28. Sex-Typed Behaviours and Attitudes Score; 2001; Cleveland, H.H., et al, *Personality & Social Psychology Bulletin;* USA/Las Vegas, North Carolina/ University of Nevada, University of North Carolina ; Enlgish  **Used by:**  Youth, SI  (Nowotny et al. 2015) | 1. Researchers to investigate correlations between gender role adherence and various psychological outcomes, such as self-esteem and mental health. To construct sex-typed behaviors and attitudes score from the probability that an adolescent is a male or female 2. Sibling pairs    1. n= 1301    2. NR    3. Recorded in pairs: White (54%), A-Af (23%), Hisp-Lat (14%), Asian (7%), Am-Ind or other (2%)    4. NR    5. 40.5%M pairs, 21.5% half M and half W pairs    6. NR    7. NR    8. NR    9. NR    10. Age: mean of first sibling= 16.7, mean of second sibling= 16.8/ Male pairs: MZ (7.6%), DZ (7.3%), FS (17.8%), HS (5.2%); Female pairs: MZ (8.3%), DZ (7.3%), FS (20%), HS (4.8%); Middle Sex pairs (1 male, 1 female); DZ (5.6%), FS (12.3%), HS (3.7%) | 1. 16 self report items 2. Likert-like scale from 0 to 3 or 4 (variable dependent) 3. Not applicable 4. Questionnaire 5. Administrator burden: variables available as supplement to publication, must perform logistic regression and analyses, Respondent: No est. time of completion given 6. Logistic regression used the 16 sex-typical traits to predict the likelihood of being female. A post hoc test then measured how many predictions were correct and calculated the accuracy percentage 7. Data obtained from Wave II of the Add Health Study | 1. Total α= .83    - - - 1. NR          2. NR          3. NR 2. NR 3. Males: 25% var by genetic influences, 75% var nonshared env influences and measurement error   Females: 38% var by genetic influences, 62% var nonshared env influences and measurement error   1. NR 2. Other   Intrapair correlations:  Males: MZ: .30, DZ: .20, FS: .08, HS: .02  Females: MZ: .46, DZ: .22, FS: .15, HS: .20 | 1. Items capture adolescent sex-typical behaviors and attitudes, reflecting genetic and environmental influences 2. Uses twin/sibling comparisons to estimate heritability and environmental contributions to sex-typed behavior   Limitations: Non-systematic item selection, Cross-sectional U.S sample (cultural limits), no identification of specific environmental factors |

*Abbreviations:* **A-Af =** African American; **Am-Ind=** american-indian; **Andro** = androgyny; **Anx=** anxiety; **Asian =** Asian or Asian American; **Aut**= Autistic **bwt** = between; **Body Diss** = body dissatisfaction; **CC** = correlation coefficience; **Cis**= cisgender; **C1O**=class 1 obesity (30-34.9BMI); **C2O**= class 2 obesity (35-39.9 BMI); **C3O**= class 3 obesity (40+ BMI); **conform =** conformity; **CVD**= family history of cardiovascular disease;  **div** = divorced; **depr=** depression; **DL**= dyslipidemia; **DZ**= dizygotic twins; **Edu=** education; **Eigenv =** Eigenvalue; **EM**= employed; **ENG**= English class; **Euro-Am =** European American; **EDI-2 =** Eating Disorder Inventory-2 Scales; **Fem** = femininity; **FR** = Freshman; **FS**= full-siblings; **GR**= grade **Intero** = Interoceptive; **it =** items; **h²** = commonality in factor analysis; **HI**= high income; **Nat-Haw**= Native Hawaiian; **High SES**= high socioeconomic status; **Higher edu lvl**= Respondent has a higher education level than partner; **Hisp-Lat** = Hispanic/Latina; **HS=** highschool students;**Hs vs ls**= high scorers vs low scorers; **HTN**= hypertension; **Int SES**= intermediate socioeconomic status**; Intro psych class**= students in introductory psychology class**; JR** = Junior; **LC**= lower class; **LI=** lower income; **LMI=** lower middle income; **LMC=** lower middle class; **Low SES**= low socioeconomic status; **Low edu lvl=** respondent has a lower education level than partner; **MA-Couns Psych** = Master’s in Counseling Psychology; **mar =** married; **Mas** = masculinity; **MC** = middle class; **Mid I**= middle income; **MI**= myocardial infarction; **Multi race**= Multiple races; **MZ**= monozygotic twins; **Nat-Am** = Native American; **nonconform =** nonconformity; **NB**= nonbinary **NR** = Not Reported; **OB=** obesity; **Same edu lvl**= Same level of education as partner or no partner; **singl** = single; **Ret=** retired; **Sig**= significant; **SO =** Sophomore; **SR** = Senior; **St =** Study; **TIA**= transient ischemic attack; **TN**= town; **UEM**= unemployed; **UG =** Undergraduate; **UG–Intro Bio class** = Undergraduate students in an Introductory Biology class; **UC**= upper class; **UMC=** upper middle class; **Var Exp** = Variance explained; **Trad =** traditional; **trans**= transgender; **W-comm** = Women in the community; **wk =** week

Gender refers to the socially constructed *roles, behaviours, expressions and identities* of girls, women, boys, men, and gender diverse people. It influences how people perceive themselves and each other, how they act and interact, and the distribution of power and resources in society. Gender identity is not confined to a binary (girl/woman, boy/man) nor is it static; it exists along a continuum and can change over time. There is considerable diversity in how individuals and groups understand, experience and express gender through the roles they take on, the expectations placed on them, relations with others and the complex ways that gender is institutionalized in society [CIHR; https://cihr-irsc.gc.ca/e/48642.html]

Sex refers to a set of biological attributes in humans and animals. It is primarily associated with physical and physiological features including chromosomes, gene expression, hormone levels and function, and reproductive/sexual anatomy. Sex is usually categorized as female or male but there is variation in the biological attributes that comprise sex and how those attributes are expressed [CIHR; <https://cihr-irsc.gc.ca/e/48642.html>]

In human populations, collection of data on sex as a biological variable should be accompanied by collection of data on gender. The panel acknowledges that sex as a biological variable is often meaningful to measure in surveys, research studies, and clinical settings as it can affect the health and well-being of people or populations in terms of reproductive anatomy, biologic mechanisms linked to hormones, cell physiology, metabolism, and chromosomal configurations in biological systems.

However, because these aspects of sex may differ from each other and do not exclusively determine gender, standard binary measures of sex are an inadequate proxy for the primary measurement of gender and sex traits, especially among sexual and gender diverse populations. (NIH statement).
