# Supplementary material for: Systematic review of instruments for measuring sex and gender attributes: Assessment of measurement properties and utility in research on clinical and functional outcomes
Source: Research Square preprint supplement (doi:10.21203/rs.3.rs-7754711/v1), 2025-10-15
Supplement: Supplementary file 6 [file 7ae60565ab0e272505b11882.docx]

Table 4. Summary of psychometric properties evaluated for instruments measuring attributes of sex and gender

|  | Reliability | | | |  | | Validity | | Reproducibility | | | | |
| --- | --- | --- | --- | --- | --- | --- | --- | --- | --- | --- | --- | --- | --- |
| Gender Measure | Respondent burden/EMERGE Rating | Internal | Test-retest | Measurement error | | Construct | | Structural | | Open access | Item clarity | Scoring transparency | Administration  guidelines |
| *Measures of masculinity, femininity, and androgyny traits* | | | | | | | | | | | | | |
| BSRI | 10 -15 mins/Partial | + | + | + | | + | | + | | + | + | + | + |
| PAQ | NR/Partial | + | - | + | | + | | + | | + | - | + | - |
| GENESIS-PRAXY | CA | - | - | - | | + | | - | | - | CA | CA | CA |
| MCD-I | CA/NR | + | - | + | | + | | + | | - | ca | ca | ca |
| MGS | CA/NR | - | - | + | | + | | - | | - | ca | ca | ca |
| dms | NR/NR | + | + | + | | + | | + | | + | + | + | + |
| Macho Scale | NR/Partial | + | - | - | | + | | - | | + | - | + | - |
| Fem score | NR | - | - | - | | - | | + | | + | NA | + | NA |
| Masc Measure | CA/NR | - | - | - | | - | | + | | - | CA | CA | CA |
| Sex-Typed Behav & Attitudes Score | CA/NR | - | - | - | | + | | + | | - | CA | CA | CA |
| *Measures of gender role attitudes and norm conformity* | | | | | | | | | | | | | |
| ATWS | nr/nr | + | + | - | | + | | - | | - | CA | CA | CA |
| ATWS- 15 item | NR/NR | + | + | - | | + | | + | | + | - | + | + |
| CFNI | ca/NR | + | + | + | | + | | + | | - | CA | CA | CA |
| CMNI | 10-15 mins/NR | + | + | + | | + | | + | | + | + | + | - |
| CMNI-22 | ca/NR | + | + | + | | + | | + | | - | ca | CA | CA |
| FIS | NR/Partial | + | - | + | | + | | + | | + | + | + | - |
| GEM Scale | NR | + | - | + | | + | | + | | + | + | + | - |
| GVNCS | NR | + | - | - | | - | | - | | + | - | + | + |
| MRAS | NR/Partial | + | - | + | | + | | - | | + | - | + | - |
| MRNI | NR/partial | + | - | - | | + | | + | | + | **+** | **+** | **+** |
| MMPI-2 | ~35 mins/NR | + | Partial | - | | + | | - | | - | CA | CA | CA |
| *Measures of gender role conflict* | | | | | | | | | | | | | |
| GRCS | NR/Partial | + | + | - | | + | | + | | + | + | + | + |
| MGRDSS | 30 mins/NR, Full | + | - | + | | + | | + | | + | + | - | + |
| NMAS | CA/NR | + | + | + | | + | | + | | - | CA | CA | CA |
| *Measures of gender expression* | | | | | | | | | | | | | |
| GSR | NR | + | - | + | | + | | + | | + | + | + | + |
| Self-Perceived GE (W5) | NR/NR | + | - | - | | + | | - | | + | + | + | + |

| Sex measure | Sensitivity | Specificity | Measurement error | Reproducibility (CV) | Cost | Measurement/calc transparency | Administration guidelines |
| --- | --- | --- | --- | --- | --- | --- | --- |
| PHI | **+** | **+** | **+** | **-** | **+** | **+** | **+** |
| DI-SQ Score | **+** | **+** | **+** | **+** | **+** | **+** | **+** |
| PGS | **+** | **+** | **+** | **+** | **+** | **+** | **+** |
| Testosterone levels | **+** | **+** | **+** | **+** | **+** | **+** | **+** |
| DHEAS | **+** | **+** | **+** | **+** | **+** | **+** | **+** |
| SHBG | **+** | **+** | **+** | **+** | **+** | **+** | **+** |
| FAI | **+** | **+** | **+** | **+** | Partial | **+** | NA |
| AR polymorphism | **+** | **+** | **+** | **-** | **+** | **+** | **+** |

Abbreviations: **CA** = cannot access, **CV** = coefficient of variance, **NA** = not applicable
