# Supplementary material for: Systematic review of instruments for measuring sex and gender attributes: Assessment of measurement properties and utility in research on clinical and functional outcomes
Source: Research Square preprint supplement (doi:10.21203/rs.3.rs-7754711/v1), 2025-10-15
Supplement: Supplementary file 7 [file 8db7922f64bdab28692f1813.docx]

**Table 1.** Study and sample characteristics, including measures used to capture effect of sex and/or gender attribute

| Author (year); Journal | **Study characteristics**   1. Country; region; city; location of research 2. Study objective 3. Sex or gender consideration in outcome 4. Source of informed consent/language of consent | **Sample characteristics**  (1) Place of residence of research participants  (2) Race/ethnicity/culture/language  (3) Occupation  (4) Gender/Sex (%M)  (5) Religion  (6) Education  (7) Socioeconomic status  (8) Social capital  (9) Plus parameters | **Attribute, instruments used**   1. Assay; specimen; unit/measurement range/calculation 2. Gender attribute; domains; measure | **Results**  (1) Sex attribute-related results  (2) Gender attribute-related results  (3) Researcher(s) notes (related to sex attribute or gender attribute) |
| --- | --- | --- | --- | --- |
| 1. Allamaneni, SSR, et al. (2004); *Fertility and Sterility* | 1. USA; Ohio; Cleveland; clinic 2. Determine whether semen qual scores can be used to predict preg rates after donor insemination 3. Research concerns sex 4. Written/NR | 1. NR 2. NR 3. NR 4. 24% M 5. NR 6. NR 7. NR 8. NR 9. NR | **DI-SQ scores**   1. PCA of 5 semen parameters: concentration, motility, curvilinear velocity, linearity, and amp of lateral head displacement evaluated prefreeze & postthaw; semen sample from STD neg donors cryopreserved and quarantined for 6 mos; PCA value 2. NR | 1. **↑** DI-SQ score was pos assoc with preg (P=.03) and live birth rates 2. NR 3. DI-RQ score assoc with preg in donor samples was NS |
| 1. Arcand A. (2023); *Front Psychol* | 1. Canada; Quebec; Montreal; Community; 2. Examine effects of sex & GR on stress, depr, anx during COVID-19 3. Research concerns sex effects 4. Written/NR | 1. Quebec 2. NR 3. NR 4. 33% M 5. NR 6. NR 7. NR 8. NR 9. Age: mean 36.75±1.40 yrs (M), 31.21±0.93 yrs (F) | 1. NR 2. **BSRI-SF**   Self sex role identification; masculine, feminine, and gender neutral traits; score from self-report Likert scale questionnaire | 1. NR 2. No sex/gender effects on depr; F w high fem had **↑** stress than M w high fem at t1;F w low fem had **↑** anx than M w low fem at t4 3. F had more Sx of stress & anx than M; no assoc b/w masc traits & stress, anx, or depr |
| 1. Azizi, Z., et al. (2021); *Cdn J of Cardio* | 1. Canada; Austria; community 2. Explore assoc btwn sex, gender, and CVH 3. Research concerns sex and gender 4. NR;NR | 1. Canada; Austria 2. NR 3. 17% self employed, 83% employee, 20% part-time, 80% full time; 68% self employed, 32% employee, 27% part-time, 73% full time 4. 45%; 44% 5. NR 6. 24% < secondary, 20% secondary, 5% post secondary, 52% > post secondary; 12% < secondary, 20% secondary, 52% post secondary, 16% > post secondary 7. 10% low household income, 40% medium, 50% high; 36% low household income, 21% medium, 50% high 8. 30% single, 20% div/wid, 50% common-law/married; 30% single, 15% div/wid, 55% common-law/married 9. Age: 10% < 20, 32% 20-49, 17% 50-59, 20% 60-69, 21% >=70; 4% < 20, 50% 20-49, 22% 50-59, 14% 60-69, 10% >=70 | 1. NR 2. **GENESIS-PRAXY Gender Index**   Measure gender in ACS patients; gender identification, socio-economic standing, social roles and psychosocial questions measuring emotions; logist regression coeff estimates of variables associated with sex used to calculate score | 1. NR 2. Soc-cult gender, ref to personality traits and soc characteristics typically ascribed to W, is associated with poorer CVH and **↑** prevalence of heart disease regardless of sex. In contrast, F exhibited better CVH and **↓** prevalence of heart disease than M 3. A gender score can be created with different gender-related factors depending on the study pop |
| 1. Boeri L, et al. (2017); *J Sex Med* | 1. Italy; Milan; Academic hospital 2. Examine impact of low cFT/low TT on androgen-related Sx 3. Research concerns sex diff 4. Signed by patients; NR | 1. NR 2. 100% European Caucasian 3. NR 4. 100% M 5. NR 6. NR 7. NR 8. NR 9. Age: range 18-70 yrs | 1. **TT**   CLIA; venous blood samples drawn from 7 to 11 am after overnight fast from heterosexual, sexually active, European Caucasian M assessed for ED; ng/mL,  **cFT**  calc from SHBG, albumin thru CLIA; venous blood samples drawn from 7 to 11 am after overnight fast from heterosexual, sexually active, European Caucasian M assessed for ED; cFT = ([T] - (N X [FT]))/(Kt {SHBG - [T] + N[FT]}), Albumin = KaCa X cFT, ng/mL   1. NR | 1. TTnorm+cFTlow, TTlow+cFTlow had **↓** IIEF-EF, IIEF-SD, IIEF-OF, **↑** BDI 2. NR 3. Low cFT values indep predicted IIEF-EF, IIEF-SD, IIEF-OF, BDI, irrespective of TT level |
| 1. Cunningham ML, et al. (2020); *Body Image .* | 1. Australia; New South Wales; Sydney; Community 2. Examine indirect pathway linking masc discrepancy stress to MD Sx via emotion dysreg 3. Research concerns GR discrepancy 4. Provided by participants; NR | 1. 60.9% Australia 2. Region of birth (48.3% Australia, 18.4% North America, 17.4% Asia), language (71.7% English, 13.4% Chinese) 3. NR 4. 100% M 5. NR 6. NR 7. NR 8. NR 9. a. Age: range 18-50, mean 22.06 ± 5.34 years 10. Sexual orientation: 75.9% heterosexual | 1. NR 2. **MGRDSS**   Gender role discrepancy stress, gender role discrepancy and discrepancy stress, mean score from self-report Likert scales | 1. NR 2. Masc discrepancy stress had sig pos assoc w MD; Sig indirect pathway from masc discrepancy stress to MD Sx via emotion dysreg 3. Lack of emotion reg strategies is potential pathway b/w masc discrepancy stress & MD Sx |
| 1. Diaz FD, et al. (2020); *Psych of Men & Masc* | 1. USA; Nevada; Las Vegas; Michigan; Detroit; university 2. Evaluate potential long-term impact of late PT on DM by examining assoc btwn PT and DM 3. Research concerns M sex and MD 4. Obtained from participants; NR | 1. NR 2. non-Hispanic/Latino White (37.5%), Hispanic/Latino White (15.0%), multiracial (18.0%), Asian (17.6%), Black or African American (7.1%), Middle Eastern (2.1%), Native Hawaiian or Other Pacific Islander (1.1%), American Indian or Alaska Native (1.1%) 3. all students 4. 100% M 5. NR 6. All from uni 7. Avg household income/ yr: under $20,000 (16.7%), $20,000 to $40,000 (19%), $40,000 to $60,000 (24.9%), $60,000 to $100,000 (19%), and over $100,000 (20.4%) 8. NR 9. Age: mean 20.99 (4.14) yrs | 1. NR 2. **DM Scale**   drive for muscularity; body image and behaviors; score from self-report Likert scales | 1. NR 2. LPT was predic of DM; however, sig effects were largely only present for behav aspects of muscle building and when objective reports of PT (e.g., age of onset), rather than perceived timing, were used 3. LPT may exhibit some differential effects on various types (behavioral vs. cognitive) of DM sx |
| 1. Dumesic DA, et al. (2019); *J Clin Endocrinol Metab* | 1. USA; California; Los Angeles; Academic hospital 2. Examine relationship b/w TT & adipose**-**IR in F w PCOS & controls 3. Research concerns F sex 4. Signed by subjects/English | 1. NR 2. 100% non-Hispanic white 3. NR 4. 0% M 5. NR 6. NR 7. NR 8. NR 9. Age: range 19-35 | 1. **TT**   LC-MS/MS; fasting blood samples from control subjects during follicular phase and PCOS group during oligo-anovulation, all white women w PCOS; ng/dL  **cFT**  concentrations of total testosterone, SHBG, and albumin; pg/dL  **SHBG**  NR;fasting blood samples from control subjects during follicular phase and PCOS group during oligo-anovulation, all white women w PCOS; nmol/L   1. NR | 1. TT & free T levels has pos assoc w adipose-IR in control+PCOS 2. NR 3. Pos assoc of adipose-IR w androgen levels suggests *in vivo* effect of androgens on adipocyte function |
| 1. Esiaka, D., et al. (2022); *Comm Health Equity Res & Policy* | 1. Nigeria; community 2. Examine dem and psychosoc factors influencing early cancer detection behaviors among Nigerian men 3. Research concerns gender 4. NR; NR | 1. NR 2. NR 3. NR 4. 100% M 5. NR 6. 96% >12 yrs 7. NR 8. 55% married 9. Age: mean 44.7 (6.1) yrs | 1. NR 2. **MRNI**   Endorsement of TM ideology; avoidance of femininity, negativity toward sexual minorities, self-reliance through mechanical skills, toughness, dominance, importance of sex, restrictive emotionality; self-report Likert scale questionnaire | 1. NR 2. Neg assoc of masculinity with current cancer detection behaviors; pos assoc btwn current cancer detection behaviors and education 3. Continuous recognition of influence of soc norms on cancer detection behaviors can help inform dvlpment of promotion of early cancer detection behaviors |
| 1. Gibson PA, et al. (2016); *J Affect Disord* | 1. USA; Community 2. Investigate relationship b/w sex, gender, education on depr in young adults 3. Research concerns sex and GR effects on depr 4. NR; NR | 1. NR 2. 53.66% White, 20.22% Black, 16.25% Hispanic, 9.87% other 3. NR 4. 40% M 5. NR 6. Parent’s education: 13.60% < HS, 37.42% HS, 48.98% > HS 7. NR 8. Family status in adolescence: 65.07% lived with both parents, 29.43% lived with one parent, 5.50% other arrangements 9. Age: mean F 21.95 (1.74), M 22.28 (1.68) yrs | 1. NR 2. **BSRI-SF**   Self sex role identification; masc, fem, and gender neutral traits; score from self-report Likert scale questionnaire | 1. NR 2. Fem in F & M was negatively assoc w depr; M w high masc had ↓ depr Sx; F w high masc showed NS assoc w depr 3. In M & F, fem supported ↓ depr Sx compared to masc |
| 1. Green MA, et al. (2008); *Eating Disord* | 1. USA; Mt. Vernon; Iowa; University 2. Examine conformity to trad fem norms as predictor of ED sx 3. Research concerns gender norms 4. NR; NR | 1. NR 2. 79% Caucasian, 9% African American, 1% Latin American, 5% multi-racial American, 2% biracial American, 1% intl, 2% other 3. All students 4. 0% M 5. NR 6. All undergraduate students 7. NR 8. NR 9. Age: range 17-23, mean 19.92 (1.34) yrs | 1. NR 2. **CFNI**   Feminine norm conformity; domains of niceness in relationships, modesty, domesticity, sexual fidelity, care for children, romantic relationship, thinness, investment in appearance; score from self-report Likert scale questionnaire | 1. NR 2. Thinness subscale of CFNI contributed a statistically significant portion of variance in global EDE-Q scores 3. Conformity to trad GN assoc w **↑** ED sx |
| 1. Helgeson VS. (1991); *Psychosom Med .* | 1. USA; Colorado/New York; Denver/Long Island; Hospital 2. Investigate relationship b/w masc & social support w recovery from MI 3. Research concerns masculinity 4. Obtained from physician and patients signed consent form; NR | 1. NR 2. NR 3. 37% retired 4. 78% M 5. 62.6% Catholic, 18.9% Jewish, 17.8% Protestant, 1.1% atheist 6. 37.8% HS, 25.6% some college, 8.9% college, 7.8% post grad 7. Median family income btwn $30 000 - $40 000 8. 82.2% married 9. Age: range 37-70, median 59.5 | 1. NR 2. **PAQ**   Masculinity and femininity characteristics, instrumentality and expressivity, score from self-report scale questionnaire | 1. NR 2. Masc did not sig predict perceived health; masc was sig predictor of post-MI chest pain 3. Spouse disclosure was most sig indep predictor of chest pain, health perception |
| 1. Hoyt, M.A., et al. (2013); *Health Psychol* | 1. USA; New York, California; New York City, Los Angeles; community 2. Determine whether CMT predicts prostate-related functioning over time, and whether cancer-related EAC processes explain this 3. Research concerns sex 4. NR; NR | 1. NR 2. 85% white, 11% black, 3% Hispanic/Latino, 2% Native American 3. 35% full time, 11% part time, 48% retired, 6% unemployment/disability 4. 100% M 5. NR 6. 11% HS, 21% some post HS, 9% 2 yr college deg, 26% 4 yr college deg, 33% advanced deg 7. Annual household income: 3% $15,000 or less; 9% $15,001-$45,000; 26% $45,001-$75,000; 22% $75,001-$100,000; 40% $100,001 or more 8. 89% married/partnered, 8% wid/div, 3% single 9. Age: mean 65.76 (9.04) yrs | 1. NR 2. **MRNI**   Endorsement of TM ideology; avoidance of femininity, negativity toward sexual minorities, self-reliance through mechanical skills, toughness, dominance, importance of sex, restrictive emotionality; self-report Likert scale questionnaire | 1. NR 2. CMT predicted ↓ in urinary (B = −.21, p < .05), bowel, and sexual function. CMT also predicted ↓ emotional processing. ↓ emotional processing predicted ↓ prostate-related. ↓ coping self-efficacy was mechanism by which CMT predicted emotional processing. 3. The extent to which men believe cancer is inconsistent with their masculinity exacerbates declines in prostate-related functioning following cancer treatment |
| 1. Hunt K, et al. (2006); *Soc Psychiatry Psychiatr Epidemiol* | 1. UK; Scotland; Glasgow; Community 2. Investigate relationship b/w gender & SI in three generational cohorts (1930, 1950, 1970) 3. Research concerns gender and SI 4. NR; NR | 1. Glasgow, Scotland 2. NR 3. NR 4. 45% M 5. NR 6. NR 7. NR 8. NR 9. Age: Age-based cohorts at t0: 15, 35, 55 | 1. NR 2. **BSRI-SF**   Self sex role identification; masculine, feminine, and gender neutral traits; score from self-report Likert scale questionnaire | 1. NR 2. In M & F, masc was assoc w SI in 1930/1950 cohorts; fem was not assoc w SI in any age cohorts in M or F 3. In early, late middle age, M & F w high masc report ↑ SI; no relationship b/w fem & SI in M or F at any age |
| 1. Hunt K, et al. (2007); *Int J Epidemiol* | 1. UK; Scotland; Glasgow; Community 2. Investigate relationship b/w GRO & CHD mortality 3. Research concerns gender and mortality 4. NR; NR | 1. Glasgow, Scotland 2. NR 3. NR 4. 45% M 5. NR 6. NR 7. Mean household income: 171.31 (102.94) M, 149.02 (84.46) F 8. NR 9. Age: 55 years | 1. NR 2. **BSRI-SF**   Self sex role identification; masculine, feminine, and gender neutral traits; score from self-report Likert scale questionnaire | 1. NR 2. In M w high fem, ↓ risk of CHD mortality; in F w high fem & in M & F w high masc, NS relationship w CHD mortality 3. Relationship b/w ↓ fem & ↑ CHD mortality in M, not F; NS assoc b/w masc & CHD mortality in M & F |
| 1. Iwamoto D, et al. (2018); *Am J Mens Health* | 1. USA; Maryland; College Park; University 2. Examine relationship b/w masc norm conformity & depr Sx in young men 3. Research concerns gender conformity 4. Informed consent form; NR | 1. NR 2. White/Caucasian American (184; 57.1%), Chinese American (29; 9%), “Other” (27; 8.2%), African American (24; 7.5%), South Asian American (e.g., Indian, Pakistani; 24; 7.5%), Latino/Hispanic (18; 5.6%), Korean American (16; 5%) 3. 100% uni students 4. 100% M 5. NR 6. 100% uni freshmen 7. NR 8. NR 9. Age: range 18-20, mean 18 ± 0.38 yrs | 1. NR 2. **CMNI**   Masculine norm conformity; domains of winning, emotional control, risk-taking, violence, dominance, playboy, self-reliance, primacy of work, power over women, disdain for homosexuals, pursuit of status; score from self-report Likert scale questionnaire | 1. NR 2. Adherence to playboy, self-reliance, violence norms had pos assoc w depr; adherence to winning & power over women norms had neg assoc w depr 3. Sig relationship b/w depr severity & distinct masc norms in young men |
| 1. Kerr P, et al. (2021); *J Psychosom Res* | 1. Canada; Quebec; Montreal; Hospital 2. Measure effect of gender roles on MH & workplace stress in psychiatric hospital workers 3. Research concerns gender roles 4. NR; NR | 1. NR 2. NR 3. All hospital workers; 11% clinical, 17% admin, 14% research, 11% soc integ, 11% maintenance, 4% gen dir, 3% HR 4. 29% M 5. NR 6. Mean yrs schooling: W 16.5 (0.26), M 16.2 (0.51) 7. NR 8. Partnered: W 58%, M 42%; Parents w children living at home: W 64.3%, M 64.5%; Mean no. of children: W 0.95 (0.89), M 1.10 (0.18) 9. Age: range 18-72, mean W 41.02 (1.03), M 39.35 (1.75) yrs | 1. NR 2. **BSRI-SF**   Self sex role identification; masculine, feminine, and gender neutral traits; score from self-report Likert scale questionnaire | 1. NR 2. Masc & fem had neg assoc w depr; Masc had neg assoc w trauma sx 3. Gender role endorsement assoc w psychosocial outcomes |
| 1. Kuntsche A, et al. (2019); *Drug Alcohol Depend* | 1. Switzerland; Community 2. Examine relationship b/w GRA, WFC & alcohol consumption 3. Research concerns GRA 4. Parents provided for self and child; French | 1. French-speaking Switzerland 2. 100% French speaking 3. 100% employed 4. 47% M 5. NR 6. NR 7. NR 8. NR 9. Age: mean M 40.5 ± 4.6, mean F 37.1 ± 4.5 | 1. NR 2. **ATWS**   Attitudes toward roles and rights of women in society; vocational, educational, and intellectual roles, freedom and independence, dating, courtship, and etiquette, drinking, swearing, and dirty jokes, sexual behavior, marital relations and obligations; score from self-report Likert scale questionnaire | 1. NR 2. Wo WFC, M & F parents w trad GRA had ↓ alcohol use than non-trad parents. W ↑ WFC, M & F parents w trad GRA had ↑ alcohol consumption compared to non-trad parents. 3. GRA have a moderating effect on relationship b/w WFC & alcohol use |
| 1. Lanksy et al, (2012); *American Heart Journal* | 1. USA; Connecticut; New Haven; California; Palo Alto; La Jolla; Tennessee; Nashville; North Carolina; Durham; Atlanta; Georgia; Minnesota; Minneapolis; hospital 2. Compare Dx accuracy of presenting sx, noninv test results, and GES in identifying obstructive CAD according to gender 3. Research concerns gender 4. Written by patients; NR | 1. NR 2. W: 88% white, 7% black, 6% other; M: 89% white, 5% black, 6% other 3. NR 4. 58% M 5. NR 6. NR 7. NR 8. NR 9. Age: W mean 60, M mean 69 | 1. **Gene expression score**   Algorithm dvlp from median expression values for 23 genes* obtained using Agencourt RNAdvance system RNA purification, PCR; venous blood sample from obstructive CAD patients w/o diabetes; 0- 40 pt scale from transformed scores  *Genes evaluated: Men  Neutrophil activation and apoptosis, innate immunity: IL18RAP, TNFAIP6, CASP5, IL8RB, TNFRSF10C, TLR4, KCNE3  Neutrophil activation-lymphocyte ratio, innate immunity and cell necrosis: S100A8, S100A12, CLEC4E, RPL28  NK activation T-cell ratio, innate immunity: SLAMF7, KLRC4, TMC8, CD3D  B-T cell ratio & adaptive immunity response: SPIB, CD79B, TMC8,CD3D  AF289562, TFCP2, HNRPF  TSPAN16, TFCP2, HNRPF  Genes evaluated: Women:  Neutrophil activation and apoptosis, innate immunity: IL18RAP, TNFAIP6, CASP5, IL8RB, TNFRSF10C, TLR4, KCNE3  Normalized neutrophil activation, innate immunity and cell necrosis: S100A8, S100A12, CLEC4E, NCF4, AQP9  SLAMF7, KLRC4, TMC8, CD3D  B-T cell ratio & adaptive immunity response: SPIB, CD79B, TMC8,CD3D  AF289562, TFCP2, HNRPF)   1. NR | 1. Sig pos assoc btwn ↑ GES and ↑ odds of obstructive CAD, sev and burden of CAD 2. NR 3. GES was independent predictor of obstructive CAD |
| 1. Lazzeri et al, (2016); *Urologic Oncology* | 1. Italy; Rozzano; Germany; Hamburg; UK; Stevenage; France; Creteil; Italy; Perugia; Spain; Barcelona; hospital 2. Evaluate sensitivity, specificity, and Dx accuracy of PHI in determining the presence of PCa at biopsy in comparison to tPSA, fPSA, and % of fPSA:tPSA 3. Research concerns sex 4. NR; NR | 1. NR 2. NR 3. NR 4. 100% M 5. NR 6. NR 7. NR 8. NR 9. Age: mean 67.3 (8.1) yrs | 1. **PHI**   Analysis of PSA immunoassay; blood sample from M >45 yrs w PSA >10 ng/ml w centrifugation of samples w/i 3 h of blood draw and storage at 21 or 4 °C for up to 48 h; (p2PSA/fPSA)√tPSA) = PHI   1. NR | 1. Total PSA and PHI values were sig ↑ and %fPSA values sig ↓ in patients with PCa, NS diff in fPSA 2. NR 3. supports Dx accuracy of PHI in patients with high (410 ng/ml) tPSA levels |
| 1. Leinonen JT, et al. (2023); *Commun med* | 1. UK, Finland; Community 2. Examine role of T in metabolic conditions & sex-specific Dx in both M & F 3. Research concerns sex-specific effects 4. Electronically signed by participants; NR | UK cohort; Finland cohort   1. NR; NR 2. 100% White British; NR 3. NR; NR 4. 57% M; NR 5. NR; NR 6. NR; NR 7. NR; NR 8. NR; NR 9. Age: range 37-73 yrs; range 24-37 yrs | 1. **TT**   UK cohort:  CLIA w competitive binding; NR; range 0.35 to 55.52 nmol/L  Finland cohort:  competitive radioimmunoassay; venous blood sample from antecubital vein after 12-h overnight fast in 24-39 yr olds; NR  **SHBG**  UK cohort:  CLIA w two-step sandwich; NR; analytical range 0.33 to (226–242) nmol/L  Finland cohort:  Spectria SHBG IRMA kit; venous blood sample from antecubital vein after 12-h overnight fast in 24-39 yr olds; NR  **GWAS analysis**  UK cohort:  BOLT-LMM; autosomal and X-chromosomal variants; p-value threshold < 5e-08  Finland cohort:  LDSC; autosomal variants; genetic correlation (rg)   1. NR | 1. In M, ↑ free TT has causal relationship w prostate cancer, ↓ osteoporosis; in F, ↑ free TT has causal relationship w hirsutism, PCOS, PMB, breast cancer, ↑ TT has causal relationship w hirsutism, PMB, breast cancer. In F, TT levels may have ↑ effect on disease risk, including PCOS. 2. NR 3. The relationship b/w TT levels & metabolic & endocrine traits is highly complex |
| 1. Levinsson et al. (2012);   *Sci Rep* | 1. UK; England; Scotland; Wales; community 2. Construct gender metric using available variables in the UK Biobank and apply it to the study of angina Dx 3. Research concerns gender metric 4. Broad written consent; NR | 1. England, Scotland, Wales 2. NR 3. 1% unemployed, 3% unable to work, 59% paid employment/self employed, 0.2% full/part time student, 0.4% unpaid/volunteer work, 2.5% taking care of home and family 4. 47% M 5. NR 6. 34% college/uni deg, 13% NVQ/HND/HNC, 16% none of above, 13% O lvls/GSCE, 4% CSE, 12% A lvls, 9% other 7. NR 8. NR 9. Age: mean M 56.9 (8.0) yrs, mean W 56.4 (7.9) yrs | 1. NR 2. **Femininity Score**   quantification of femininity through socio-cultural, economic variables; education level, work status, depression, risk-taking, neuroticism; self-report questionnaire | 1. NR 2. Fem traits may contribute to the Dx of angina differently in the two sexes; pos assoc between ↑ Femininity Score and angina Dx in men 3. Fem traits may involve healthier lifestyle/ greater health-seeking behav characteristics, leading to ↑ chances of angina Dx; sensitivity analyses showed a negative association between the FS and ever-smoking in overall sample |
| 1. Luckhoff et al. (2021); *Psy Research* | 1. South Africa; Capetown; community 2. Compare GR endorsement btwn first-episode SSD patients and controls 3. Research concerns GR 4. Obtained from participants/parents if <18 yrs; NR | 1. NR 2. 82% mixed ancestry, 13% Black, 5% Caucasian 3. NR 4. 73% M 5. NR 6. NR 7. NR 8. NR 9. Age: mean 24.6 | 1. NR 2. **BSRI**   Self sex role identification; masc, fem, and gender neutral traits; score from self-report Likert scale questionnaire | 1. NR 2. Masc scores were lower in both M and F patients compared to controls 3. Lower masc scores reported for chronic schizophrenia also affects first-episode patients with minimal prior treatment exposure irrespective of their biological sex |
| 1. Mansdotter et al, (2009); *J of Epi and Comm Health* | 1. Sweden; military 2. investigate assoc btwn masculinity rank during late adolescence and mortality patterns 3. research concerns gender 4. NR; NR | 1. NR 2. NR 3. NR 4. 100% M 5. NR 6. NR 7. NR 8. NR 9. NR | 1. NR 2. **MMPI**   how much a person identifies with stereotypical M and F gender roles; masculinity and femininity; self-report survey | 1. NR 2. Conscripts who ranked lowest on masculinity had a ↑ relative risk of mortality and suicide 3. Being ranked less masculine is assoc with ↑ mortality |
| 1. McHale S, et al. (1984);  *Monogr Soc Res Child Dev* | 1. USA; Pennsylvania; Community 2. Examine how parents’ sex-role orientation & employment assoc w involvement in child-oriented activities 3. Research concerns sex-role orientation 4. NR; chNR | 1. Central Pennsylvania 2. 100% White 3. NR 4. 50% M 5. NR 6. M mean years: 12.9 (1.7), F 12.1 (2.0) 7. NR 8. 100% married 9. Age: mean M 22.9±3.0 yrs, mean F 20.4±1.9 yrs | 1. NR 2. **ATWS – 15 item**   Attitudes toward roles and rights of women in society; vocational, educational, and intellectual roles, freedom and independence, dating, courtship, and etiquette, drinking, swearing, and dirty jokes, sexual behavior, marital relations and obligations; score from self-report Likert scale questionnaire  **PAQ**  Masculinity and femininity characteristics, instrumentality and expressivity, score from self-report scale questionnaire | 1. NR 2. M w non-trad GRA have ↑ involvement in home/childcare; Fem traits in M predict likelihood of involvement in home/childcare; NS assoc btwn masc/fem in F & home/childcare 3. No sig correlations b/w parents’ GI & behav |
| 1. McLaughlin K, et al. (2010);  *Nurs Educ Today* | 1. UK; University 2. Examine how gender & views of nursing in nursing students relate to course completion 3. Research concerns gender 4. NR;NR | 1. UK 2. NR 3. Nursing students 4. 9% M 5. NR 6. 88% completed nursing school, 12% not completed 7. NR 8. NR 9. Age: mean 20.7± 3.95 yrs | 1. NR 2. **BSRI**   Self sex role identification; masculine, feminine, and gender neutral traits; score from self-report Likert scale questionnaire  **Gendered Views of Nursing Careers Scale**  Nursing students’ perceptions of gender appropriateness of nursing careers; midwifery, school nurse, district nurse, health visitor, pediatrics, practice nurse, palliative care, oncology; self-report rating scale | 1. NR 2. Masc/fem was not predictive of nursing school completion 3. Students most likely to withdraw viewed nursing as appropriate for M & F |
| 1. Milner A, et al. (2018);   *Am J Mens Health* | 1. Australia; Victoria; Melbourne; Community 2. To examine whether poorer MH among M in M-dominated occupations is related to harmful GN 3. Research concerns gender norms 4. NR; NR | 1. Australia 2. NR 3. 72% permanently employed, 13% casual/fixed term, 15% self employed; occupational skill level: 40% high, 31% medium-high, 10% medium low, 19% low 4. 100% M 5. NR 6. 37% under 12 yrs, 63% over 12 yrs 7. 11 % ≥ $200,000; 13% ≥ $150,000–$199, 999; 12% ≥ $125,000–$149, 999; 16% ≥ $100,000–$124, 999; 15% ≥ $80,000–$99, 999; 14% ≥ $60,000–$79, 999; 7% ≥ $50,000–$59, 999; 12% ≥ $1–$49, 999 8. 18% never married, 0.3% wid, 4% div, 2% sep, 76% married/de facto 9. Age: range 18-55 yrs (9% 18-24; 24% 25-34; 33% 35-44; 33% 45-54; 2% 55) | 1. NR 2. **CMNI-22**   Masculine norm conformity; domains of winning, emotional control, risk-taking, violence, dominance, playboy, self-reliance, primacy of work, power over women, disdain for homosexuals, pursuit of status; score from self-report Likert scale questionnaire | 1. NR 2. Many CMNI-22 subscales were assoc w ↓ MH for M 3. M in M-dominated fields tend to adhere to specific gender norms |
| 1. Milner A, et al. (2019);   *Am J Mens Health* | 1. Australia; community 2. Examine whether masc and depressive sx explain three aspects of health literacy among men 3. Research concerns gender 4. Written consent; NR | 1. 59% Metro, 23% inner regional, 19% outer regional 2. Country of birth: 78% Australia, 22% other 3. 90% employed, 5% unemployed, 5% not in labor force 4. 100% M 5. NR 6. 37% under yr 12, 63% over yr 12 7. 22% >=$1,150/wk; 13% $960–$1,149/wk; 14% $770–$959/wk; 16% $580–$769/wk; 12% $380–$579/wk; 13% $190–$379/wk; 11% $1–$189; 0.4% none/negative 8. 75% married, 6% div/sep, 19% never married 9. Age: 9% 18-24 yrs, 21% 25-34 yrs, 32% 35-44 yrs, 38% 45-55 yrs | 1. NR 2. **CMNI-22**   Masculine norm conformity; domains of winning, emotional control, risk-taking, violence, dominance, playboy, self-reliance, primacy of work, power over women, disdain for homosexuals, pursuit of status; score from self-report Likert scale questionnaire | 1. NR 2. ↑conformity to masc norms assoc with ↓ health literacy; mod-sev depressive sx assoc with ↓ health literacy on all three scales, with effects particularly strong for “Ability to engage with healthcare providers” 3. Conformity to masc norms and depressive sx may be predictors of health literacy among men |
| 1. Nguefack H, et al. (2022); *Frontier Pain Res* | 1. Canada; Quebec; Montreal; Community 2. Explore the assoc b/w GI & GR & their interactions w MAE in participants w CP 3. Research concerns GI and GR 4. NR; NR | 1. Quebec, Canada 2. Country of birth: 96% Canada, 4% other 3. 35% worker, 65% unemployed 4. 15% M 5. NR 6. 79% postsecondary, 21% no post secondary 7. NR 8. NR 9. Age: mean 50.06±13.14 yrs | 1. NR 2. **BSRI – 18 item French version**   Self sex role identification; masculine, feminine, and gender neutral traits; score from self-report Likert scale questionnaire | 1. NR 2. Women reported ↑ severe MAE than men among those classified as masculine and androgynous 3. GI and GR assoc w number of pain MAE reported as severe, and they interacted with each other |
| 1. Nowotny et al (2015); *J of Health and Soc Behav* | 1. USA; community 2. Dvlp state-level measure of gendered context to examine influence of gender normative attitudes and behaviors on rates of SI in youth 3. Research concerns gender 4. NR; NR | 1. NR 2. 65% white, 15% black, 12% Hispanic, 4% Asian, 4% other 3. NR 4. 51% M 5. NR 6. Grades 7-12 7. NR 8. NR 9. Age: mean 16.6 yrs | 1. NR 2. **SBAS**   probability that an adolescent is M or F; M and F traits; self-report Likert scale questionnaire | 1. NR 2. ↑ rigidity of normative gender behaviors and attitudes assoc w ↑ suicidal ideation rate, stronger for F 3. women living in highly gendered contexts are vulnerable to fatalistic suicide |
| 1. Occhipinti et al, (2019);  *Am J Mens Health* | 1. Australia; community 2. Assess validity of MCD-I in men with other chronic diseases to explore potential for wider application 3. Research concerns gender 4. Written consent; NR | 1. NR 2. 86% Caucasian, 0.5% Asian, 0.5% European, 0.2% Aboriginal, 0.3% Anglo-Indian, 1% missing 3. 37% employed full time/self employed, 8% part time/casual, 1% full time home duties/career, 0.5% unemployed, 51% retired, 1% student/volunteering, 0.6% permanently unable to work 1% other, 0.5% missing 4. 100% M 5. NR 6. 2% no formal schooling, 24% primary school, 11% HS, 43% trade/technical diploma, 14% uni deg, 4% other, 2% missing 7. 10% <$20,000; 24% $20,000–less than $40,000; 16% $40,000–less than $60,000; 12% $60,000–less than $80,000; 26% > $80,000; 4% don’t know 8. 80% married/defacto, 9% div/sep, 4% wid, 4% never married, 3% missing 9. Age: range 47-93yrs, mean 67.35 (10.05) yrs   Sexual orientation: 81% heterosexual, 0.8% homosexual, 1% bisexual, 2% rather not say, 9% missing | 1. NR 2. **MCD-I**   masculinity for men with chronic disease; optimistic capacity, sexual importance/priority, family responsibilities, emotional self-reliance, strength/fitness; self-report Likert scale questionnaire | 1. NR 2. MCD-I is a valid measure of internalized masculine beliefs for men with chronic disease that appears sensitive to age and to sexual health 3. tailoring of health services for men can be guided by MCD-I outcomes to ensure gender-sensitized men’s health interventions |
| 1. Paggi et al (2017); *Suicidology Online* | 1. USA; New York City; senior centres 2. Dvlpment, reliability and validity of a proxy measure of TM for use in case-control research of suicide 3. Research concerns gender 4. NR; NR | 1. NR 2. 29% Latino, 9% Black, 5% Asian/Pacific Islander, 3% other, 39% white 3. NR 4. 35% M 5. NR 6. NR 7. MR 8. NR 9. Age: mean 72.2 (7.1); range >60 | 1. NR 2. **MRNI**   Endorsement of TM ideology; avoidance of femininity, negativity toward sexual minorities, self-reliance through mechanical skills, toughness, dominance, importance of sex, restrictive emotionality; self-report Likert scale questionnaire  **FIS**  Endorsement of trad fem ideology; stereotypic images and activities, dependency, purity, caretaking, emotionality; self-report Likert scale questionnaire | 1. NR 2. mean MRNI-P did not differ from self-rated MRNI; self-rated MRNI had NS trend level assoc with suicidal ideation 3. The MRNI-P is a key methodological tool for testing the relationship of TM to suicide death |
| 1. Po Yee Lo I, et al. (2019); *Arch Sex Behav* | 1. China; Hong Kong; Community 2. Examine effects of different types of GR on depr 3. Research concerns GR 4. Online consent form; Chinese | 1. Hong Kong, China 2. 100% ethnically Chinese 3. 54% employed full time, 36% full time students, 2% employed part time, 3% unemployed, 2% other 4. 0% M 5. 73% no affiliation, 13% Protestant, 7% Catholic, 4% Buddhist, 3% other 6. 82% in/completed uni, 18% HS diploma 7. NR 8. 55% in SS relationship, 39% single, 5% engaged to SS partner, 1% married to SS partner 9. a. Age: range 18–35, mean 24.67±4.6 yrs; 10. Sexual orientation: 100% Lesbian | 1. NR 2. **BSRI - Chinese**   Self sex role identification; masculine, feminine, and gender neutral traits; score from self-report Likert scale questionnaire | 1. NR 2. Adg participants had ↑ severe adverse effects; F had sig ↑ severe adverse effects compared to M 3. GI, GR differences were assoc w number of severe adverse effects |
| 1. Rhead, R., et al, (2018); *Epi and Social* | 1. Zimbabwe; Manicaland; Community 2. Identify the sociodem determ of masc social norms, measure assoc w sexual risk behaviour and use of HIV prevention, testing and treatment services 3. Research concerns GN 4. Informed consent, freedom to withdraw; NR | 1. 24% town, 21% agricultural estate, 28% roadside settlement, 27% subsistence farming area 2. NR 3. NR 4. 100% M 5. 18% no religion, 46% Christian church, 23% spiritual church, 13% other church 6. 17% primary or less, 83% secondary or higher 7. 11% 1st quartile (poorest), 42% 2nd quartile, 32% 3rd quartile, 16% 4th quartile 8. 47% no community grp membership, 28% one grp, 25% >1 grp; 45% single, 50% married, 4% sep/div, 1% wid 9. Age: 43% 15-24 yrs, 25% 25-34 yrs, 19% 35-44 yrs, 12% 45-54 yrs | 1. NR 2. **Masculine Measure**   individual-level determinants of masculine norms; toughness, antifemininity, sex drive, social status; self-report questionnaire | 1. NR 2. In HIV-neg men, more ↑ scorers for antifemininity took steps to avoid infection; fewer ↑ scorers on soc status reported recent HIV test; in HIV-pos men, more ↑ scorers on sex drive had been diagnosed, were on antiretroviral treatment, and were in AIDS groups 3. HIV treatment, prevention programs must consider the multidimensionality of masc norms. Scale dvlped in this can be used by other surveys to examine masc social norms |
| 1. Schopp C, et al. (2006);  *Brain Injury* | 1. Australia; Victoria; Abbotsford; Hospital 2. Examine link b/w masc role & psychosocial, rehab outcomes in M w TBI 3. Research concerns GR 4. Consented in prior study; NR | 1. NR 2. NR 3. 65% employed 4. 100% M 5. NR 6. 35% HS, 32% < HS, 33% > HS 7. NR 8. NR 9. Age: range 18–91, mean 41.1±19.2 yrs | 1. NR 2. **CMNI**   Masculine norm conformity; domains of winning, emotional control, risk-taking, violence, dominance, playboy, self-reliance, primacy of work, power over women, disdain for homosexuals, pursuit of status; score from self-report Likert scale questionnaire  **GRCS-I**  Men’s gender role conflict; Success, power, competition, restrictive emotionality, restrictive affectionate behavior between men, conflicts between work and family relations; score from self-report Likert scale questionnaire | 1. NR 2. Masc norms (Winning, Pursuit of Status) had pos assoc w functional indep; life satisfaction linked w Power Over Women, Playboy traits; No sig effects b/w GRCS, life satisfaction, functional gains 3. Specific masc traits assoc w functional, psychological outcomes for M w TBI |
| 1. Short S, et al. (2023);  *Midwifery* | 1. UK; Community 2. Explore link btwn masc & depr in fathers in PP period 3. Research concerns GN 4. Completed electronically; English | 1. UK 2. 93% Caucasian, 5% Asian & Mixed Asian, 2% Black 3. 100% employed, 87% took parental leave, 13% did not 4. 100% M 5. NR 6. NR 7. NR 8. 100% partnered, 59% 1st time fathers, 41% 2nd time 9. a. Age: 1st-time fathers mean 33.71±6.01 yrs; 2nd-time fathers mean 35.56±4.64 yrs   b. Sexual orientation: 98% heterosexual, 2% bisexual or homosexual | 1. NR 2. **CMNI**   Masculine norm conformity; domains of winning, emotional control, risk-taking, violence, dominance, playboy, self-reliance, primacy of work, power over women, disdain for homosexuals, pursuit of status; score from self-report Likert scale questionnaire | 1. NR 2. Post-natal depr had pos correlation w Self-Reliance & Primacy of Work 3. Conformity to masc norms (Self-Reliance, Primacy of Work) was related to PP depr |
| 1. Snyder PJ, et al. (2016); *New Eng J Med* | 1. USA; Pennsylvania; Philadelphia; Hospital 2. Determine the impact of T tx in men w low T levels 3. Research concerns sex 4. NR; NR | 1. NR 2. NR 3. NR 4. 100% M 5. NR 6. NR 7. NR 8. NR 9. Age: ≥65yrs | 1. **TT**   LCMS/MS; serum samples from M ≥ 65 yrs stored at -80°C ; 1-1000 ng/dl  **cFT**  equilibrium dialysis; serum samples from M ≥ 65 yrs stored at -80°C ; product of TT measured using LC-MS/MS and % FT determined using equilibrium dialysis, reference range in healthy M 21-50 yrs = 58-294 pg/ml   1. NR | 1. Tx group had ↑ PDQ scores & ↓ in depr sx compared to placebo 2. NR 3. ↑ of T levels in men ≥65yrs to the low-normal range for men 19-40yrs had sig effects on sexual function, mood |
| 1. Sullivan et al, (2014); *British J of Health Psychol* | 1. UK; community 2. Determine whether adherence to masc norms is assoc with men's attitudes towards seeking professional psychological help 3. Research concerns gender 4. Consent form; NR | 1. 49% London and southeast England, 4% Scotland, 3% Wales, 1% Northern Ireland 2. 95% white, 2% mixed ethnicity, 2% Asian, 2% black 3. 78% employed, 22% unemployed 4. 100% M 5. 27% Christian, 2% Buddhist, 2% Jewish, 1% Hindu, 1% Muslim, 64% not religious 6. 2% no formal qualifications, 33% secondary school, 32% uni deg, 10% prof degree, 23% grad school 7. 25% £0–15,000, 18% £15,001–25,000, 26% £25,001–35,000, 12% £35,001–45,000, 10% £45,001–60,000, 3% £60,001–80,000, 6% £80,001+ 8. 43% single, 3% div, 1% sep, 34% married/civil partnership, 19% cohabiting 9. Age: 17% 18-25, 49% 26-35, 21% 36-45, 9% 46-55, 4% 56-65, 1% >65   Sexuality: 86% heterosexual, 14% gay | 1. NR 2. **MRAS**   endorsement of traditional masculine ideology; status, toughness, anti-femininity, and sex; score from self-report Likert scale questionnaire  **NMAS**  normative male alexithymia; experience of emotions; self-report Likert scale questionnaire | 1. NR 2. Trad masc ideology, normative alexithymia had neg corr w help seeking 3. a greater fear of intimacy is linked to dvlpment of difficulties characterized by alexithymia, which may be assoc w less pos attitudes towards help seeking |
| 1. Sutter et al, (2019); *Arch Gynecol Obstet* | 1. Switzerland; Bern; Hospital 2. assess the impact of serum androgen levels and androgen receptor CAG polymorph on sex func in women 3. research concerns sex 4. Written from participants; NR | 1. 100% Caucasian, German speaking 2. NR 3. NR 4. 0% M 5. 2% no deg, 78% vocational school, 20% university/technical college deg 6. Monthly gross income: 49% 5000–10,000 Swiss Francs, 7% > 10,000 Swiss Francs 7. 100% partnered, 60% married 8. Age: mean 52.8 ± 5.1 years | 1. **TT**   NR; Serum from fasting blood samples taken 8-10 am, menstrual cycle day 1–5 in premenstrual women; 0.3–3.8 nmol/l, postmenopausal 0.4–4.5 nmol/l  **DHEAS levels**  NR; Serum from fasting blood samples taken 8-10 am, menstrual cycle day 1–5 in premenstrual women; 1.5–7.7 µmol/l  **FAI**  Calc from TT, SHBG; TT, SHBG obtained from fasting blood samples taken 8-10 am, menstrual cycle day 1–5 in premenstrual women; FAI=TT × 100/SHBG  **AR polymorphism**  DNA isolation, PCR; fasting EDTA blood samples taken 8-10 am, menstrual cycle day 1–5 if premenstrual from Caucasian women in heterosexual relationships; number of CAG repeats calc by comparing detected PCR fragment to sequencing reactions run in parallel and serve as molecular size marker   1. NR | 1. No assoc btwn androgen serum lvl and sex func, NS assoc btwn sex func and AR CAG repeat polymorph. 2. NR 3. Sig pos corr btwn ↑ CAG repeats and ↑ freq, sever of pain during/after intercourse |
| 1. Tabler., J, et al. (2021); *SSM Mental Health* | 1. USA; North Carolina; Chapel Hill; Community 2. Examine how self-perceived GE and everyday discrimination contributes to gender disparities in MH 3. Research concerns gender 4. NR; NR | 1. NR 2. 85% non-Hispanic White, 10% Hispanic, 15% non-Hispanic Black 3. NR 4. 50% M 5. NR 6. 50th percentile: some college 7. 50th percentile: $50-75k annually 8. Social support on a scale from 0-30: mean 22.13 (4.65) 9. Age: mean 37 (1.9) yrs   Sexual orientation: 85% heterosexual, 10% mostly heterosexual, 2% bisexual, 3% gay/mostly gay, 0.4% asexual or other | 1. NR 2. **Self-Perceived gender expression (W5)**   current socially assigned gender expression; appearance and mannerisms, self-report Liker scale questionnaire | 1. NR 2. ↑ perceived GE nonconformity assoc w depressive sx for M and W; ↑ discrimination is assoc w ↑ depressive sx and ↑ odds of suicidality. 3. Mediation analyses suggest that discrimination works directly and indirectly through self-perceived GE to shape MH outcomes |
| 1. Thomas et al, (2024); *Biol Psychiatry Glob Open Sci* | 1. USA; Community 2. Tested for associations of 16 PGSs with quantitative measures of GD and mental health. 3. Research concerns gender 4. NR; NR | Study 1; Study 2   1. NR; NR 2. Genetic pop: 0% Africa, 4% Americas, 1% East Asia, 92% Europe, 4% South Asia; 0% Africa, 2% Americas, 0% East Asia, 96% Europe, 2% South Asia 3. NR; NR 4. 22% M, 61% cis, 30% TGNB, 9% no label; 61% M, 94% cis, 6% TGNB 5. NR 6. NR 7. NR 8. NR 9. Age: 37; 25 | 1. **PGS**   calculated using LDpred2 and the bigsnpr tools in R; genotype arrays from SPARK (US autism study) iWES1 2022 release WGS releases 2, 3, and 4; calculated from the following GWASs: ADHD, anorexia nervosa, autism, BPD, major depression, OCD, schizophrenia, cognitive performance, educational attainment, and NHSB. The public LDpred2 beta weights from the Polygenic Index Repository were used to calculate PGSs for extraversion, neuroticism, openness, risky behavior, number of children ever born (men), and number of children ever born (women)   1. **GSR**   An individual’s gender across key elements of experience; how a person thinks of themselves, how they want to be seen, how they want to be addressed, how they want to be, physically, how they want to dress/express themselves, interests; self-report questionnaire score | 1. NR 2. GSR scores had NS assoc with any neuropsychiatric PGS; GSR nonbinary had pos assoc w cognitive performance PGS; GSR binary had pos assoc with nonheterosexual sexual behav PGS 3. Many people who were cis also showed evidence of GD, although not enough to report TGNB identities. This underscores the value of the GSR for capturing dimensional GD beyond self-endorsed ident alone |
| 1. Vader et al, (2023); *Prevent Med Rep* | 1. Netherlands; Doetinchem; Community 2. Explore how masculinity may affect sex differences in the prevalence of CHP 3. Research concerns gender 4. Written informed consent; NR | 1. Doetinchem, Netherlands (rural mid-sized town) 2. NR 3. NR 4. 47% M 5. NR 6. M: 9% lower ed lvl than partner, 55% same lvl/no partner, 35% higher lvl than partner; W: 24% lower, 53% same, 23% higher 7. M: 39% low SES, 33% medium, 28% high; W: 52% low, 27% medium, 21% high 8. Avg hrs spent on chores: M – 13% >= 10 h, 21% 5-10 h, 66% <5h; W – 64% >= 10 h, 24% 5-10 h, 13% <5 h; 9. Age: mean M = 60.5 ± 9.5 yrs, W = 59.4 ± 9.7 yrs | 1. NR 2. **MGS**   Assessing masculinity; work & education, informal care, lifestyle, emotions; score from self-report survey | 1. NR 2. ↑ scores on MGS assoc with ↓ prevalence of CHP for both M and W; role of masc gender on sex differences in CHP depends on whether CHP are more often found among M or W 3. Gender might operate as a mediator of sex diff in chronic health |
| 1. Vafaei A, et al. (2016);  *PLOS One* | 1. Canada; Ontario, Kingston; Quebec, Montreal; Brazil, Natal; Albania, Tirana; Manizales, Colombia; Community 2. Assess assoc between GR & depr in older adults 3. Research concerns GR 4. Written informed consent; English, French, Albanian, Spanish, Portuguese | 1. NR 2. NR 3. NR 4. 48% M 5. NR 6. 37% < secondary, 25% secondary, 40% > secondary 7. 33% very sufficient income, 39% barely sufficient, 36% insufficient 8. 65% married, 17% wid, 13% div, 6% single 9. Age: range 65–74, mean M 69.1.1±2.9 yrs, mean F 69.1±2.8 yrs | 1. NR 2. **BSRI – 12 item**   Self sex role identification; masculine, feminine, and gender neutral traits; score from self-report Likert scale questionnaire | 1. NR 2. M & F w masc traits had ↑ rates of depr; M & F w adg traits had ↓ rates of depr 3. Adg older adults reported the fewest depr Sx |
| 1. Wacker et al, (2021); *J of Occ Med and Tox* | 1. Germany; Med service company 2. fem and masc used to describe indiv and work env characteristics and analyze effects 3. research concerns gender 4. voluntary, no agreements or payments w participants; NR | 1. NR 2. NR 3. 93% perm contract in company, 2% fixed-term, 2% max wage contract, <1% probation,1% student assist; 6% had side income 4. 0% M 5. NR 6. NR 7. NR 8. 50% single, 36% married, 5% sep, 9% div 9. Age: range 22-66 yrs, mean = 40.48, SD = 10.38 yrs | 1. NR 2. **GTS+ Scale**   General feminine ideology in adult women; body image, care-taking, sexuality, family, religion, marriage, passivity, dependency, and career; self-report questionnaire score | 1. NR 2. P-E fit in fem had sig pos effect on burnout; P-E fit in masc had sig pos effect on hair cortisol 3. Would possibly be more reasonable to raise F characteristics in company and team culture then to change masc characteristics to prevent burnout in women. |
| 1. Walcott et al, (2015); *Am J Mens Health* | 1. Jamaica; Hospital 2. Determine assoc btwn masc and inequitable GN and men FP behaviors 3. Research concerns GN 4. Obtained from participants; NR | 1. Western Jamaica 2. NR 3. 64% employed 4. 100% M 5. 79% any religious affiliation 6. 79% secondary or higher 7. 63% < JA $30,000 8. 65% single/not living together 9. Age: mean 32.4 ± 10.1 yrs | 1. NR 2. **GEM Scale**   Gender equity; men’s support for inequitable and equitable gender norms; score from self-report Likert scale questionnaire  **Macho Scale**  Masc identity and gender relations in the Caribbean; dominance, virility including homophobia, aggression, restrictive emotionality, and need to have children; score from self-report Likert scale questionnaire | 1. NR 2. M w ↑ support for ineq GN less likely to take steps to prevent unplanned preg. M w ↑ support for masc norms more likely to report fathering children w multiple W and desired to have large family (>3 children). 3. Masc and ineq GN have important implications for family planning programs targeting M in Jamaica; importance of measuring GN to inform design of gender transformative interventions in FP programs |
| 1. Yang X, et al. (2018);  *J Affective Disorders* | 1. China; Hong Kong; Shenzhen 2. Examine link b/w masc role discrepancy & MH 3. Research concerns GR 4. Verbal informed consent (telephone); Chinese (Mandarin or Cantonese) | 1. Hong Kong 2. 100% Chinese, Chinese speaking 3. NR 4. 100% M 5. NR 6. 60% secondary or above, 40% college or above 7. NR 8. 69% married/cohabiting, 29% single, 2% div/sep/wid 9. Age: 18-35 range 25%, 35-50 range 27%, 51-60 range 48% | 1. NR 2. **MGRDSS - Chinese**   Gender role discrepancy stress, gender role discrepancy and discrepancy stress, mean score from self-report Likert scales | 1. NR 2. MRD had pos assoc w depr & social anx 3. MRD had sig impact on depr |
| 1. Zeldow PB, et al. (1987); *J Pers Assess* | 1. USA; Illinois; Chicago; Northwestern University Med School 2. Examine relationship btwn masc & fem with adjustment, interpersonal functioning in med school 3. Research concerns gender diff 4. NR; NR | 1. Chicago 2. NR 3. 100% med students 4. 68% M 5. NR 6. 100% first year med students 7. NR 8. NR 9. Age: mean 25.4 | 1. NR 2. **PAQ**   Masc and fem characteristics, instrumentality and expressivity, score from self-report scale questionnaire | 1. NR 2. Masc and fem had NS assoc w depr 3. Adg had ↑ risk of depr sx |

*Abbreviations:* **Adg,** androgynous; **anx,** anxiety; **AR,** androgen receptor; **assoc,** association; **ATWS,** Attitudes Towards Women Scale; **avg,** average; **behav**, behavior; **BSRI**, Bem Sex Role Inventory; **btwn**, between; **CAD,** coronary artery disease; **calc**, calculated; **CFNI,** Conformity to Feminine Norms Inventory; **CHD**, coronary heart disease; **CHP**, chronic health problems; **cis,** cisgender; **CLIA,** chemiluminescence immunoassay; **CMNI,** Conformity to Masculine Norms Inventory; **CMT,** cancer-related masculine threat; **corr,** correlation; **CP**, chronic pain; **CVH**, cardiovascular health; **deg,** degree; **depr,** depression; **determ,** determinants; **DHEAS**, dehydroepiandrosterone sulfate; **Dx**, diagnosis; **diff**, differences; **div,** divorced; **DM,** drive for muscularity; **dvlp,** develop; **dysreg**, dysregulation; **EAC**, emotional approach coping; **ED,** eating disorder; **env,** environment; **F**, female; **FAI,** free androgen index**; fem,** feminine**/**femininity; **FIS**, Feminine Ideology Scale; **FP,** family planning**; fPSA,** free prostate serum androgen; **func,** function; **GCS,** Gender Climate Scale; **GD,** gender diversity**; GE,** gender expression; **GEM,** Gender Equitable Men**; GI,** gender identity; **GN,** gender norms; **GR**, gender roles; **GRA**, gender role attitudes; **GRCS,** Gender Role Conflict Scale; **GRO**, gender role orientation; **GSR,** Gender Self Report; **GWAS,** Genome Wide Association Study; **HS**, high school; **indiv**, individual; **ineq,** inequitable; **IR**, insulin resistance; **iwes1,** integrated whole-exome sequencing; **lvl,** level; **M**, male; **MAE,** medication adverse effects; **masc,** masculinity/masculine; **MCD-I,** Masculinity in Chronic Disease Inventory; **MD**, muscle dysmorphia; **med**, medical; **MGRDSS,** Masculine Gender Role Discrepancy Stress Scale; **MGS,** Masculine Gender Score; **MH,** mental health; **MI**, myocardial infarction; **MMPI,** Minnesota Multiphase Personality Index; **mod,** moderate; **mos**, months; **MRAS,** Masculine Role Attitudes Scale; **MRNI**, Male Role Norms Inventory; **neg,** negative; **NMAS**, Normative Male Alexithymia Scale; **noninv,** non-invasive; **NR**, not reported; **NS,** non significant; **PAQ**, Personal Attitudes Questionnaire; **PCa,** prostate cancer; **PCOS,** Polycystic Ovary Syndrome; **PGS,** polygenic score; **PHI**, Prostate Health Index; **pop,** population; **pos**, positive; **PP,** post partum; **preg,** pregnancy; **PSA,** prostate specific antigen; **PT,** pubertal timing; **pt,** point; **qual,** quality; **SBAS**, Sex-Typed Behaviors and Attitudes Score; **sep,** separated; **sev,** severe; **SHGB**, sexual hormone-binding globulin ; **SI**, suicidal ideation; **sig**, significant; **soc, social; sociodem,** sociodemographic; **SSD**, schizophrenia spectrum disorders ;**sx,** symptoms; **TGNB,** transgender nonbinary; **trad,** traditional; **trans,** transgender; **TT,** total testosterone; **tPSA,** total prostate serum androgen; **uni,** university; **w,** with; **WFC**, work-family conflict**; WGS,** whole-genome sequencing; **w/i**, within; **wid,** widowed; **wk**, week; **yrs,** years;

Symbols: ↓, decreased/lower; ↑, increased/higher
