# Supplementary material for: Systematic review of instruments for measuring sex and gender attributes: Assessment of measurement properties and utility in research on clinical and functional outcomes
Source: Research Square preprint supplement (doi:10.21203/rs.3.rs-7754711/v1), 2025-10-15
Supplement: Supplementary file 8 [file 95370615edbc7032b87eee54.docx]

Quality score evaluation rubric for gender measures

| Criteria | 0 | 1 | 2 |
| --- | --- | --- | --- |
| Independent use by different teams | 0 peer-reviewed studies by independent research teams (developed in = used in) | 1 peer-reviewed study by independent research teams | ≥2 peer-reviewed studies by independent research teams |
| Sufficient information for appraisal/replication (items, scoring, admin details, access, language/translation notes) | Insufficient details (not open access) | Partial details (e.g., scoring but not items) | Full details (items/scales available or clearly referenced; scoring; administration; permissions) |
| Validity & reliability in relevant populations and with clinical/functional outcomes | No validity/reliability reported | Partial (some psychometrics, limited outcome linkage or population mismatch) | Evidence of reliability (e.g., α≥0.70, test–retest ICC≥0.70) and validity (construct/criterion) and links to clinical/functional outcomes in the population of use |
| Total score | 0–2 = Low | 3–4 = Moderate | 5–6 = High |
