# Supplementary material for: Systematic review of instruments for measuring sex and gender attributes: Assessment of measurement properties and utility in research on clinical and functional outcomes
Source: Research Square preprint supplement (doi:10.21203/rs.3.rs-7754711/v1), 2025-10-15
Supplement: Supplementary file 9 [file 953cc0652d8d8a13692c1c14.docx]

**Database Search Methods**

The database search strategy was conducted in collaboration with a hospital Information Specialist. The search was conducted in the following databases: Medline ALL (Ovid), Embase (Ovid), APA PsycInfo (Ovid), CINAHL Ultimate (EBSCOhost), and Web of Science.

Search queries were composed of appropriate subject headings and text words for the following search concepts: gender, sexuality, and instruments (psychometric properties). Given the ubiquitous nature of these search terms in contexts beyond the review scope, the following strategies were used to improve precision:

- Gender and sexuality text words were combined with instrument terms using an adjacency operator instead of Boolean AND
- Gender and sexuality text words were combined with the truncated term “measur” using an adjacency operator. Standard sensitivity (i.e. within 3 words) was used for the abstract and author-supplied keyword fields (where available), while greater sensitivity was allowed for the title field (i.e. within 5 words)
- Instrument subject headings were combined with psychometric properties subject headings and text words using Boolean AND
- Instrument text words were combined with psychometric properties text words using an adjacency operator
- Ovid’s *Focus* function was applied to certain Emtree subject headings that were considered important to include but relatively broad in scope. The *Focus* function limits to results for which the subject heading is a major concept.
- In Ovid databases, results were limited to those containing:
  - Any gender or sexuality subject headings, OR
  - Any gender or sexuality text words in the title or author-supplied keywords, OR
  - Any *two* gender or sexuality text words in the abstract (using Ovid’s frequency operator)

A search filter was applied to each database search to exclude pediatric studies. Search filters developed by the Canadian Agency for Drugs and Technologies in Health (CADTH) were also used to limit to observational studies. Filters for Medline, Embase, PsycInfo, and CINAHL (1,2,3,4) were modified to remove terms for case reports. The Medline filter was adapted for Web of Science. No date or language restrictions were imposed on the search.

All databases were searched from inception to November 20th, 2023. Bibliographic duplicates were removed by the information specialist using EndNote 20 and an adapted Bramer Method (5).

**Database results from November 20, 2023 = 19,538**

Medline = 3869

Embase = 5755

PsycInfo = 2772

CINAHL = 4625

Web of Science = 2517

Duplicates removed = 6432

Records screened = 13,106

**References**

1. Observational Studies - MEDLINE. In: CADTH Search Filters Database. Ottawa: CADTH; 2023: https://searchfilters.cadth.ca/link/38. Accessed 2023-11-16.
2. Observational Studies - Embase. In: CADTH Search Filters Database. Ottawa: CADTH; 2023: https://searchfilters.cadth.ca/link/37. Accessed 2023-11-16.
3. Observational Studies - PsycInfo. In: CADTH Search Filters Database. Ottawa: CADTH; 2023: https://searchfilters.cadth.ca/link/39. Accessed 2023-11-16.
4. Observational Studies - CINAHL. In: CADTH Search Filters Database. Ottawa: CADTH; 2023: https://searchfilters.cadth.ca/link/88. Accessed 2023-11-16.
5. Bramer, W. M., Giustini, D., de Jonge, G. B., Holland, L., & Bekhuis, T. (2016). De-duplication of database search results for systematic reviews in EndNote. Journal of the Medical Library Association : JMLA, 104(3), 240–243. https://doi.org/10.3163/1536-5050.104.3.014

**PRISMA-S Checklist**

| **Section/topic** | **#** | **Checklist item** | **Location(s) Reported** |
| --- | --- | --- | --- |
| **INFORMATION SOURCES AND METHODS** | | | |
| Database name | 1 | Name each individual database searched, stating the platform for each. | Y |
| Multi-database searching | 2 | If databases were searched simultaneously on a single platform, state the name of the platform, listing all of the databases searched. | N/A |
| Study registries | 3 | List any study registries searched. | N/A |
| Online resources and browsing | 4 | Describe any online or print source purposefully searched or browsed (e.g., tables of contents, print conference proceedings, web sites), and how this was done. | N/A |
| Citation searching | 5 | Indicate whether cited references or citing references were examined, and describe any methods used for locating cited/citing references (e.g., browsing reference lists, using a citation index, setting up email alerts for references citing included studies). | N/A |
| Contacts | 6 | Indicate whether additional studies or data were sought by contacting authors, experts, manufacturers, or others. | N/A |
| Other methods | 7 | Describe any additional information sources or search methods used. | N/A |
| **SEARCH STRATEGIES** | | | |
| Full search strategies | 8 | Include the search strategies for each database and information source, copied and pasted exactly as run. | Y |
| Limits and restrictions | 9 | Specify that no limits were used, or describe any limits or restrictions applied to a search (e.g., date or time period, language, study design) and provide justification for their use. | Y |
| Search filters | 10 | Indicate whether published search filters were used (as originally designed or modified), and if so, cite the filter(s) used. | Y |
| Prior work | 11 | Indicate when search strategies from other literature reviews were adapted or reused for a substantive part or all of the search, citing the previous review(s). | N/A |
| Updates | 12 | Report the methods used to update the search(es) (e.g., rerunning searches, email alerts). | N/A |
| Dates of searches | 13 | For each search strategy, provide the date when the last search occurred. | Y |
| **PEER REVIEW** | | | |
| Peer review | 14 | Describe any search peer review process. | N/A |
| **MANAGING RECORDS** | | | |
| Total Records | 15 | Document the total number of records identified from each database and other information sources. | Y |
| Deduplication | 16 | Describe the processes and any software used to deduplicate records from multiple database searches and other information sources. | Y |
|  |  |  |  |
| PRISMA-S: An Extension to the PRISMA Statement for Reporting Literature Searches in Systematic Reviews | | |  |
| Rethlefsen ML, Kirtley S, Waffenschmidt S, Ayala AP, Moher D, Page MJ, Koffel JB, PRISMA-S Group. | | |  |
| Last updated February 27, 2020. | |  |  |
