# Supplementary material for: Systematic review of instruments for measuring sex and gender attributes: Assessment of measurement properties and utility in research on clinical and functional outcomes
Source: Research Square preprint supplement (doi:10.21203/rs.3.rs-7754711/v1), 2025-10-15
Supplement: Supplementary file 10 [file b6f54ada2f48a766690fbe98.docx]

**Table 3.b** Sex measure characteristics, including development sample and samples used in

| Measure; country of development/countries of use | Frequency of use by diff team of investigators (after development)/ frequency of use by same team of investigators | Cost/no cost, details for critical evaluation/replication | 1. Sensitivity (true-positive rate; clinical descriptive target: ≥ 90% is typically expected for a predictive or predictive assay, ≥ 95% is ideal if the assay is used to rule out high-risk disease (to minimize false negatives); 2. Specificity (true-negative rate; for clinical tests ≥ 80–90% is acceptable; for screening, slightly lower specificity may be tolerated if sensitivity is very high); 3. Reproducibility (precision; intra-measure coefficient of variation target ≤ 10%, inter-measure coefficient of variation (different days) target ≤ 15%) 4. Measurement error 5. Researchers’ notes | Quality score |
| --- | --- | --- | --- | --- |
| 1. Gene Expression Score 2. NR/ USA [1] 3. Identify obstructive coronary artery disease (CAD) according to sex [2] | 3/0 | Cost: $1245 (in US) [3] | 1. 85% at score threshold of 14.75 (disease likelihood 20%); neg predictive value = 83%/ non diabetic obs CAD patients [2] 2. 43% at score threshold of 14.75 (disease likelihood 20%); pos predictive value = 46%/ non diabetic obs CAD patients [2] 3. CV MSE = 0.00613 (SD 0.00051) [4] 4. Interpretation challenges due to circadian, lifestyle, and medication influence [5,6] 5. Expression patterns vary with developmental stage, puberty, aging, and immune status [5,6] | 2+ 2 + 1 = 5 |
| 1. Prostate Health Index (PHI) 2. Europe [7]/ Europe [8] 3. identify clinically significant prostate cancer and aid in distinguishing from benign prostatic conditions [7] | 1/0 | Cost: $72-130 [9] | 1. PHI 24 or greater = 91.8% (validation sample)/ biopsy naïve males [10] 2. PHI 24 or greater = 30% (validation sample)/ biopsy naïve males [10] 3. NR 4. Hormonal therapy can significantly impact PSA levels; PSA has a diurnal rhythm [11] 5. Blood tests need to be collected in the morning, most relevant for males >50; PSA and PHI levels increase with age due to BPH [7] | 1 + 2 +1 = 4 |
| 1. Semen quality scores 2. USA [12]/USA [13] 3. Assess male fertility and reproductive capacity [12] | 1/0 | Cost: $100–200 (basic); up to $300 (with CASA and advanced morphology) [14] | 1. Highest for predicting pregnancy at DI-SQ score >110 = 35.8; for predicting live birth= 39.0 / sperm donors 2. As predictor of pregnancy: DI-SQ score >120 prefreeze = 93.4, >120 postthaw = 99.1, >115 prefreeze= 71.7, >115 postthaw=92.4, >110 prefreeze = 35.1, >110 postthaw= 71.2/sperm donors 3. CV(volume)= 36%, CV (density) = 63%, CV (count) = 69%, CV (motility) = 36%, CV (TMC) = 82%/ male youth at risk for infertility [15] 4. High intra-individual variability; influenced by abstinence period, lifestyle, and temperature [16] 5. Abnormal semen parameters correlate with subfertility but do not confirm infertility (some males with poor semen parameters conceive) [17] | 1 + 2 + 1 = 4 |
| 1. Androgen receptor function 2. USA, UK [18,19]/ Switzerland [20] 3. Evaluate genetic sensitivity of AR. Shorter AR-CAG repeats assoc w higher AR sensitivity, longer corr w reduced sensitivity[21] | 1/0 | Cost: $149 for cheek swab test, general genetic test cost is $100- $2000 [21] | 1. 0.48 at cutoff point in 19 rpt sequences (CAG19)/ Mexican men [22] 2. 0.70 at cutoff point in 19 rpt sequences (CAG19) 3. NR/ Mexican men [22] 4. Receptor expression is tissue-dependent [23] 5. Morning collection, fasting, androgen lvs varies with age and condition [24] | 1 + 2 + 1 = 4 |
| 1. Testosterone levels 2. Germany [25]/ Italy [26], USA [27], UK, Finland [28], Switzerland [20] 3. Assess testosterone levels, diagnose hyper and hypogonadism [25] | 5/0 | Cost: $55 (TT and cFT combined) [29] | 1. LOQ = ≤0.5 ng/dL/ men with infertility or sexual dysfunction [30] 2. AMR = 2–1200 ng/dL/ men with infertility or sexual dysfunction [30] 3. CV ≤ 15%; cut-off of 350 ng/dl should be used with LC-MS/MS for 2nd measurement/men with infertility or sexual dysfunction [29,31] 4. Varies diurnally, intra-individually, affected by SHBG levels, age, and assay variability [32], lifestyle factors, geography, genetics [33] 5. cFT clinically relevant more than TT in older adults and in conditions with altered SHBG (e.g., obesity, liver disease) [34] | 2 + 2 + 1 = 5 |
| 1. Dehydroepiandrosterone sulfate (DHEAS) levels 2. Germany [35]/ Switzerland [20] 3. Assess adrenal gland function for disorder, tumor dx [36] | 1/0 | Cost: $69 [36] | 1. LOQ= 0.05 ng/mL [37] 2. Avg accuracy = 105 % [37] 3. CV= <5%, ICC = >99% [37] 4. small sample sizes in existing validation studies, variation in assays and cutoffs [38] 5. Morning collection, fasting, androgen lvs varies with age and condition [24] | 1 + 2 + 2 = 5 |
| 1. Sex hormone binding globulin (SHBG) levels 2. NR/UK, Finland [28], USA [27] 3. Assess reasons for abnormal testosterone levels [39] | 2/0 | Cost: $50-$150 [39] | 1. 0.656 w cutoff point at 26.75/ Chinese women w PCOS [40] 2. 0.698 w cutoff point at 26.75/ Chinese women w PCOS [40] 3. COBAS e411 CLIA w sandwich method: Intra-assay CVs are 2.1%, 2.4%, and 2.7% at 14, 44, and 204 nmol/L, respectively. Inter-assay CVs are 2.7% at 14 nmol/L and 5.6% at 204 nmol/L./ healthy men [41] 4. Varies diurnally, with age and condition, peaks in afternoon hour [33] | 2 + 2 + 1 = 5 |
| 1. Free Androgen Index; 2. NR [42]/ Switzerland [20] 3. assessing the circulating testosterone availability in female hirsutism [42] | 1/0 | Cost: depends on TT and SHBG costs | 1. 90% at cut-off value 3.45, 89% at cut-off 6.15/adolescent females w PCOS [43] 2. 84% at cut-off value 3.45, 77% at cut-off 6.15/ adolescent females w PCOS [43] 3. CV = 20.5%/ healthy and androgen deficient women [44] 4. Poor correlation with FT at low levels, relies on accuracy of TT and SHBG [33] 5. Can only be used in females since SHGB binding capacity must exceed testosterone conc, morning collection, fasting, androgen lvs varies with age and condition [24] | 1 + 1 + 1 = 3 |

Abbreviations**: A, androstenedione; AMR, analytical measurement range; AR, androgen receptor; BPH, benign prostatic hyperplasia; CASA, computer-assisted semen analysis; cFT, calculated free testosterone; Conc, concentration; CAG19, 19 CAG repeats in androgen receptor gene; CAD, coronary artery disease; CLIA, Clinical Laboratory Improvement Amendments; COBAS, automated immunoassay system; CV, coefficient of variation; DHEAS, dehydroepiandrosterone sulfate; DI-SQ, diagnostic semen quality score; FAI, free androgen index; ICC, intraclass correlation coefficient; LC-MS/MS, liquid chromatography–tandem mass spectrometry; LOQ, limit of quantitation; NM, not mentioned/not reported; OHIP, Ontario Health Insurance Plan; PBMC, peripheral blood mononuclear cells; PHI, Prostate Health Index; PCOS, polycystic ovary syndrome; PSA, prostate-specific antigen; SHBG, sex hormone-binding globulin; T, testosterone; TMC, total motile count; TT, total testosterone; w/o, without.**
