# Supplementary material for: Systematic review of instruments for measuring sex and gender attributes: Assessment of measurement properties and utility in research on clinical and functional outcomes
Source: Research Square preprint supplement (doi:10.21203/rs.3.rs-7754711/v1), 2025-10-15
Supplement: Supplementary file 11 [file cbec2eee9c0685445b01c6f7.docx]

**Table of Contents**

[Attitudes Towards Women Scale (ATWS) 2](#_Toc210117862)

[Bem Sex Role Inventory (BSRI) 6](#_Toc210117863)

[Conformity to Feminine Norms Inventory (CFNI)  8](#_Toc210117864)

[Conformity to Masculine Norms Inventory (CMNI) 12](#_Toc210117865)

[Drive for Muscularity Scale (DMS) 15](#_Toc210117866)

[Feminine Ideology Scale (FIS) 18](#_Toc210117867)

[Femininity Score (FS) 21](#_Toc210117868)

[Gender Role Conflict Scale (GRCS) 24](#_Toc210117869)

[Gender Self-Report (GSR) 29](#_Toc210117870)

[Gendered Views of Nursing Careers Scale 32](#_Toc210117871)

[Gender-Equitable Men (GEM) Scale 34](#_Toc210117872)

[GENESIS-PRAXY Gender Index 39](#_Toc210117873)

[Macho Scale 42](#_Toc210117874)

[Male Role Attitudes Scale (MRAS) 44](#_Toc210117875)

[Masculine Gender Role Discrepancy Stress Scale 46](#_Toc210117876)

[Masculine Gender-Score 49](#_Toc210117877)

[Masculine Measure 52](#_Toc210117878)

[Male Role Norms Inventory (MRNI) 54](#_Toc210117879)

[Masculinity in Chronic Disease Inventory (MCD-I) 58](#_Toc210117880)

[Minnesota Multiphase Personality Inventory 61](#_Toc210117881)

[Normative Male Alexithymia Scale (NMAS) 63](#_Toc210117882)

[Personal Attributes Questionnaire 65](#_Toc210117883)

[Self-Perceived Gender Expression (W5) 67](#_Toc210117884)

[Sex-Typed Behaviours and Attitudes Score 69](#_Toc210117885)

# **Attitudes Towards Women Scale (ATWS)**

| Descriptive | Development (Language, Author(s), Year) | Developed in English by Spence and Helmreich in 1972.1 In 1973, they developed the short-form version consisting of 25 items2 and, in 1978, they developed the 15-item version3 |
| --- | --- | --- |
| Purpose | Assess attitudes toward the roles and rights of women in society |
| Content | The items on the 55-item version pertain to six areas:   1. Vocational, educational, and intellectual roles 2. Freedom and independence 3. Dating, courtship, and etiquette 4. Drinking, swearing, and dirty jokes 5. Sexual behavior 6. Marital relations and obligations   The 15-item and 25-item2 versions contain a subset of the items on the longer version, which pertain to the rights, roles, and privileges of women |
| Response – Options | A 4-point Likert scale ranging from "agree strongly" to “disagree strongly”. Response options are (A) agree strongly, (B) agree mildly, (C) disagree mildly, or (D) disagree strongly |
| Recall Period | Not applicable |
| Endorsement from Evidence-based Measures of Empowerment for Research on Gender Equality (EMERGE) | The 25-item version is rated on EMERGE:   - Psychometric score: medium - Ease of use score: no data4 |
| Practical | To Obtain | For the full 55-item version refer to:   - Spence, J. T., & Helmreich, R. (1972). The Attitudes Toward Women Scale: An objective instrument to measure attitudes toward the rights and roles of women in contemporary society. *Catalog of Selected Documents in Psychology*, 2(66).   The 15-item and 25-item versions are freely available online:   - 15-item: <https://www.wcasa.org/wp-content/uploads/2020/05/Evaluation_17.-aws.pdf> - 25-item: <https://emerge.ucsd.edu/r_22vvh5psjgfydx2/> |
| Scoring and Interpretation | Each item is given a score from 0 to 3, where agree strongly (A)= 0, agree mildly (B)=1, disagree mildly (C)=2, disagree strongly (D)=3, except for reverse coded items (marked with an asterisk). A high score indicates a profeminist, egalitarian attitude, while a low score indicates a traditional, conservative attitude4 |
| Respondent Burden | Time to complete not stated |
| Administrator Burden | Scoring can be performed manually |
| Critical appraisal and validation in other samples | 1. Reliability:   (a) internal consistency/sample  (b) test-retest reliability/sample  (c) measurement error   1. Hypothesis-testing (construct validity)/sample 2. Structural validity/sample 3. Researchers notes | 1. (a) 55-item α = 0.92, 25-item α = 0.89, 15-item α = 0.85 / female students, mothers, grandmothers5   (b) 15 item: 0.82/M, 0.86/F; 55 item: 0.89 – 0.95/ all class and sex groups; 25 item: NR5  (c) NR   1. 25 item: mean scores = 50.26, 41.9, 70.62/students, mothers, feminist org members (respectively)6 2. Short form strongly correlated with full form (r ≥ 0.95)/ students, mothers, fathers2 3. Intergenerational samples (students, mothers, fathers grandmothers)2,5 , feminist group members had sig higher score = valid measure of feminist attitudes6 |

**Attitudes Towards Women Scale (AWS) (15-item)**

The statements listed below describe attitudes toward the roles of women in society which different people have. There are no right or wrong answers, only opinions. You are asked to express your feeling about each statement by indicating whether you (A) agree strongly, (B) agree mildly, (C) disagree mildly, or (D) disagree strongly.

A ----------------------- B ----------------------- C ----------------------- D

Agree strongly Agree mildly Disagree mildly Disagree strongly

1. Swearing and obscenity are more repulsive in the speech of a woman than a man.
2. *Under modern economic conditions with women being active outside the home, men should share in household tasks such as washing dishes and doing laundry.
3. *It is insulting to women to have the “obey” clause remain in the marriage service.
4. *A woman should be free as a man to propose marriage.
5. Women should worry less about their rights and more about becoming good wives and mothers.
6. *Women should assume their rightful place in business and all the professions along with men.
7. A woman should not expect to go to exactly the same places or to have quite the same freedom of action as a man.
8. It is ridiculous for a woman to run a locomotive and for a man to darn socks.
9. The intellectual leadership of a community should be largely in the hands of men.
10. *Women should be given equal opportunity with men for apprenticeship in thevarious trades.
11. *Women earning as much as their dates should bear equally the expense when they go out together.
12. Sons in a family should be given more encouragement to go to college than daughters
13. In general, the father should have greater authority than the mother in the bringing up of the children.
14. *Economic and social freedom is worth far more to women than acceptance of the ideal of femininity which has been set up by men.
15. There are many jobs in which men should be given preference over women in being hired or promoted.

**Attitudes Toward Women Scale (AWS) (25-item)**

The statements listed below describe attitudes toward the roles of women in society which different people have. There are no right or wrong answers, only opinions. You are asked to express your feeling about each statement by indicating whether you (A) agree strongly, (B) agree mildly, (C) disagree mildly, or (D) disagree strongly.

A ----------------------- B ----------------------- C ----------------------- D

Agree strongly Agree mildly Disagree mildly Disagree strongly

1. Swearing and obscenity are more repulsive in the speech of a woman than of a man.
2. *Women should take increasing responsibility for leadership in solving the intellectual and social problems of the day.
3. *Both husband and wife should be allowed the same grounds for divorce.
4. Telling dirty jokes should be mostly a masculine prerogative.
5. Intoxication among women is worse than intoxication among men.
6. *Under modern economic conditions with women being active outside the home, men should share in household tasks such as washing dishes and doing the laundry.
7. *It is insulting to women to have the "obey" clause remain in the marriage service.
8. *There should be a strict merit system in job appointment and promotion without regard to sex.
9. *A woman should be free as a man to propose marriage.
10. Women should worry less about their rights and more about becoming good wives and mothers.
11. *Women earning as much as their dates should bear equally the expense when they go out together.
12. *Women should assume their rightful place in business and all the professions along with men.
13. A woman should not expect to go to exactly the same places or to have quite the same freedom of action as a man.
14. Sons in a family should be given more encouragement to go to college than daughters.
15. It is ridiculous for a woman to run a locomotive and for a man to darn socks.
16. In general, the father should have greater authority than the mother in the bringing up of children.
17. Women should be encouraged not to become sexually intimate with anyone before marriage, even their fiancés.
18. *The husband should not be favored by law over the wife in the disposal of family property or income.
19. Women should be concerned with their duties of childbearing and house tending rather than with desires for professional or business careers.
20. The intellectual leadership of a community should be largely in the hands of men.
21. *Economic and social freedom is worth far more to women than acceptance of the ideal of femininity which has been set up by men.
22. On the average, women should be regarded as less capable of contributing to economic production than are men.
23. There are many jobs in which men should be given preference over women in being hired or promoted.
24. *Women should be given equal opportunity with men for apprenticeship in the various trades.
25. *The modern girl is entitled to the same freedom from regulation and control that is given to the modern boy.

**References**

1. Spence, J. T., & Helmreich, R. (1972). The Attitudes Toward Women Scale: An objective instrument to measure attitudes toward the rights and roles of women in contemporary society. *Catalog of Selected Documents in Psychology*, 2(66).
2. Spence, J. T., Helmreich, R., & Stapp, J. (1973). A short version of the Attitudes toward Women Scale (AWS). *Bulletin of the Psychonomic Society*, 2, 219–220. <https://doi.org/10.3758/BF03329252>
3. Spence, J. T., & Helmreich, R. (1978). *Masculinity and femininity: Their psychological dimensions, correlates, and antecedents*. Austin, TX: University of Texas Press.
4. Attitudes toward Women Scale – Short Version. *EMERGE.* <https://emerge.ucsd.edu/r_22vvh5psjgfydx2/>. Accessed April 29, 2025.
5. Daugherty, C. G., & Dambrot, F. H. (1986). Reliability of the Attitudes toward Women Scale. Educational and Psychological Measurement, 46(2), 449-453. https://doi.org/10.1177/001316448604600221 (Original work published 1986)
6. Kilpatrick, D. G., & Smith, A. D. (1974). Validation of the Spence-Helmreich Attitudes towards Women Scale. Psychological Reports, 35(1), 461-462. <https://doi.org/10.2466/pr0.1974.35.1.461> (Original work published 1974)

# **Bem Sex Role Inventory (BSRI)**

| Descriptive | Development (Language, Author(s), Year) | Developed by in English by Sandra Bem in 1974, based on surveys of 100 Stanford undergraduates to identify socially desirable masculine and feminine traits1. In 1981, Bem developed the short-form version consisting of 30 items2 |
| --- | --- | --- |
| Purpose | Measure androgyny by assessing how individuals align with stereotypical masculine and feminine traits1 |
| Content | Originally 200 traits, narrowed to 60 different personality traits on which participants rate themselves. The traits are evenly distributed: 20 masculine, 20 feminine, and 20 filler traits thought to be gender neutral.1  The short-form version consists of 10 masculine, 10 feminine, and 10 gender neutral categories2 |
| Response – Options | A 7-point Likert scale, ranging from “never or almost never true” (1) to “always or almost always true” (7) |
| Recall Period | NA |
| Endorsement from Evidence-based Measures of Empowerment for Research on Gender Equality (EMERGE) | Rated on EMERGE3:   - Psychometric score: high - Ease of use score: medium |
| Practical | To obtain | Freely available online:   - <https://psytests.org/trait/bsrien.html> (computerized) - <https://emerge.ucsd.edu/r_1lsgbxgaam65ze3/> |
| Scoring and Interpretation | Each item is rated by the respondent, and then a score is calculated for both masculinity and femininity based on the responses:   - High masculinity and low femininity = masculine - High femininity and low masculinity = feminine - High masculinity and femininity = androgynous - Low masculinity and femininity = undifferentiated   Originally androgyny was calculated by finding the t-ratio difference between masculine and feminine scores; in 1981 Bem advised to utilize a split median technique for more accurate scoring1 |
| Respondent Burden | 10-15 minutes to complete1 |
| Administrator Burden | Relatively low; scoring can be done manually or via software3 |
| Critical appraisal and validation in other samples | 1. Reliability:   (a) internal consistency/ sample  (b) test-retest reliability/ sample  (c) measurement error   1. Hypothesis-testing (construct validity)/sample 2. Structural validity/sample 3. Researchers notes | 1. a) α = 0.77 for femininity, α = 0.78 for masculinity, α = 0.47 androgyny/ older adults8; α = 0.77 for femininity, α = 0.74 for masculinity/ high school students14; SB = 0.86 for masculinity, 0.82 for femininity, 0.77 for androgyny/males with drug abuse12   b) r=0.90 masculinity & femininity, r=0.93 androgyny, r=0.89 soc desirability/intro psych uni students1  c) captures Western notions of gender roles; 42.3% discrepancy in categorizations between original t-ratio and new median-based scoring4   1. KMO=0.9/ MSM7; ES for GR attitudes= -0.03/eating disorders8; KMO = 0.77/ Spanish older adults11; 51% masculine/ethnically diverse males, 55% feminine/ ethnically diverse females13 2. CFI=0.96/students9, Corr btwn fem and masc scales = -0.19/ heterosexual men10, -0.17/gay men10 3. Would be prudent to examine underlying factor loading5 |

Abbreviations used: α = Cronbach’s alpha; SB = Spearman-Bowman’s coefficient; KMO= Kaiser-Meyer-Olkin measure for sampling adequacy; MSM= men who have sex with men; GR= Gender role; ES= effect size; CFI= Compararive fit index; soc= social

**Bem Sex Role Inventory (BSRI)**

1 ------------ 2 ------------ 3 ----------- 4 ------------- 5 ------------ 6 ------------ 7

Never or almost never true Always or almost always true

| **Masculine Items**  1. Acts as a leader  2. Aggressive  3. Ambitious  4. Analytical  5. Assertive  6. Athletic  7. Competitive  8. Defends own beliefs  9. Dominant  10. Forceful  11. Has leadership abilities  12. Independent  13. Individualistic  14. Makes decisions easily  15. Masculine  16. Self-reliant  17. Self-sufficient  18. Strong personality  19. Willing to take a stand  20. Willing to take risks | **Feminine Items**  21. Affectionate  22. Cheerful  23. Childlike  24. Compassionate  25. Does not use harsh language  26. Eager to soothe hurt feelings  27. Feminine  28. Flatterable  29. Gentle  30. Gullible  31. Loves children  32. Loyal  33. Sensitive to the needs of others  34. Shy  35. Soft spoken  36. Sympathetic  37. Tender  38. Understanding  39. Warm  40. Yielding | **Neutral Items**  41. Adaptable  42. Conceited  43. Conscientious  44. Conventional  45. Friendly  46. Happy  47. Helpful  48. Inefficient  49. Jealous  50. Likable  51. Moody  52. Reliable  53. Secretive  54. Sincere  55. Solemn  56. Tactful  57. Theatrical  58. Truthful  59. Unpredictable  60. Unsystematic |
| --- | --- | --- |

**References**

1. Bem, S. L. (1974). The measurement of psychological androgyny. *Journal of Consulting and Clinical Psychology*, 42(2), 155–162. <https://doi.org/10.1037/h0036215>
2. Bem, S. L. (1981). *Bem Sex-Role Inventory: Professional manual.* Palo Alto: Consulting Psychologists Press
3. Bem Sex-Role Inventory. *EMERGE.* <https://emerge.ucsd.edu/r_1lsgbxgaam65ze3/>. Accessed April 29, 2025.
4. Gómez-Gil E, Gómez A, Cañizares S, Guillamón A, Rametti G, Esteva I, Vázquez A, Salamero-Baró M. Clinical utility of the Bem Sex Role Inventory (BSRI) in the Spanish transsexual and nontranssexual population. J Pers Assess. 2012;94(3):304-9. doi: 10.1080/00223891.2011.650302. Epub 2012 Jan 13. PMID: 22242861.
5. Smith M. , Deady, D. , Sharp, M. and Al-Dujaili, E. (2013) Sex-Role Orientation in Men Is Related to Salivary Testosterone Levels. *Journal of Behavioral and Brain Science*, **3**, 518-521. doi: [10.4236/jbbs.2013.37054](http://dx.doi.org/10.4236/jbbs.2013.37054)
6. Murnen SK & Smolak L (1997). Femininity, masculinity, and disordered eating: a meta-analytic review.. International Journal of Eating Disorders, 22(3), 231-42. [https://dx.doi.org/10.1002/(sici)1098-108x(199711)22:3<231::aid-eat2>3.0.co;2-o](https://dx.doi.org/10.1002/(sici)1098-108x(199711)22:3%3c231::aid-eat2%3e3.0.co;2-o)
7. Gasch Gallen A, Tomas Aznar C & Rubio Aranda E (2018). Assessing gender stereotypes and sexual risk practices in men who have sex with men.. Gaceta Sanitaria, 32(6), 519-525. <https://dx.doi.org/10.1016/j.gaceta.2017.05.001>
8. Ahmed T, Vafaei A, Belanger E, Phillips SP & Zunzunegui MV (2016). Bem sex role inventory validation in the international mobility in aging study.. Canadian Journal on Aging, 35(3), 348-60. <https://dx.doi.org/10.1017/S0714980816000404>
9. Choi, N., Fuqua, D. R., & Newman, J. L. (2007). Hierarchical Confirmatory Factor Analysis of the Bem Sex Role Inventory. Educational and Psychological Measurement, 67(5), 818–832. <https://doi.org/10.1177/0013164406299106>
10. Chung YB (1995). The construct validity of the bem sex-role inventory for heterosexual and gay men.. Journal of Homosexuality, 30(2), 87-97. <https://dx.doi.org/10.1300/j082v30n02_05>
11. Vafaei A, Alvarado B, Tomas C, Muro C, Martinez B & Zunzunegui MV (2014). The validity of the 12-item bem sex role inventory in older spanish population: an examination of the androgyny model.. Archives of Gerontology & Geriatrics, 59(2), 257-63. <https://dx.doi.org/10.1016/j.archger.2014.05.012>
12. Weiss RW & Russakoff S (1978). The sex role identity of male drug abusers.. Journal of Clinical Psychology, 34(4), 1010-3. [https://dx.doi.org/10.1002/1097-4679(197810)34:4<1010::aid-jclp2270340440>3.0.co;2-5](https://dx.doi.org/10.1002/1097-4679(197810)34:4%3c1010::aid-jclp2270340440%3e3.0.co;2-5)
13. Oswald PA (2004). An examination of the current usefulness of the bem sex-role inventory.. Psychological Reports, 94(3 Pt 2), 1331-6. <https://dx.doi.org/10.2466/pr0.94.3c.1331-1336>
14. Fernandez J & Coello MT (2010). Do the bsri and paq really measure masculinity and femininity?. Spanish Journal of Psychology, 13(2), 1000-9. https://dx.doi.org/10.1017/s113874160000264x

# **Conformity to Feminine Norms Inventory (CFNI)**

| Descriptive | Development (Language, Author(s), Year) | Developed in English by James R. Mahalik and colleagues in 2005 in a sample of 731 predominantly European American and heterosexual college students.1 In 2011, the scale was condensed in by Parent & Moradi into a 45-item abbreviated version based on a sample of 520 college-aged women who were also predominantly European American and heterosexual2 |
| --- | --- | --- |
| Purpose | Assess conformity to feminine norms1 |
| Content | CFNI-84 is a 84-item measure designed to assess 8 factors related to the degree of a woman’s conformity to American feminine norms:1   1. Nice in Relationships 2. Modesty 3. Domestic 4. Sexual Fidelity 5. Care for Children 6. Romantic Relationship 7. Thinness 8. Invest in Appearance   CFNI-45 is a 45-item measure assessing level of conformity to 9 stereotypically feminine norms:2   1. Sweet and Nice 2. Relational 3. Invest in Appearance 4. Domestic 5. Romantic Relationship 6. Modesty 7. Sexual Fidelity 8. Thinness 9. Care for Children |
| Response – Options | A 4-point Likert scale, ranging from “strongly disagree” (0) to “strongly agree” (3) |
| Recall Period | NA |
| Endorsement from Evidence-based Measures of Empowerment for Research on Gender Equality (EMERGE) | NR |
| Practical | To Obtain | Not available for direct, free download |
| Scoring and Interpretation | A total score is obtained, as well as a score in each subscale2. Higher scores indicate a higher degree of conformity to traditional American gender norms2,3. |
| Respondent Burden | Reduced with the introduction of the abbreviated 45-item version |
| Administrator Burden | The scale itself is relatively difficult to access for researchers intending to use it, as it is not included as a supplement in the articles detailing its development or validation nor is it provided for public access |
| Critical Appraisal Value | 1. Reliability:   (a) internal consistency  (b) test-retest reliability  (c) measurement error   1. Hypothesis-testing (construct validity) 2. Structural validity 3. Researchers notes | 1. (a) median α = .78, range α = .69-.92 /racially diverse USA undergraduate women2   (b) r = .82, over 2-3 weeks/ racially diverse USA undergraduate women2  (c) Adjusted validity correlations using correction for attenuation due to measurement error following recommendations for correcting for measurement unreliability in validity testing (Hoyt, Warbasse, & Chu, 2006; Schmitt, 1996)/ racially diverse USA undergraduate women2; 30 surveys missing over one third of items, 31 missing at least 20% of data on one or more measures of interest. Data appeared to be missing at random/ racially diverse USA undergraduate women2   1. Corrected subscale corr: range r= .49-.93, median r= .68/ racially diverse USA undergraduate women2 2. Nine-factor model: CFI = .90; RMSEA = .04, 90% CI [.04, .05]/ racially diverse USA undergraduate women2 3. Shows acceptable reliability, validity, and invariance across White women and women of color; supported as multidimensional tool for research and clinical use2 |

References

1. Mahalik, J. R., Morray, E. B., Coonerty-Femiano, A., Ludlow, L. H., Slattery, S. M., & Smiler, A. (2005). Development of the Conformity to Feminine Norms Inventory. Sex Roles, 52(7–8), 417–435. https://doi.org/10.1007/s11199-005-3709-7
2. Parent, M. C., & Moradi, B. (2011). An abbreviated tool for assessing feminine norm conformity: Psychometric properties of the Conformity to Feminine Norms Inventory–45. Psychological Assessment, 23(4), 958–969. https://doi.org/10.1037/a0024082
3. Brown, E. L., Ovrebo, E., Emery, H. E., & Stenersen, M. (2020). The Validity of the Conformity to Feminine Norms Inventory with Sexual and Gender Minority Women. Journal of LGBT Issues in Counseling, 14(1), 56–68. <https://doi.org/10.1080/15538605.2020.1711289>

# **Conformity to Masculine Norms Inventory (CMNI)**

| Descriptive | Development (Language, Author(s), Year) | Developed in English by James R. Mahalik et al. in 20031. The scale was initially validated in samples of predominantly Caucasian, heterosexual, young adult men across university campuses in North America1 |
| --- | --- | --- |
| Purpose | Assess extent to which a male individual conforms to cultural masculine norms in American society.1 |
| Content | Participants rate their own agreement with the attitudes presented in the 94 given items. The instrument is comprised 11 subscales, or domains of measure:   1. Winning 2. Emotional control 3. Risk-taking 4. Violence 5. Dominance 6. Playboy 7. Self-reliance 8. Primacy of work 9. Power over women 10. Disdain for homosexuals 11. Pursuit of status |
| Response – Options | A 4-point Likert scale, ranging from "strongly disagree” (0) "strongly agree" (3).1 These are meant to correspond to 4 domains of (non)conformity: extreme conformity, moderate conformity, moderate nonconformity, and extreme nonconformity1 |
| Recall Period | NA |
| Endorsement from Evidence-based Measures of Empowerment for Research on Gender Equality (EMERGE) | NR |
| Practical | To Obtain | Original paper available to researchers1; items available online at:  <https://scales.arabpsychology.com/s/conformity-to-male-norms-inventory-cmni/> |
| Scoring and Interpretation | Raw scores transformed to transformed scores using mean of 50 and SD of 10 and then interpreted to reflect one of four conformity statutes: 50.1 to 60 = moderate conformity, 49.99 to 40 = moderate nonconformity, 60.01 and above = extreme conformity, 39.99 and below = extreme nonconformity. This is done for the total scale and each subscale8. |
| Respondent Burden | The average time required to complete the original 144 item scale was 13 minutes.1 The time required to complete 94-item scale is 10-15 minutes8. |
| Administrator Burden | Scoring can done manually |
| Critical appraisal and validation in other samples | 1. Reliability:   (a) internal consistency/ sample  (b) test-retest reliability/ sample  (c) measurement error   1. Hypothesis-testing (construct validity)/sample 2. Structural validity/sample 3. Researchers notes | 1. (a) α = 0.86/ gay men2; corr btwn CMNI-46 and 29 subscale estimates: r=0.91 to 1.00/ Asian and White American college men3; CMNI-46: α = 0.83/adult men4; CMNI-55: α = 0.84, CMNI-22: α = 0.67 / adults attending counseling in USA5; CMNI-29: α = 0.68-0.91/young Brazilian men6; α = 0.87/undergraduate men, α = 0.75/ other levels of study6; α = 0.85/ married or partnered men, α =0.68/single men6   (b) r btwn pub year and total reliability score = -0.37/ ethincally diverse men inside and outside US across age groups6; CMNI-22: α =0.44-0.81/ Australian adult males in workforce7  (c) CMNI-46 more consistent for White participants/ Asian and White American college men3; interitem correlation: CMNI-22= 0.08, CMNI-55 = 0.09/ adults attending counseling in USA5   1. Convergent validity: CMNI-29 AVE = 0.42-0.78/ young Brazilian men6; CMNI-22 2. CFI=0.92, TLI=0.922/gay men; CFI=0.82/ Asian and White American college men3; CMNI-55: CFI=0.88/adults attending counseling in USA5 3. Researchers should be mindful of sample characteristics that may attenuate correlations and the potential number of items needed to   truly capture a global measure of masculinity.  Participants may not interpret the items  as a single construct of masculinity.5 |

**TLI=** Tucker Lewis Index;

**References**

1. Mahalik, J. R., Locke, B. D., Ludlow, L. H., Diemer, M. A., Scott, R. P. J., Gottfried, M., & Freitas, G. (2003). Development of the Conformity to Masculine Norms Inventory. *Psychology of Men & Masculinity*, 4(1), 3–25. <https://doi.org/10.1037/1524-9220.4.1.3>
2. Alt M, Lewis AM, Liu WM, Vilain E & Sanchez FJ (2014). On the validity of popular masculinity rating scales with gay men.. Archives of Sexual Behavior, 43(8), 1547-57. <https://dx.doi.org/10.1007/s10508-014-0363-6>
3. Hsu K & Iwamoto DK (2014). Testing for measurement invariance in the conformity to masculine norms-46 across white and asian american college men: development and validity of the cmni-29.. Psychology of Men & Masculinity, 15(4), 397-406. <https://dx.doi.org/10.1037/a0034548>
4. Levant RF, Hall RJ, Weigold IK & McCurdy ER (2015). Construct distinctiveness and variance composition of multi-dimensional instruments: three short-form masculinity measures.. Journal of Counseling Psychology, 62(3), 488-502. <https://dx.doi.org/10.1037/cou0000092>
5. Owen J (2011). Assessing the factor structures of the 55- and 22-item versions of the conformity to masculine norms inventory.. American Journal of Mens Health, 5(2), 118-28. <https://dx.doi.org/10.1177/1557988310363817>
6. Kivisalu, T. M., King, C., Phillips, C. E., & O'Toole, S.,K. (2015). RELIABILITY GENERALIZATION OF THE CONFORMITY TO MASCULINE NORMS INVENTORY (CMNI). Race, Gender & Class, 22(1), 173-188. Retrieved from <http://myaccess.library.utoronto.ca/login?qurl=https%3A%2F%2Fwww.proquest.com%2Fscholarly-journals%2Freliability-generalization-conformity-masculine%2Fdocview%2F1757045395%2Fse-2%3Faccountid%3D14771>
7. Milner A, Kavanagh A, King T & Currier D (2018). The influence of masculine norms and occupational factors on mental health: evidence from the baseline of the australian longitudinal study on male health.. American Journal of Mens Health, 12(4), 696-705. <https://dx.doi.org/10.1177/1557988317752607>
8. Mahalik, J. R., Talmadge, W. T., & Locke, B. D. (2005). Using the Conformity to Masculine Norms Inventory to Work With Men in a Clinical Setting. Journal of Clinical Psychology, 61(6), 661–674. https://doi-org.myaccess.library.utoronto.ca/10.1002/jclp.20101

# **Drive for Muscularity Scale (DMS)**

| Descriptive | Development (Language, Author(s), Year) | Developed in English by Donald R. McCreary and Doris K. Sasse in 2000 from a sample of 197 high school students aged 16 to 24 years (101 girls and 96 boys) from Mississauga, Ontario, Canada1 |
| --- | --- | --- |
| Purpose | Assess the drive for muscularity constructby measuring muscularity-oriented attitudes and behaviours1 |
| Content | A 15-item instrument composed of two subscales:   1. Muscularity-Oriented Body Image 2. Muscularity-Oriented Behaviours1   The Muscularity-Oriented Body Image subscale measures the cognitive/attitudinal components associated with the drive for muscularity, while the Muscularity-Oriented Behaviours subscale captures the behavioural strategies employed to develop a more muscular physique |
| Response – Options | A 6-point Likert scale, ranging from “always” to “never”. Some items are reverse-scored*. |
| Recall Period | Not applicable |
| Endorsement from Evidence-based Measures of Empowerment for Research on Gender Equality (EMERGE) | Rated on EMERGE:   - Psychometric score: medium - Ease of use score: high2 |
| Practical | To Obtain | Freely available online:  <https://spartan.ac.brocku.ca/~dmccreary/Drive_for_Muscularity_Scale.html> |
| Scoring and Interpretation | Scoring involves an averaging of items3 to yield a total score alongside two subscale scores1. A higher score indicates a greater drive for muscularity4. |
| Respondent Burden | Relatively low; the instrument possesses a small number of items that can be completed in little time |
| Administrator Burden | Relatively low, the low number of items gives less for the researchers to score |
| Critical appraisal and validation in other samples | 1. Reliability:   (a) internal consistency/ sample  (b) test-retest reliability/ sample  (c) measurement error   1. Hypothesis-testing (construct validity)/sample 2. Structural validity/sample 3. Researchers notes | 1. (a) α = 0.89/male uni students in Buenos Aires5/ α =0.88/male uni students in Mexico6   (b) corr btwn MB subscale time 1 and 2 = 0.84, corr btwn MBI subscale time 1 and 2 = 0.73 (6 wks) /male uni students in USA7  (c) RMSEA = 0.049/ male uni students in Buenos Aires5; RMSEA = 0.04/ male uni students in Mexico6   1. CV= 0.92, 0.71, DV=0.19/male uni students in Buenos Aires5; KMO= 0.86/male uni students in Mexico6 2. CFI= 0.99/male uni students in Buenos Aires5/ CFI= 0.98/ male uni students in Mexico6 3. Research has suggested that the subscales of the DMS be investigated separately (MBI and MB)7 |

MBI= muscularity-oriented body image, MB= muscularity behavior, RMSEA= root mean square error of approximation

**Drive for Muscularity Scale (DMS)2**

1 ---------------- 2 ---------------- 3 --------------- 4 ----------------- 5 ---------------- 6

Always Very often Often Sometimes Rarely Never

1. I wish that I were more muscular
2. I lift weights to build up muscle
3. I use protein or energy supplements
4. I drink weight-gain or protein shakes
5. I try to consume as many calories as I can in a day
6. I feel guilty if I miss a weight-training session
7. I think I would feel more confident if I had more muscle mass
8. Other people think I work out with weights too often
9. I think that I would look better if I gained 10 pounds in bulk
10. I think about taking anabolic steroids
11. I think I would feel stronger if I gained a little more muscle mass
12. I think that my weight-training schedule interferes with other aspects of my life
13. I think that my arms are not muscular enough*
14. I think that my chest is not muscular enough*
15. I think that my legs are not muscular enough*

**References**

1. McCreary, D. R., & Sasse, D. K. (2000). An Exploration of the Drive for Muscularity in Adolescent Boys and Girls. *Journal of American College Health*, *48*(6), 297–304. <https://doi.org/10.1080/07448480009596271>
2. Drive for Muscularity. *EMERGE*. <https://emerge.ucsd.edu/r_1jhvf8uijv7xaau/>. Accessed April 29, 2025.
3. Diaz, F. D., Shope, M. M., & Culbert, K. M. (2020). An examination of pubertal timing effects on drive for muscularity in men. *Psychology of Men & Masculinities, 21*(4), 655–664. [https://doi.org/10.1037/men0000306](https://psycnet.apa.org/doi/10.1037/men0000306)
4. McCreary, D. R., Sasse, D. K., Saucier, D. M., & Dorsch, K. D. (2004). Measuring the Drive for Muscularity: Factorial Validity of the Drive for Muscularity Scale in Men and Women. Psychology of Men & Masculinity, 5(1), 49–58. <https://doi.org/10.1037/1524-9220.5.1.49>
5. Compte EJ, Sepulveda AR, de Pellegrin Y & Blanco M (2015). Confirmatory factor analysis of the drive for muscularity scale-s (dms-s) and male body attitudes scale-s (mbas-s) among male university students in buenos aires.. Body Image, 14, 13-9. <https://dx.doi.org/10.1016/j.bodyim.2015.02.005>
6. Escoto C, Alvarez-Rayon G, Mancilla-Diaz JM, Camacho Ruiz EJ, Franco Paredes K & Juarez Lugo CS (2013). Psychometric properties of the drive for muscularity scale in mexican males.. Eating & Weight Disorders: EWD, 18(1), 23-8. <https://dx.doi.org/10.1007/s40519-013-0010-6>
7. Litt D & Dodge T (2008). A longitudinal investigation of the drive for muscularity scale: predicting use of performance enhancing substances and weightlifting among males.. Body Image, 5(4), 346-51. https://dx.doi.org/10.1016/j.bodyim.2008.04.002

# **Feminine Ideology Scale (FIS)**

| Descriptive | Development (Language, Author(s), Year) | Developed in English by Ronald Levant et al. in 2007 based on the work of Philpot and her students at Florida Institute of Technology. Philpot et al. generated 166 statements regarding traditional feminine norms and analyzed the responses of 292 male and female participants using principal component analysis with Varimax rotation. They specified a five-factor structure. Items that had factor loadings greater than 0.45 on a given factor and did not load strongly on another factor were selected to compose the 45-item scale1 Levant et al. reported on the psychometric properties of the scale from the responses of 407 undergraduate students (192 men, 210 women and 5 sex not reported) in the USA1 |
| --- | --- | --- |
| Purpose | Assess the degree to which respondents endorse traditional femininity ideology |
| Content | A 45-item scale consisting of five factors related to traditional femininity ideology:   1. Stereotypic images and activities 2. Dependency 3. Purity 4. Caretaking 5. Emotionality1 |
| Response – Options | A 5-point Likert scale, ranging from with “strong disagreement” (1) to “strong agreement” (5) |
| Recall Period | Not applicable |
| Endorsement from Evidence-based Measures of Empowerment for Research on Gender Equality (EMERGE) | Rated on EMERGE:   - Psychometric score: high - Ease of use score: high2 |
| Practical | To Obtain | Freely available online:  <https://emerge.ucsd.edu/r_ciag6s920micp4l/> |
| Scoring and Interpretation | Items averaged to generate score, where a higher score means stronger adherence to traditional femininity ideology1. To calculate factor scores, add item scores for that subscale, then divide by the number of items in that subscale. To calculate the Total Traditional Score, add the scores on the five traditional factors and divide by 451 |
| Respondent Burden | Estimated response time not provided [sample] |
| Administrator Burden | Administrator burden not provided |
| Critical Appraisal Value | Strengths/Cautions/Clinical and Research Applicability | 1. a) Total α = .85/ community and college male & females3   b) NR  c) Small effect sizes (dMACS = 0.043–0.448) for non-invariant items indicate minor measurement error across groups4   1. KMO= .93 / community and college male & females3 2. CFI=.915, RMSEA=.165/community and college male & females3; CFI = 0.96, RMSEA = 0.06 [0.06, 0.06] / Black and White community dwellers and college students4 3. Reliably measures traditional femininity ideology across Black and White participants, showing equivalent factor structure and metric invariance, though partial scalar non-invariance suggesting small response biases |

**Femininity Ideology Scale (FIS)**

1 -------------------- 2 --------------------3 --------------------4--------------------5

Strongly disagree Disagree Neutral Agree Strongly agree

**Stereotypic Images and Activities**

1. Women should have large breasts.

2. A woman should have a petite body.

3. Women should have soft voices.

4. A woman should wear attractive clothing, shoes, lingerie and bathing suits, even if not comfortable.

5. It is unlikely that a pregnant woman would be attractive.

6. A girl should be taught how to catch a husband.

7. It is expected that a woman who expresses irritation or anger must be going through P.M.S.

8. Girls should not enjoy “tomboy” activities.

9. It is more appropriate for a female to be a teacher than a principal.

10. A woman should not be expected to do mechanical things.

11. A woman should not show anger.

**Dependency/Deference**

12. Women should not want to succeed in the business world because men will not want to marry them.

13. A woman should not expect to be sexually satisfied by her partner.

14. A woman should not make more money than her partner.

15. A woman’s worth should be measured by the success of her partner.

16. A woman should not consider her career as important as a man’s.

17. A woman should not be competitive.

18. Women should have men make decisions for them.

19. Women should act helpless to attract a man.

20. A woman should not marry a younger man.

21. A woman should not initiate sex.

**Purity**

22. Women should not read pornographic material.

23. A woman should remain a virgin until she is married.

24. It is not acceptable for a woman to masturbate.

25. A woman should not tell dirty jokes.

26. A woman should not swear.

27. A woman should not have a baby until she is married.

28. A woman should be dependent on religion and spirituality for guidance.

29. Women should dress conservatively so they do not appear loose.

30. If a woman chooses to have an abortion, she should not feel guilty.

**Caretaking**

31. An appropriate female occupation is nursing.

32. When someone’s feelings are hurt, a woman should try to make them feel better.

33. A woman should know how people are feeling.

34. Women should be gentle.

35. A woman’s natural role should be the caregiver of the family.

36. A woman should be responsible for teaching family values to her children.

37. A woman should be responsible for making and organizing family plans.

**Emotionality**

38. It is expected that a women will be viewed as overly emotional.

39. It is expected that women will have a hard time handling stress without getting emotional.

40. It is expected that women in leadership roles will not be taken seriously.

41. It is expected that a single woman is less fulfilled than a married woman.

42. It is expected that a women will engage in domestic hobbies such as sewing and decorating.

43. It is likely that a woman who gives up custody of her children will not be respected.

44. It is expected that women will discuss their feelings with one another.

45. It is expected that women will not think logically.

**References**

1. Levant, R., Richmond, K., Cook, S., House, A. T., & Aupont, M. (2007). The Femininity Ideology Scale: Factor structure, reliability, convergent and discriminant validity, and social contextual variation. Sex Roles, 57(5-6), 373-383. [https://doi.org/10.1007/s11199-007-9258-5 2](https://doi.org/10.1007/s11199-007-9258-5%202).
2. Femininity Ideology Scale. EMERGE. https://emerge.ucsd.edu/r_ciag6s920micp4l/. Accessed April 29, 2025.
3. Levant, R. F., Alto, K. M., McKelvey, D. K., Richmond, K. A., & McDermott, R. C. (2017). Variance composition, measurement invariance by gender, and construct validity of the Femininity Ideology Scale-Short Form. Journal of Counseling Psychology, 64(6), 708–723. <https://doi.org/10.1037/cou0000230>
4. McKelvey, D., Levant, R., McDermott, R., Borgogna, N., Alto, K., & Richmond, K. (2020). Measurement invariance by race (black, white) of the femininity ideology scale-short form. Women & Health, 61(3), 289–293. <https://doi.org/10.1080/03630242.2020.1862387>

# **Femininity Score (FS)**

| Descriptive | Development (Language, Author(s), Year) | Developed in English by Levinsson et al. in 2022. Selected 5 variables identified as stereotypically feminine in the literature with matching information in the UK Biobank (education level, work status, depression, risk-taking, neuroticism, and the control variable birth year) to construct a tool for quantification of femininity. The variables were regressed on sex to construct the FS, validated using tenfold cross-validation1 |
| --- | --- | --- |
| Purpose | Quantify femininity and enable conduct of “gender-aware epidemiological studies to explain variations in diagnoses and disease outcomes including CHD among men and women that are not fully accounted for by sex alone”1 |
| Content | Score derived from a weighted measure of socio-cultural and economic variables1 |
| Response – Options | Education:   - NVQ/HND/HNC/equiv - College or university degree - A levels/AS levels/equiv - CSE/equiv - O levels/GSCEs/equiv - Other - None of the above   Employment:   - Unemployed - Unable to work due to sickness/disability - Paid employment/self employed - Full or part time student - Unpaid or volunteer work - Taking care of home and family - None of the above   Depression, frequency of depressed mood in the last 2 weeks (4-point Likert scale):   - Not at all (1) - Several days (2) - More than half the days (3) - Nearly every day (4)   Risk-taking:   - Yes - No   Neuroticism score, number of “Yes” answers across twelve questions (Yes, No, Do not know, Prefer not to answer):   1. Does your mood often go up and down? 2. Do you ever feel 'just miserable' for no reason? 3. Are you an irritable person? 4. Are your feelings easily hurt? 5. Do you often feel 'fed-up'? 6. Would you call yourself a nervous person? 7. Are you a worrier? 8. Would you call yourself tense or 'highly strung'? 9. Do you worry too long after an embarrassing experience? 10. Do you suffer from 'nerves'? 11. Do you often feel lonely? 12. Are you often troubled by feelings of guilt? 1 |
| Recall Period | Not applicable |
| Endorsement from Evidence-based Measures of Empowerment for Research on Gender Equality (EMERGE) | Not available on EMERGE |
| Practical | To Obtain | Available in the open access publication1 |
| Scoring and Interpretation | Formula:1  FS = intercept + β1*education + β2*work status + β3*depression + β4*risk-taking + β5*neuroticism + β6*birth year  FS = - 5.08470187338465 + 0.19807196894789*education + 0.042026387488911*work status - 0.006756305442782*depression + 0.173153140282766*risk-taking + 0.020797148428804*neuroticism + 0.002134711107064*birth year |
| Respondent Burden | Estimated response time not provided |
| Administrator Burden | Administrator burden not provided |
| Critical Appraisal Value | Strengths/Cautions/Clinical and Research Applicability | 1. a) NR   b) NR  c) NR  2) NR  3) RMSEA = 0.47~0.50/data from UK Biobank1  Due to the recent development of the tool and use in only one study, more research on the validity and reliability of the FS needs to be done |

**References**

1. Levinsson, A., de Denus, S., Sandoval, J., Lemieux Perreault, L. P., Rouleau, J., Tardif, J. C., Hussin, J., & Dubé, M. P. (2022). Construction of a femininity score in the UK Biobank and its association with angina diagnosis prior to myocardial infarction. *Scientific reports*, 12(1), 1780. https://doi.org/10.1038/s41598-022-05713-x

# **Gender Role Conflict Scale (GRCS)**

| Descriptive | Development (Language, Author(s), Year) | Developed in English by O'Neil et al. in 1986 based on responses of 527 undergraduate men at two Midwestern universities enrolled in introductory psychology classes. Developed two scales Gender Role Conflict Scale I and II (GRCS-I and GRCS- II, respectively).1 In 2012, Wester et al. developed of a short form of the tool, the GRCS-SF2 |
| --- | --- | --- |
| Purpose | Measure men's gender-role conflict patterns by assessing (1) men's thoughts and feelings about their gender-role behaviors, and (2) men's degree of conflict and comfort in particular situations1 |
| Content | The GRSC-I consists of 37 items and 4 factors:   1. Success, power, competition 2. Restrictive emotionality 3. Restrictive affectionate behavior between men 4. Conflicts between work and family relations   Each item requires the respondent to rate their attitudes or behaviors1  The GRSC-II consists of 16 items and 4 factors:   1. Success, power, competition 2. Homophobia 3. Lack of emotional response 4. Public embarrassment from gender role deviance   Each item requires the respondent to rate their level of conflict or comfort in a concrete gender-related situation1 |
| Response – Options | - GRCS-I: 6-point Likert scale, ranging from “strongly disagree” (1) to “strongly agree” (6) - GRCS-II: 4-point Likert scale, ranging from “no conflict-very comfortable” (1) to “very much conflict-very uncomfortable” (4) |
| Recall Period | Not specified |
| Endorsement from Evidence-based Measures of Empowerment for Research on Gender Equality (EMERGE) | All three versions of the instrument are rated on EMERGE:   - GRCS-I: medium psychometric score, high ease of use score3 - GRCS-II: medium psychometric score, medium ease of use score4 - GRCS-SF: medium psychometric score, high ease of use score5 |
| Practical | To Obtain | - GRCS-I: <https://emerge.ucsd.edu/r_1goo4iqgrwdsipv/> - GRCS-II: <https://emerge.ucsd.edu/r_1goo4iqgrwdsipv2/> - GRCS-SF: <https://emerge.ucsd.edu/r_w8vqzpneyurktuz/> |
| Scoring and Interpretation | A high score indicates greater gender-role conflict and fear about femininity1 |
| Respondent Burden | Estimated response time not provided |
| Administrator Burden | Administrator burden not provided |
| Critical Appraisal Value | Strengths,  Cautions,  Clinical Applicability | 1. a) 37-item: α = 0.868/ White, Black, and Asian male nursing students6; α =0.93/, non-heterosexual White and racial minority men residing in the US7;16-item: α = 0.77-0.80 for subscales/ White and racial/ethnic minority men2   b) 4-week range = 0.72- 0.868,9  c) NR   1. GRCS-SF subscales corr w full-form subscales: r = 0.24 – 0.96/White and racial minority college men residing in the US2; intercorr btwn GRCS and subscales r= 0.31 – 0.83/ White, Black, and Asian male nursing students6, non-heterosexual White and racial minority men residing in the US7 2. 37-item: CFI = 0.79, RMSEA=0.06/gay men7; CFI= 0.82/non-heterosexual White and racial minority men residing in the US7; 16 item: CFI = 0.96, TLI = 0.96, RMSEA=0.057/ heterosexual and non-heterosexual White and racial/ethnic minority men2   Assumed that research w no data on sexual orientation was reported involved predominately heterosexual men. Explanatory power of findings is limited by previous research. Researchers need to regularly assess participants’ sexual orientation/ heterosexual and non-heterosexual White and racial/ethnic minority men2 |

**Gender-Role Conflict Scale I (GRCS-I)**

1 --------------- 2 --------------- 3 --------------- 4 --------------- 5 --------------- 6

Strongly disagree Strongly agree

Success, power, competition

1. Moving up the career ladder is important to me.

2. Making money is part of my idea of being a successful man.

3. I sometimes define my personal value by my career success.

4. I evaluate other people's value by their level of achievement and success.

5. I worry about failing and how it affects my doing well as a man.

6. Doing well all the time is important to me.

7. I often feel that I need to be in charge of those around me.

8. Competing with others is the best way to succeed.

9. Winning is a measure of my value and personal worth.

10. I strive to be more successful than others.

11. I am often concerned about how others evaluate my performance at work or school.

12. Being smarter or physically stronger than other men is important to me.

13. I like to feel superior to other people.

Restrictive emotionality

14. I have difficult telling others I care about them.

15. Strong emotions are difficult for me to understand.

16. Expressing feelings makes me feel open to attack by other people.

17. Talking (about my feelings) during sexual relations is difficult for me.

18. I have difficulty expressing my emotional needs to my partner.

19. I have difficulty expressing my tender feelings.

20. Telling others of my strong feelings is not part of my sexual behavior.

21. I often have trouble finding words that describe how I am feeling.

22. I do not like to show my emotions to other people.

23. Telling my partner my feelings about him/her during sex is difficult for me.

Restrictive affectionate behavior between men

24. Verbally expressing my love to another man is difficult for me.

25. Affection with other men makes me tense.

26. Expressing my emotions to other men is risky.

27. Men who touch other men make me uncomfortable.

28. Hugging other men is difficult for me.

29. I am sometimes hesitant to show my affection to men because of how others might perceive me.

30. Being very personal with other men makes me feel uncomfortable.

31. Men who are overly friendly to me, make me wonder about their sexual preference (men or women).

Conflicts between work and family relations

32. I feel torn between my hectic work schedule and caring for my health.

33. My career, job, or school affects the quality of my leisure or family life.

34. Finding time to relax is difficult for me.

35. My needs to work or study keep me from my family or leisure more than I would like.

36. My work or school often disrupts other parts of my life (home, health, leisure).

37. Overwork, and stress, caused by a need to achieve on the job or in school, affects/hurts my life.

**Gender-Role Conflict Scale II (GRCS-II)**

1 ------------------- 2 -------------------- 3 ------------------- 4

No conflict-very comfortable Very much conflict-very uncomfortable

Success, power, competition

1. How much conflict do you feel about your brother's success compared to your own job as a plumber's supply truck driver?

2. How much conflict do you feel between your poor performance and your desired level of performance?

3. How conflicted do you feel that her salary is much higher than yours during a conversation with this new couple you have just met?

4. How conflicted would you feel with your desire to have intercourse and your inability to achieve an erection?

5. How comfortable/uncomfortable do you feel with your lower grades compared to your friends' grades?

6. How conflicted do you feel about your low ranking and that they will be known by your other colleagues?

Homophobia

7. How comfortable/uncomfortable would you feel talking during intermission to this person who is a known homosexual?

8. At the bar you notice that an unknown man is staring at you and then comes over to introduce himself. How comfortable/uncomfortable would you feel talking to this man?

9. Under these conditions, how conflicted would you feel as a heterosexual male going out with a man thought to be gay?

10. How much conflict do you feel between your admiration for this person and the fact that he is a homosexual?

Lack of emotional response

11. How comfortable/uncomfortable are you responding to your friends' intense emotions and fears about employment?

12. How comfortable/uncomfortable are you responding to your friends' intense emotions and fears about employment?

13. Disregarding your sadness of his dying state, how comfortable/uncomfortable are you specifically with your father's expression of love for you?

Public embarrassment from gender-role deviance

14. How comfortable/uncomfortable do you feel with this public display or affection?

15. How comfortable/uncomfortable do you feel carrying a woman's purse in front of people in the restaurant?

16. How conflicted do you feel about what your male co-worker might think about your contact and relationship with your intimate friend?

**Gender-Role Conflict Scale-Short Form (GRCS-SF)**

1 --------------- 2 --------------- 3 --------------- 4 --------------- 5 --------------- 6

Strongly disagree Strongly agree

Restricted Emotionality

1. Talking (about my feelings) during sexual relations is difficult for me.

2. I have difficulty expressing my emotional needs to my partner.

3. I have difficulty expressing my tender feelings.

4. I do not like to show my emotions to other people.

Success, Power, and Competition

5. Winning is a measure of my value and personal worth.

6. I strive to be more successful than others.

7. Being smarter or physically stronger than other men is important to me.

8. I like to feel superior to other people.

Restrictive Affectionate Behavior Between Men

9. Affection with other men makes me tense.

10. Men who touch other men make me uncomfortable.

11. Hugging other men is difficult for me.

12. Being very personal with other men makes me feel uncomfortable.

Conflicts Between Work and Family Relations

13. Finding time to relax is difficult for me.

14. My needs to work or study keep me from my family or leisure more than I would like.

15. My work or school often disrupts other parts of my life (home, health, leisure, etc).

16. Overwork and stress, caused by a need to achieve on the job or in school, affects/hurts my life.

**References**

1. O'Neil, J. M., Helms, B. J., Gable, R. K., David, L., & Wrightsman, L. S. (1986). Gender-role conflict scale: College men's fear of femininity. *Sex Roles*, 14(5–6), 335–350. <https://doi.org/10.1007/BF00287583>
2. Wester, S. R., Vogel, D. L., O'Neil, J. M., & Danforth, L. (2012). Development and evaluation of the Gender Role Conflict Scale Short Form (GRCS-SF). *Psychology of Men & Masculinity*, 13(2), 199–210. <https://doi.org/10.1037/a0025550>
3. Gender-Role Conflict Scale I. *EMERGE*. <https://emerge.ucsd.edu/r_1goo4iqgrwdsipv/>. Accessed April 29, 2025.
4. Gender-Role Conflict Scale II. *EMERGE*. <https://emerge.ucsd.edu/r_1goo4iqgrwdsipv2/>. Accessed April 29, 2025.
5. Gender-Role Conflict Scale-Short Form (GRCS-SF). *EMERGE*. <https://emerge.ucsd.edu/r_w8vqzpneyurktuz/>. Accessed April 29, 2025.
6. Christensen, M., Purkis, N., Morgan, R., & Allen, C. (2021). Does the nursing curriculum influence feelings of gender-role conflict in a cohort of nursing degree male students?. British journal of nursing (Mark Allen Publishing), 30(17), 1024–1030. https://doi.org/10.12968/bjon.2021.30.17.1024
7. Alt M, Lewis AM, Liu WM, Vilain E & Sanchez FJ (2014). On the validity of popular masculinity rating scales with gay men.. Archives of Sexual Behavior, 43(8), 1547-57. <https://dx.doi.org/10.1007/s10508-014-0363-6>
8. Levant, R. F., Hall, R. J., Weigold, I. K., & McCurdy, E. R. (2016). Construct validity evidence for the Male Role Norms Inventory-Short Form: A structural equation modeling approach using the bifactor model. Journal of Counseling Psychology, 63(5), 534–542. <https://doi.org/10.1037/cou0000171>
9. Pleck, J. H., Levant, R. F., & Pollack, W. S. (Eds.) (1995). A new psychology of men. New York: Basic Books.

# **Gender Self-Report (GSR)**

| Descriptive | Development (Language, Author(s), Year) | Developed in English over a 12-year period, with publication in 20232. <https://osf.io/p8dj2?view_only=c0ce41d07bca4af1b792e074d51b7ded> Developed through an iterative community-driven multi-input process (including neuropsychologists, a psychiatrist, parents, and a pediatrician), first developed in and for youth to ensure developmental appropriateness and then piloted in 2 gender clinics over 8 years and modified, after which expert feedback and equity considerations reduced it to the current version2  The item set was piloted in gender diversity clinics for youth and young adults for 8 years. Early psychometric pilot studies were conducted in samples of autistic and nonautistic youth; and cisgender and GD youth and young adults (Total *N* = 370; pilots described in the link above)2. |
| --- | --- | --- |
| Purpose | A broad use self-report tool to give voice to an individual’s gender across key elements of experience: how a person thinks of themself; how they want to be seen; how they want to be addressed; how they want to be, physically; how they want to dress/express themself; and what interests them. Designed to be accessible for youth as young as age 10 and adults, nonautistic and autistic individuals, and cisgender and GD individuals across the gender spectrum2. Designed for broad research, clinical, and services-based applications. |
| Content | 30 items that generate binary or non-binary factor scores |
| Response – Options | Always true, often true, sometimes true, never true |
| Recall Period | Within the last 6 months |
| Endorsement from Evidence-based Measures of Empowerment for Research on Gender Equality (EMERGE) | Not available on EMERGE |
| Practical | To Obtain | Freely available online: <https://osf.io/f7qeh?view_only=a0190df0087e4e98a0d0fbebe946c94a> |
| Scoring and Interpretation | 9 items indicate femaleness and 7 indicate maleness = 16 items measuring female/male continuum/binary gender diversity (FMC/BGD), the other 12 items indicate nonbinary gender diversity (NGD)  Calculator: <https://osf.io/83guk?view_only=a0190df0087e4e98a0d0fbebe946c94a> |
| Respondent Burden | Estimated response time not provided |
| Administrator Burden | Administrator burden not provided |
| Critical Appraisal Value | Strengths/Cautions/Clinical and Research Applicability | 1. a) empirical reliability coefficients (EAP-based): FMC= .87, BGD= .85, NGD= .75; Summed score reliabilities: FMC=.87, BGD= .87, NGD= .73/GD youth and young adults from USA1   b) NR  c) 0.81% of items missing/ GD youth and young adults from USA1   1. 26/30 hypotheses supported/ GD youth and young adults from USA1 2. RMSEA = .06; CFI = .99; TLI = .99/ GD youth and young adults from USA1   Strong structural and robust construct validity (26/30 hypotheses confirmed, including identity-group differences and convergent correlations1), though test–retest reliability was not reported |

**Gender Self-Report (GSR)**

All people are different. We are a mix of different interests, wishes, and feelings. Sometimes we feel pressure to look or act a certain way. We may feel pressure to act a certain way because people tell us "that is how boys/men should act" or "that is the way girls/women should feel." But we may feel differently on the inside. We want you to think about how you really feel, not just how other people expect you to be. Please be as honest as you can and answer with what is true for you.

N = Never True

S = Sometimes True

O = Often True

A = Always True

Within the last 6 months:

1. I think of myself as female.
2. I think of myself as male.
3. I think of myself as both male and female.
4. I think of myself as neither male nor female
5. I think of myself as completely different than male or female.
6. I want people to see me as female.
7. I want people to see me as male.
8. I want people to see me as both male and female.
9. I want people to see me as neither male nor female.
10. I want people to see me as a gender completely different than male or female.
11. Overall, I feel that deep down my true gender is female.
12. Overall, I feel that deep down my true gender is male.
13. Overall, I feel that deep down my true gender is both male and female.
14. Overall, I feel that deep down my true gender is neither male nor female.
15. Overall, I feel that deep down my true gender is completely different than male or female.
16. Having a female name feels or would feel right for me.
17. Having a male name feels or would feel right for me.
18. Having a gender neutral name (not clearly male or female) feels or would feel right for me.
19. Being called "she" or "her" feels or would feel right for me.
20. Being called "he" or "him" feels or would feel right for me.
21. Being called "they" or "them" or something that is gender neutral feels or would feel right for me.
22. I'm find having a penis. Or if I don't have a penis, I wish I had been born with one.
23. I'm fine having a vagina. Or if I don't have a vagina, I wish I had been born with one.
24. I'm fine having breasts. Or if I don't have breasts now, I would be fine having them in the future.
25. I'd rather have breasts than a flat chest.
26. I am upset or would be upset having a deeper (low-pitch) voice.
27. Having hair on my face (like a beard or mustache) would be very upsetting.
28. I want my voice to sound like most girls or women (higher-pitch).
29. I want my voice to sound like most boys or men (lower-pitch).
30. I want my voice to sound neither male nor female (gender neutral).

**References**

1. Strang, J. F., Wallace, G. L., Michaelson, J. J., Fischbach, A. L., Thomas, T. R., Jack, A., Shen, J., Chen, D., Freeman, A., Knauss, M., Corbett, B. A., Kenworthy, L., Tishelman, A. C., Willing, L., McQuaid, G. A., Nelson, E. E., Toomey, R. B., McGuire, J. K., Fish, J. N., Leibowitz, S. F., … Yang, J. S. (2023). The Gender Self-Report: A multidimensional gender characterization tool for gender-diverse and cisgender youth and adults. *The American psychologist*, 78(7), 886–900. <https://doi.org/10.1037/amp0001117>
2. OSF Home. GSR Development. <https://osf.io/f7qeh?view_only=a0190df0087e4e98a0d0fbebe946c94a>

# **Gendered Views of Nursing Careers Scale**

| Descriptive | Development (Language, Author(s), Year) | Developed by Orla Muldoon and Jacqueline Reilly in 2003 to document student ratings of the gender appropriateness of a range of careers1 |
| --- | --- | --- |
| Purpose | To document nursing students’ perceptions of the gender appropriateness of a range of nursing careers |
| Content | 19 nursing careers listed and rated for female/male appropriateness on a seven point Likert scale |
| Response – Options | Participants were asked to rate each career domain on a scale of 1–7 |
| Recall Period | Not applicable |
| Endorsement from Evidence-based Measures of Empowerment for Research on Gender Equality (EMERGE) | Not available to the public, list of careers assessed available as supplement to publication |
| Practical | To Obtain | Variables available as supplement to publication1 |
|  | Self-report rating of each career based on respondent’s view of whether it is more appropriate for men or women using seven point Likert scale |
| Scoring and Interpretation | A score of 1 indicates a career is viewed as appropriate for men, and a score of 7 indicates the career is appropriate for women. Careers viewed to be equally appropriate for men and women were rated as 4. Participant’s ratings are then averaged for each career to rank them in terms of which are viewed as more appropriate for men to viewed as more appropriate for women1. Since none were ranked as being more appropriate for men, the 25th and 75th percentiles of the data relating to this measure were used as cut off points to characterize careers as either Gender Neutral (GN), Female sex-typed (F), or Highly Female sex-typed (HF)1. |
| Respondent Burden | No est. time of completion given |
| Administrator Burden | Obtain mean of responses and rank careers |
| Translations | Not applicable (only available in English) |
| Critical Appraisal Value | Strengths/Cautions/Clinical and Research Applicability | 1. (a) a = 0.81/male and female nursing students residing in the UK2   b) NR  c) NR   1. NR 2. NR   Future research would benefit from longitudinal design tracing students’ career choices over time. Small number of men in the sample, although representative of male participation in nurse education, limited the number of men with psychologically feminine gender role orientation1. |

**Gendered Views of Nursing Careers Scale**

1 -------------- 2 -------------- 3 ------------- 4 --------------- 5 -------------- 6 -------------- 7

Appropriate for men Gender neutral Appropriate for women

List of nursing specialties:

1. Midwifery
2. School nurse
3. District nurse
4. Health visitor
5. Pediatrics
6. Practice nurse
7. Palliative care
8. Oncology
9. Critical care
10. Nurse teacher
11. Elder care
12. General medical
13. Nurse manager
14. General surgical
15. Nurse consultant
16. Theatre
17. Learning disability
18. Accident and emergency
19. Mental health

**References**

1. Muldoon, O.T. and Reilly, J. (2003), Career choice in nursing students: gendered constructs as psychological barriers. Journal of Advanced Nursing, 43: 93-100. <https://doi.org/10.1046/j.1365-2648.2003.02676.x>
2. McLaughlin, K., Muldoon, O. T., & Moutray, M. (2010). Gender, gender roles and completion of nursing education: A longitudinal study. *Nurse Education Today*, *30*(4), 303–307. https://doi.org/10.1016/j.nedt.2009.08.005

# **Gender-Equitable Men (GEM) Scale**

| Descriptive | Development (Language, Author(s), Year) | Developed by Julie Pulerwitz and Gary Barker in 2008 based on past literature as well as a survey administered to a household sample of 742 men (223 of which were young men aged 15-24), to study gender norms among men in Rio de Janeiro, Brazil2. The scale was further developed into a more widely used version in 2017 by Lung Vu and colleagues6 |
| --- | --- | --- |
| Purpose | To measure gender equity2 |
| Content | A 24-item scale made up of two subscales measuring men’s support for inequitable gender norms (17-Item Inequitable Gender Norms subscale) and equitable gender norms (7-Item Equitable Gender Norms subscale)1 |
| Response – Options | Respondents rate themselves on a 3-point Likert scale (*agree, partially agree,* or *do not agree*) based on the accuracy of the given statement (e.g., It is the man who decides what type of sex to have)2 |
| Recall Period | Not applicable |
| Endorsement from Evidence-based Measures of Empowerment for Research on Gender Equality (EMERGE) | Not applicable |
| Practical | To Obtain | The original scale and its most widely used version are available to the public:<https://genderhealthdata.org/wp-content/uploads/gravity_forms/scale-repository-PDFs/Gender-Equitable-Men-GEM-Scale.pdf> |
|  | Respondents complete two subscales by rating the degree to which they support inequitable and equitable gender norms. A 3-point Likert scale1 is used for both the widely used and original GEM scale |
| Scoring and Interpretation | Each item is scored such that the least-equitable response receives one point, the moderately equitable response gives two points, and three points are given for the most-equitable response. Responses to items are summed for each subscale separately, then the two scores are combined. A higher score was equated to greater support for gender-equitable norms2 |
| Respondent Burden | Relatively low; respondents were able to complete the questionnaire in their homes or in spaces near their homes, providing them a sense of privacy2 |
| Administrator Burden | Relatively low; scoring can be performed manually or via software |
| Translations | English, Portuguese, Spanish, and Hindi2. Importantly, the GEM scale is not the same in every country—items have been added to/omitted from the scale for cultural specificity4 |
| Critical Appraisal Value | Strengths/Cautions/Clinical and Research Applicability | 1. (a) λ = 0.88/ adults ages 18-49 in rural South Africa8; α= 0.81/Brazilian men ages 15-243; Θ = 0.87, α = 0.78/ M and F 15-24 yrs living in Uganda7   (b) NR  (c) std. error ranges on GEM scale score assoc w HIV risk factors: 0.19 – 0.45/ M and F 15-24 yrs living in Uganda7   1. Neg assoc btwn supporting gender equitable norms and violence, pos assoc btwn supporting gender equitable norms and education, contraceptive use/ Brazilian men ages 15-243 2. RMSEA = .0031; CFI = .97, TLI = .96 /M and F 15-24 yrs living in Uganda7   Showed high internal consistency, but factor analysis did not confirm original structure, instead supporting a reorganized multi-factor model that improves validity and interpretability/geriatric population1 |

**The Gender-Equitable Men (GEM) Scale (Original)**1, 2

Scoring Instructions: Responses are scored as follows: Agree =1; Partially agree = 2, Do not agree = 3

* = Reverse coded (Agree = 3, Partially agree = 2, Do not agree = 1)

Factor 1: Inequitable Gender Norms

1. It is the man who decides what type of sex to have*
2. A woman’s most important role is to take care of her home and cook for her family*
3. Men need sex more than women do*
4. You don’t talk about sex, you just do it*
5. Women who carry condoms on them are “easy”*
6. A man needs other women, even if things with his wife are fine*
7. There are times when a woman deserves to be beaten*
8. Changing diapers, giving the kids a bath, and feeding the kids are the mother’s responsibility*
9. It is a woman’s responsibility to avoid getting pregnant*
10. A man should have the final word about decisions in his home*
11. Men are always ready to have sex*
12. A woman should tolerate violence in order to keep her family together*
13. If a woman cheats on a man, it is okay for him to hit her*
14. If someone insults me, I will defend my reputation, with force if I have to*
15. I would be outraged if my wife asked me to use a condom*
16. It is okay for a man to hit his wife if she won’t have sex with him*
17. I would never have a gay friend*

Factor 2: Equitable Gender Norms

1. A couple should decide together if they want to have children
2. In my opinion, a woman can suggest using condoms just like a man can
3. If a guy gets a woman pregnant, the child is the responsibility of both
4. A man should know what his partner likes during sex
5. It is important that a father is present in the lives of his children, even if he is no longer with the mother
6. A man and a woman should decide together what type of contraceptive to use
7. It is important to have a male friend that you can talk about your problems with

**Gender Equitable Men (GEM) Scale (Widely Used Version)**1

Scoring Instructions: Responses are scored as follows: Agree =1; Partially agree = 2, Do not agree = 3

1. There are times a woman deserves to be beaten
2. A woman should tolerate violence in order to keep her family together
3. If someone insults a man he should defend his reputation with force if he has to
4. It is ok for a man to hit his wife if she won’t have sex with him
5. A man using violence against his wife is a private matter that shouldn’t be discussed outside the couple
6. It is alright for a man to beat his wife if she is unfaithful
7. It is a woman’s responsibility to avoid getting pregnant
8. A man should be outraged if his wife asks him to use a condom
9. Women who carry condoms on them are easy
10. Only when a woman has a child is she a real woman
11. A real man produces a male child
12. It disgusts me when I see a man acting like a woman
13. A woman should not initiate sex
14. You don’t talk about sex, you just do it
15. A woman who has sex before she marries does not deserve respect
16. Men need sex more than women do
17. Men are always ready to have sex
18. A man needs other women, even if things with his wife are fine
19. It is the man who decides what type of sex to have
20. Giving the kids a bath and feeding the kids are the mother’s responsibility
21. A woman’s most important role is to take care of her home and cook for her family
22. A man should have the final word on decisions in his home
23. The husband should decide what major household items to buy
24. A woman should obey her husband in all things

**References**

1. Dubé, F., Rousseau, J., Nadeau, S., Kaegi, C., & Boudreault, R. (2010). Factorial validation of a walking safety scale (GEM scale) for the geriatric population. Physiotherapy Theory and Practice, 26(3), 173–183. <https://doi.org/10.3109/09593980902750725>
2. Gender Equitable Men Scale (GEM Scale). Gender Health Data. <https://genderhealthdata.org/wp-content/uploads/gravity_forms/scale-repository-PDFs/Gender-Equitable-Men-GEM-Scale.pdf>. Accessed February 5, 2025.
3. Pulerwitz, J., & Barker, G. (2008). Measuring Attitudes toward Gender Norms among Young Men in Brazil: Development and Psychometric Evaluation of the GEM Scale. Men and Masculinities, 10(3), 322-338. <https://doi.org/10.1177/1097184X06298778>
4. Scott J, Averbach S, Modest AM, Hacker MR, Cornish S, Spencer D, Parmar P (2013). An assessment of gender inequitable norms and gender-based violence in south sudan: a community-based participatory research approach.. Conflict & Health [Electronic Resource], 7(1), 4. <https://dx.doi.org/10.1186/1752-1505-7-4>
5. Singh, A., Verma, R., & Barker, G. (2013). Measuring Gender Attitude: Using Gender-Equitable Men Scale (GEMS) in Various Socio-Cultural Settings. UN Women.
6. Wesson, P.D., Lippman, S.A., Neilands, T.B. et al. Evaluating the Validity and Reliability of the Gender Equitable Men’s Scale Using a Longitudinal Cohort of Adolescent Girls and Young Women in South Africa. AIDS Behav 26, 775–785 (2022). <https://doi.org/10.1007/s10461-021-03436-0>
7. Vu L, Pulerwitz J, Burnett-Zieman B, Banura C, Okal J, Yam E. Inequitable Gender Norms From Early Adolescence to Young Adulthood in Uganda: Tool Validation and Differences Across Age Groups. J Adolesc Health. 2017 Feb;60(2S2): S15-S21. doi: 10.1016/j.jadohealth.2016.09.027. PMID: 28109335.
8. Pulerwitz, J., Gottert, A., Kahn, K. et al. Gender Norms and HIV Testing/Treatment Uptake: Evidence from a Large Population-Based Sample in South Africa. AIDS Behav 23 (Suppl 2), 162–171 (2019). <https://doi.org/10.1007/s10461-019-02603-8>

# **GENESIS-PRAXY Gender Index**

| Descriptive | Development (Language, Author(s), Year) | Developed in 2015 by Roxanne Pelletier, Blain Ditto, and Louise Pilote using data from GENESIS-PRAXY, a prospective, multicenter study aimed at studying the differences related to sex and gender in terms of clinical presentation, prognosis, and healthcare use for premature acute coronary syndrome (ACS) patients aged 18-552. Participants were recruited between January 2009 and April 20133. The index itself was developed to investigate the intersections between gender, sex, and cardiovascular risk factors for premature ACS patient3 |
| --- | --- | --- |
| Purpose | To measure gender and calculate gender scores in patients hospitalized for premature ACS3 |
| Content | Data on gender identification, socio-economic standing, social roles and psychosocial questions measuring emotions4 from the GENESIS-PRAXY study, which researchers determined to be gender-related variables3. The logistic regression coefficient estimates of variables associated with sex were used to calculate the gender score3 |
| Response – Options | Not applicable |
| Recall Period | Not applicable |
| Endorsement from Evidence-based Measures of Empowerment for Research on Gender Equality (EMERGE) | Endorsed as a ‘novel gender index’ by the Canadian Institutes of Health Research (CIHR): <https://cihr-irsc.gc.ca/e/51310.html> |
| Practical | To Obtain | Not directly available for free download, available through academic or institutional access |
|  | Not applicable. Index needs to be created every time based on available data for the population |
| Scoring and Interpretation | Gender scores were applied to gender-related variables from GENESIS-PRAXY, representing the probability from 0% to 100% of the patient in the sample being a “woman”3:   - Gender score closer to 0 = masculine characteristics - Gender score in middle region (~50) = androgyny (similar levels of both feminine and masculine characteristics) - Gender score closer to 100 = feminine characteristics |
| Respondent Burden | Not applicable |
| Administrator Burden | Not applicable |
| Translations | Not applicable |
| Critical Appraisal Value | Strengths/Cautions/Clinical and Research Applicability | 1. (a) NR   (b) NR  (c) NR   1. Spearman correlation btwn gender score and sex r= 0.62, c statistic = 0.9 / ACS pts =<55 yrs3 2. NR   Selection of variables representing the four aspects of gender is arbitrary. Biological sex used as dependent variable in logistic regression analyses/ ACS pts =<55 yrs3 |

**References**

1. Kumar Chaudhary, Anil, and Glenn D. Israel. 2016. “The Savvy Survey #6d: Constructing Indices for a Questionnaire: AEC399 PD069, 12 2015”. EDIS 2016 (1). Gainesville, FL:6. https://doi.org/10.32473/edis-pd069-2015.
2. L. Pilote, I. Karp. GENESIS-PRAXY (GENdEr and Sex determInantS of cardiovascular disease: From bench to beyond-Premature Acute Coronary SYndrome). Am Heart J, 163 (2012), pp. 741-746.
3. Pelletier R, Ditto B, Pilote L. A composite measure of gender and its association with risk factors in patients with premature acute coronary syndrome. Psychosom Med. 2015 Jun;77(5):517-26. doi: 10.1097/PSY.0000000000000186. PMID: 25984818.
4. SGBA+ Health Policy-Research Partnerships. (2020). Canadian Institutes of Health Research (CIHR). <https://cihr-irsc.gc.ca/e/51192.html>. Accessed March 31, 2025.

# **Macho Scale**

| Descriptive | Development (Language, Author(s), Year) | Developed by Patricia Anderson in 2012 among men 18-59 years old, who would likely be fathers, in Jamaica. Drafted a 42-item instrument to examine attitudes of special interest related to male dominance and authority, physical dominance of women, virility and sexual freedom, right to have children outside current union, restrictive emotionality and toughness, aggression, homophobia, and gender-linked domestic roles. During the pilot test, it became clear that attitudes towards aggression and emotionality were not being usefully distinguished and so many of the questions in these areas were omitted. Following two rounds of factor analysis, a 13-item scale was selected1. |
| --- | --- | --- |
| Purpose | A measure of masculine identity and gender relations in the Caribbean. |
| Content | 13 items that are distributed into 5 factors: dominance, virility including homophobia, aggression, restrictive emotionality, and need to have children. |
| Response – Options | Likert-type scale from 1 to 5: agree strongly, agree, uncertain, disagree, disagree strongly2 |
| Recall Period | Not applicable |
| Endorsement from Evidence-based Measures of Empowerment for Research on Gender Equality (EMERGE) | Scale items available through publication |
| Practical | To Obtain | Supplement to publication |
|  | Self-report questionnaire |
| Scoring and Interpretation | Score range is from 13 to 65 with higher values indicating stronger attachment to masculine attitudes. Scores classified as “high,” “moderate,” and “low” by dividing the frequency distribution of the sample into tertiles.2 |
| Respondent Burden | Est. time to complete not given, self-report questionnaire |
| Administrator Burden | Adding up and classifying scores by sample distribution |
| Translations | Not applicable; only available in English |
| Critical Appraisal Value | Strengths/Cautions/Clinical and Research Applicability | 1. a)  = 0.74/Outpatient men aged 19-54 residing in West Jamaica2;  = 0.816,  = 0.75 (Dominance and Virility subscale),  = 0.72 (Primordial Need to Have Children)/ Afro-Caribbean men residing in Jamaican communities1   b) NR  c) NR   1. Corr btwn subscales, r = 0.531/ Afro-Caribbean men residing in Jamaican communities1 2. NR   Developed among Jamaican men 18-59 years old based on common beliefs about masculinity held there, which might limit applicability. |

**Macho Scale**

1 ------------------- 2 ------------------- 3 ------------------- 4 -------------------- 5

Agree strongly Agree Uncertain Disagree Disagree strongly

1. A man’s nature is stronger than a woman’s so it is okay for him to have more than one woman
2. Is it is okay for a man to have outside children if he looks after them
3. A man has the right to physically discipline his partner if she steps out of line
4. If a man has a lot of girlfriends, he is seen as more of a man than if he sticks with one woman
5. A man should never let a woman know that he really loves her
6. Even if the housekeeping money is short, a man is allowed to buy a drink for his friends
7. A woman does not have the right to refuse to have sex with her partner
8. Even if a man helps the woman with the housework, he should not wash the clothes for the family
9. If I did not have children, I would feel jealous of other men who have
10. I would not feel like a man if I did not have children
11. I would never marry a woman who could not have children
12. If my partner could not have children, I would seek to get children elsewhere
13. A man can tell when a child is really his

**References**

1. Anderson, P. (2012). Measuring masculinity in an afro-caribbean context.*Social and Economic Studies, 61*(1), 49-93. Retrieved from <http://myaccess.library.utoronto.ca/login?qurl=https%3A%2F%2Fwww.proquest.com%2Fscholarly-journals%2Fmeasuring-masculinity-afro-caribbean-context%2Fdocview%2F1443469156%2Fse-2%3Faccountid%3D14771>
2. Walcott MM, Ehiri J, Kempf MC, et al. Gender Norms and Family Planning Practices Among Men in Western Jamaica. American Journal of Men’s Health. 2014;9(4):307-316. doi:10.1177/1557988314543792

# **Male Role Attitudes Scale (MRAS)**

| Descriptive | Development (Language, Author(s), Year) | Data from the National Survey of Adolescent Males that interviewed 1880 males aged 15-19 between April and November 1988 was assessed for attitudes towards male roles in 4 areas, where respondents had indicated their agreement with these measures in the NSAM1. |
| --- | --- | --- |
| Purpose | To assess endorsement of traditional masculine ideology2 |
| Content | 8 items measuring attitudes towards status, toughness, anti-femininity, and sex1 |
| Response – Options | 4-point Likert scale (agree a lot, agree a little, disagree a little, disagree a lot) |
| Recall Period | Not applicable |
| Endorsement from Evidence-based Measures of Empowerment for Research on Gender Equality (EMERGE) | Developed using data from the National Survey of Adolescent Males, items available through publication1 |
| Practical | To Obtain | Items and scale available through publication |
|  | Self-report survey |
| Scoring and Interpretation | Higher scores are indicative of a greater endorsement of traditional masculine ideology |
| Respondent Burden | No est. time to complete given, only 8 items |
| Administrator Burden | Calculating total score |
| Translations | Not applicable, only available in English |
| Critical Appraisal Value | Strengths/Cautions/Clinical and Research Applicability | 1. (a) α = 0.67/UK adult males2   (b) NR  (c) Self-report measures susceptible to social desirability, lying, and fatigue/ UK adult males2   1. Intercorr btwn 0.45-0.55 btwn MRAS and ATWS/college students1 2. NR   Because MRAS is a multi-item scale, it may be a more reliable indicator of attitudes toward male roles (i.e., a higher proportion of observed variance is interpretable as "true" as opposed to error variance) than are the single item measures of attitudes toward women and attitudes toward gender roles and relationships1. |

**Male Role Attitudes Scale (MRAS)**

1 -------------------------- 2 -------------------------- 3 ------------------------------ 4

Agree a lot Agree a little Disagree a little Disagree a lot

1. It is essential for a man to get respect from others.

2. A man always deserves the respect of his wife and children.

3. I admire a guy who is totally sure of himself.

4. A guy will lose respect if he talks about his problems.

5. A young man should be physically tough, even if he's not big.

6. It bothers me when a guy acts like a girl.

7. I don't think a husband should have to do housework.

8. Men are always ready for sex.

**References**

1. Pleck, J.H., Sonenstein, F.L. & Ku, L.C. Attitudes toward male roles among adolescent males: A discriminant validity analysis. *Sex Roles* 30, 481–501 (1994). <https://doi.org/10.1007/BF01420798>
2. Sullivan, L., Camic, P.M. and Brown, J.S.L. (2015), Masculinity, alexithymia, and fear of intimacy as predictors of UK men's attitudes towards seeking professional psychological help. Br J Health Psychol, 20: 194-211. <https://doi.org/10.1111/bjhp.12089>

# **Masculine Gender Role Discrepancy Stress Scale**

| Descriptive | Development (Language, Author(s), Year) | Developed in 2015 from a survey of 600 men aged 18-50 by Dennis E. Reidy and colleagues to assess the impacts of gender discrepancy stress on health behaviours2 |
| --- | --- | --- |
| Purpose | To assess men’s experience with gender role discrepancy stress2 |
| Content | Composed of two subscales: a 5-item Gender Role Discrepancy scale measuring respondents’ experience of gender role discrepancy, and a 5-item Discrepancy Stress scale evaluating the distress emerging from this discrepancy. The scales are both measured on a 7-point Likert-like scale1-3 |
| Response – Options | Respondents rate their alignment with 10 statements related to gender role discrepancy and the associated discrepancy stress based on their own experiences (e.g., I am less masculine than the average guy”)2 |
| Recall Period | Not applicable |
| Endorsement from Evidence-based Measures of Empowerment for Research on Gender Equality (EMERGE) | The two subscales are rated on Evidence-based Measures of Empowerment for Research on Gender Equality (EMERGE):   - Discrepancy Stress Scale: medium psychometric score, high ease of use score4 - Masculine Gender Role Stress Scale: high psychometric score5 |
| Practical | To Obtain | Available as a supplement to publication2: <https://pmc.ncbi.nlm.nih.gov/articles/PMC6816038/> |
|  | Respondents rate the degree to which two subscales, each composed of 5 statements realting to masculine gender role discrepancy and discrepancy stress, are representative of them using a Likert scale ranging from 1 to 7 (i.e., 1 = Strongly Agree and 7 = Strongly Disagree)1,3 |
| Scoring and Interpretation | Items are individually self-rated by the respondent and a mean score is taken, with higher scores suggesting more prominent gender role discrepancy and discrepancy stress3. Alternatively, a summation of the participant’s responses for each question can be taken to generate a score for each subscale1 |
| Respondent Burden | 30 minutes to complete2 |
| Administrator Burden | Relatively low; scoring can be completed manually or via software |
| Translations | Not applicable (only available in English) |
| Critical Appraisal Value | Strengths/Cautions/Clinical and Research Applicability | 1. a) Discrepancy subscale a = 0.91, Discrepancy Stress subscale a = 0.86/US men aged 18-501   b) NR  c) removed all respondents who were more than 2.5 SDs from mean time to complete the survey/ US men aged 18-502   1. Two subscales found to be positively correlated, r = 0.61, KMO=0.91/US men aged 18-501 2. Eigenvalue analysis indicated three factors with values greater than one explaining approximately 56 % of the variance/US men aged 18-502   Self-report measures may not accurately reflect participants’ real-world behaviours and prevalence2. Large portion of sample was homogenous both ethnically and in terms of sexual orientation2, limiting generalizability of findings and applicability to diverse communities2. |

**Masculine Gender Role Discrepancy Stress Scale**2

Directions: Please indicate your feelings about each statement by circling one number between 1 (Strongly Agree) and **7** (Strongly Disagree).

1 -------------- 2 -------------- 3 ------------- 4 --------------- 5 -------------- 6 -------------- 7

Strongly agree Strongly disagree

1. I am less masculine than the average guy.
2. Compared to my guy friends, I am not very masculine.
3. I wish I was more “manly.”
4. Most women I know would say that I am not as masculine as my friends.
5. I wish I was interested in things that other guys find interesting.
6. Most women would consider me to be less masculine than the typical guy.
7. I worry that people judge me because I am not like the typical man.
8. Most guys would think I am not very masculine compared to them.
9. Sometimes I worry about my masculinity.
10. I worry that women find me less attractive because I’m not as macho as other guys.

Items in the Gender Role Discrepancy Scale: 1, 2, 4, 6, and 8

Items in the Discrepancy Stress Scale: 3, 5, 7, 9, and 10

**References**

1. Reidy DE, Berke DS, Gentile B, Zeichner A. Man enough? Masculine discrepancy stress and intimate partner violence. Pers Individ Dif. 2014 Oct;68:160-164. doi: 10.1016/j.paid.2014.04.021. PMID: 29593368; PMCID: PMC5868426.
2. Reidy DE, Brookmeyer KA, Gentile B, Berke DS, Zeichner A. Gender Role Discrepancy Stress, High-Risk Sexual Behavior, and Sexually Transmitted Disease. Arch Sex Behav. 2016 Feb;45(2):459-65. doi: 10.1007/s10508-014-0413-0. Epub 2015 Jan 7. PMID: 25564036; PMCID: PMC6816038.
3. Sileo KM, Luttinen R, Muñoz S, Hill TD. Gender Role Discrepancy Stress and COVID-19 Prevention Behaviors Among Men in the United States. Am J Health Promot. 2023 Jul;37(6):766-777. doi: 10.1177/08901171231152140. Epub 2023 Jan 17. PMID: 36648009; PMCID: PMC9852979.
4. Discrepancy Stress Scale. (2023). EMERGE. <https://emerge.ucsd.edu/r_uvzb1ediiqvv4bz2/>. Accessed March 31, 2025.
5. Masculine Gender Role Stress Scale. (2023). EMERGE. <https://emerge.ucsd.edu/r_vjutxpqfaoowvmv/>. Accessed March 31, 2025.

# **Masculine Gender-Score**

| Descriptive | Development (Language, Author(s), Year) | Developed by Vader et al (2023) as a one-dimensional masculine gender-score. They decided to base this score on aspects of everyday life that are seen as the traditional norm for men such as being the main earner in the household, doing odd jobs and engaging in masculine typed sports. Thirteen variables that were connected to the 4 domains of gender were selected for the scale1. |
| --- | --- | --- |
| Purpose | A one-dimensional masculine gender score assessing masculinity over 4 domains: work & education, informal care, lifestyle and emotions1. |
| Content | Work and education: division of paid work between respondent and partner, physical intensity of work, and educational level compared to the partner.  Informal care: time spent doing household chores, time spent on odd jobs, and taking care of sick people1.  Lifestyle: Physical intensity of or specific type of sports, smoking cigars, and type of alcohol consumption  Emotions: The reporting of being limited in work or activities due to emotional problems, ‘’experiencing a feeling of nervousness’’, ‘’feeling energetic and vibrant’’, and ‘’feeling exhausted and tired”1 |
| Response – Options | Self-report based on 3 categories given for each variable (see below) |
| Recall Period | Not applicable |
| Endorsement from Evidence-based Measures of Empowerment for Research on Gender Equality (EMERGE) | The variables chosen are comparable to the gender related variables used in similar studies (Lacasse et al., 2020; Smith and Koehoorn, 2016; Nauman et al., 2021; Levinsson et al., 2022) and cover the four gender dimensions proposed by Johnson (Johnson et al., 2008). Cross-sectional data from the Doetinchem Cohort Study (DCS) were used. |
| Practical | To Obtain | Not directly available for free download, variables available in publication through academic or institutional access |
|  | Respondents select from 3 categories per variable based on which is most representative of them |
| Scoring and Interpretation | Items are individually self-reported by the respondent and a score ranging from 0-2 is assigned to each response, the gender-score was calculated by summing all variables (range 0–19). A higher score refers to an individual presenting more masculine connotated aspects of everyday life. |
| Respondent Burden | No est. time to complete given |
| Administrator Burden | Self-report survey, not freely available online except as described in publication results |
| Translations | Not applicable (only available in English) |
| Critical Appraisal Value | Strengths/Cautions/Clinical and Research Applicability | 1. a) NR   b) NR  c) use of self-reported measures might have generated biased information since it requires a certain level of literacy1   1. Total score on avg higher in men (M = 12.2, SD = 2.5) than women (M = 9.1, SD = 2.4) / adults 40-80 yrs residing in the Netherlands1 2. NR   The Masculine Gender-Score used masculine connotated aspects of everyday life that are not necessarily feminine-typed aspects1. A mainly Caucasian population of middle and old age, and residing within a specific - not highly urbanized - region was used1. In addition, those with severe diseases and worse health are under-represented in such studies1. |

**Work and Education**

Division of paid work compared with partner:

- Partner most responsible for paid work
- Equal division in paid work
- Respondent most responsible for paid work/no partner

Physical intensity of paid work

- Light or no intense work (sedentary or standing work)
- Moderate intensity (often carrying moderately heavy weights)
- Heavy intensity (often carrying heavy weights)

Education level compared with partner

- Respondent has a lower level than partner
- Same level of education or no partner
- Respondent has a higher level than partner

**Informal Care**

Average hours spent weekly on household chores

- >= 10 h
- 5–10 h
- < 5 h

Hours spent weekly doing odd jobs

- < 5 h
- 5-10 h
- >=10 h

Taking care of sick people (other than partner)

- (almost) never
- Couple of times every month
- Daily, weekly

**Lifestyle**

Smoking cigars or pipe

- Yes
- No

Type of alcoholic beverage

- Not or almost never drinking alcohol
- Wine and/or port sherry vermouth
- Beer and/or liquor

Physical intensity of sport (excl. work)

- Not exercising or light intensity
- Moderate
- Heavy or masculine type of sports

**Emotions**

Limited in work/activities due to emotional problems

- Yes
- No

Feeling of nervousness

- Often, mostly, or constantly
- Sometimes, seldom, or never

Feeling energetic and vibrant

- Often, mostly, or constantly
- Sometimes, seldom, or never

Feeling exhausted and tired

- Often, mostly, or constantly
- Sometimes, seldom, or never

**References**

1. Vader, S. S., Lewis, S. M., Verdonk, P., Verschuren, W. M. M., & Picavet, H. S. J. (2023). Masculine gender affects sex differences in the prevalence of chronic health problems - The Doetinchem Cohort Study. Preventive medicine reports, 33, 102202. <https://doi.org/10.1016/j.pmedr.2023.102202>

# **Masculine Measure**

| Descriptive | Development (Language, Author(s), Year) | Developed using masculine norms identified in qualitative research from 3116 men in east Zimbabwe in 2012-13 by Rhead et al |
| --- | --- | --- |
| Purpose | A quantitative measurement to establish the individual-level determinants of masculine norms and their implications for HIV prevention and treatment programme |
| Content | A series of 16 masculinity measure items under 4 areas (toughness, antifemininity, sex drive, social status) |
| Response – Options | Respondents were asked if they agree or disagree with each statement |
| Recall Period | Not applicable |
| Endorsement from Evidence-based Measures of Empowerment for Research on Gender Equality (EMERGE) | Data for this study were taken from the Manicaland HIV/STD Prevention Project (Manicaland study) [27]. The Manicaland study is an open-cohort general-population survey, which examines the dynamics of HIV transmission and its impact in eight sites in Manicaland province in eastern Zimbabwe |
| Practical | To Obtain | Available as supplement to publication |
|  | Respondents indicate whether they agree or disagree with each statement |
| Scoring and Interpretation | Items are individually self-rated by respondent and are used to produce four factors representing each masculine social norm (‘toughness,’ ‘antifemininity,’ ‘sex drive’ and ‘social status’). Each of these factors exists as a continuous variable, which reflects the extent to which our survey participants endorse that particular masculine norm (i.e. participants who strongly endorse a particular norm will have a high score for the relevant factor) |
| Respondent Burden | Relatively low, 16 statements to agree/disagree with |
| Administrator Burden | Questions were developed for masculine norms identified from specific cohort data |
| Translations | N/A |
| Critical Appraisal Value | Strengths/Cautions/Clinical and Research Applicability | 1. a) NR   b) NR  c) NR   1. NR 2. CFI: 0.816, TLI: 0.775, RMSEA: 0.065/ men aged 15-54 years from east Zimbabwe1 3. Statistics were determined to be a borderline good fit1. Response scale only had 2 options (agree, disagree)1. Only applicable to men 15-54 years old from east Zimbabwe1 |

Masculine Measure


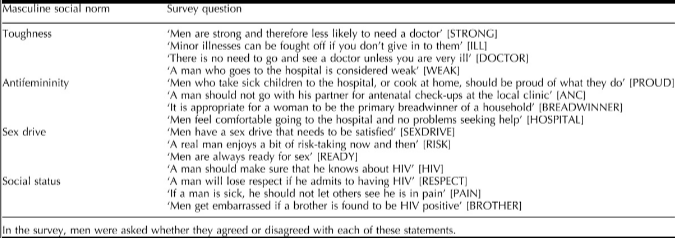


**References**

1. Rhead, Rebeccaa,b; Skovdal, Mortenc; Takaruza, Albertd; Maswera, Rufurwokudad; Nyamukapa, Constancea,d; Gregson, Simona,d. The multidimensionality of masculine norms in east Zimbabwe: implications for HIV prevention, testing and treatment. AIDS 33(3):p 537-546, March 1, 2019. | DOI: 10.1097/QAD.0000000000002041

# **Male Role Norms Inventory (MRNI**)

| Descriptive | Development (Language, Author(s), Year) | Developed in 1992 by Levant et al. in English.1 In 2007, the authors revised the inventory into the Male Role Norms Inventory-Revised (MRNI-R)2 and, in 2013, they developed the Male Role Norms Inventory-Short Form (MRNI-SF)3 |
| --- | --- | --- |
| Purpose | Measure traditional masculinity ideology2 |
| Content | Originally, a 58-item instrument with 7 subscales measuring norms associated with traditional masculinity:   1. Avoidance of Femininity 2. Homophobia 3. Self-Reliance 4. Aggression 5. Achievement/Status 6. Attitudes Toward Sex 7. Restrictive Emotionality1   The revised version contains 49 items divided into 7 subscales:   1. Avoidance of Femininity 2. Negativity toward Sexual Minorities 3. Self-reliance through Mechanical Skills 4. Toughness 5. Dominance 6. Importance of Sex 7. Restrictive Emotionality   The most recently developed short form version contains 21 items divided into 7 subscales:   1. Restrictive Emotionality, RE 2. Self-Reliance through Mechanical Skills, SR 3. Negativity toward Sexual Minorities, NT 4. Avoidance of Femininity, AF 5. Importance of Sex, IS 6. Dominance, Do 7. Toughness, T |
| Response – Options | A 7-point Likert Scale, ranging from “strongly disagree” (1) to “strongly agree” (7) |
| Recall Period | Not applicable |
| Endorsement from Evidence-based Measures of Empowerment for Research on Gender Equality (EMERGE) | All 3 versions of the instrument are rated on EMERGE:   - MRNI: high psychometric score, high ease of use score4 - MRNI-R: medium psychometric score, high ease of use score5 - MRNI-SF: medium psychometric score, medium ease of use score6 |
| Practical | To Obtain | The three versions of the tool are freely available online:   - MRNI: <https://emerge.ucsd.edu/r_qajejmhjgwf63f3/> - MRNI-R: <https://emerge.ucsd.edu/r_ahdu4epclngxf7x/> - MRNI-SF: <https://emerge.ucsd.edu/r_stlqrhb6iyowh4l/> |
| Scoring and Interpretation | A mean score is taken for each subscale, and an overall mean score is then calculated encompassing all the subscale averages.3 A higher score suggests greater endorsement of traditional masculinity3 |
| Respondent Burden | The questionnaire could be considered somewhat lengthy, but has an overall a relatively low respondent burden |
| Administrator Burden | Relatively low; scoring can be performed manually or via software |
| Critical Appraisal Value | Strengths/Cautions/Clinical and Research Applicability | 1. (a) total α = .94/ community and college men ages 18-727; α = .96/ USA undergraduates 18-51 yrs2   (b) NR  (c) NR   1. r = −.66 with MRAS (p < .001), r = .70 with CMNI-46 general (p < .001), r = .50 with GRCS-SF higher-order (p < .001), r = .13 with PAQ-M, r = .42 with NMAS/USA undergraduates 18-51 yrs2; corr of factors with total scale: r=0.59-0.90/men from USA undergraduates 18-51 yrs, r=0.64-0.90/women from USA undergraduates 18-51 yrs2 2. CFI = .94, TLI = .93, RMSEA = .033 [.031, .035]/ community and college men ages 18-727 3. Construct validity supported using SEM with a bifactor model in a diverse male sample, showing strong latent correlations with external masculinity measures, concurrent validity for several specific factors (NTSM, IS, RE, T), but not for Dominance. |

**Male Role Norms Inventory Short Form (MRNI-SF)**

**Restrictive Emotionality (RE)**

1. A man should never admit when others hurt his feelings
2. Men should be detached in emotionally charged situations
3. Men should not be too quick to tell others that they care about them

**Self-Reliance through Mechanical Skills (SR)**

1. Men should have home improvement skills
2. Men should be able to fix most things around the house
3. A man should know how to repair his car if it should break down

**Negativity toward Sexual Minorities (NT)**

1. Homosexuals should never marry
2. All homosexual bars should be closed down
3. Homosexuals should never kiss in public

**Avoidance of Femininity (AF)**

1. Men should watch football games instead of soap operas
2. A man should prefer watching action movies to reading romantic novels
3. Boys should prefer to play with trucks rather than dolls

**Importance of Sex (IS)**

1. Men should always like to have sex
2. A man should not turn down sex
3. A man should always be ready for sex

**Dominance (Do)**

1. The President of the US should always be men
2. Men should be the leader in any group
3. A man should always be the boss

**Toughness (T)**

1. It is important for a man to take risks, even if he might get hurt
2. When the going gets tough, men should get tough
3. I think a young man should try to be physically tough, even if he’s not big

References

1. Levant, R. F., Hirsch, L. S., Celentano, E., Cozza, T. M., Hill, S., MacEachern, M., & Schnedeker, J. (1992). The male role: An investigation of contemporary norms. Journal of Mental Health Counseling, 14(3), 325–337.
2. Levant, R. F., Rankin, T. J., Williams, C. M., Hasan, N. T., & Smalley, K. B. (2010). Evaluation of the factor structure and construct validity of scores on the Male Role Norms Inventory—Revised (MRNI-R). Psychology of Men & Masculinity, 11(1), 25–37. <https://doi.org/10.1037/a0017637>
3. Levant, R. F., Hall, R. J., & Rankin, T. J. (2013). Male Role Norms Inventory–Short Form (MRNI-SF): Development, confirmatory factor analytic investigation of structure, and measurement invariance across gender. Journal of Counseling Psychology, 60(2), 228–238. https://doi.org/10.1037/a0031545 4.
4. Male Role Norms Inventory (MRNI). EMERGE. https://emerge.ucsd.edu/r_qajejmhjgwf63f3/. Accessed March 31, 2025.
5. Male Role Norms Inventory Revised (MRNI-R). EMERGE. https://emerge.ucsd.edu/r_ahdu4epclngxf7x/. Accessed March 31, 2025.
6. Male Role Norms Inventory Short Form (MRNI-SF). EMERGE. https://emerge.ucsd.edu/r_stlqrhb6iyowh4l/. Accessed March 31, 2025.
7. Levant, R. F., Hall, R. J., Weigold, I. K., & McCurdy, E. R. (2016). Construct validity evidence for the Male Role Norms Inventory-Short Form: A structural equation modeling approach using the bifactor model. Journal of Counseling Psychology, 63(5), 534–542. <https://doi.org/10.1037/cou0000171>
8. Levant, R. F., Hirsch, L. S., Celentano, E., Cozza, T. M., et al. (1992). The male role: An investigation of contemporary norms. Journal of Mental Health Counseling, 14(3), 325–337.
9. McDermott RC, Levant RF, Hammer JH, Hall RJ, McKelvey DK & Jones Z (2017). Further examination of the factor structure of the male role norms inventory-short form (mrni-sf): measurement considerations for women, men of color, and gay men.. Journal of Counseling Psychology, 64(6), 724-738. <https://dx.doi.org/10.1037/cou0000225>

# **Masculinity in Chronic Disease Inventory (MCD-I)**

| Descriptive | Development (Language, Author(s), Year) | Suzanne K. Chambers and colleagues developed MCD-I in 2016 to capture the internalized masculine beliefs in the context of chronic disease research. A specific qualitative examination was undertaken in order to develop the tool, using existing data of men’s self-reported experiences with prostate cancer. A 5-factor structure of the measure was then introduced in 2019 based on a cross-sectional survey of 633 men aged 47 to 93 years, 68% of whom reported 2 or more chronic conditions. |
| --- | --- | --- |
| Purpose | A measure of masculinity for men with chronic disease |
| Content | The MCD-I is a 22-item instrument initially divided into 6 subscales representing six components of masculinity:   1. Optimistic Capacity (4 items) 2. Sexual Importance/Priority (4 items) 3. Family Responsibilities (4 items) 4. Emotional Self-Reliance (2 items) 5. Strength (5 items) 6. Action Approach (3 items)   The scale was later condensed into 5 subscales in 2019:   1. Optimistic Action (9 items) 2. Sexual Priority/Importance (4 items) 3. Family Responsibilities (4 items) 4. Emotional Self-Reliance (2 items) 5. Strength/Fitness (3 items)   Participants rate the degree to which each statement is true for them on a 5-point Likert type scale. |
| Response – Options | Participants respond to 22 items designed to measure masculinity on a 5-point Likert type scale (i.e., 1 = *not true at all* and 5 = *very true*), based on how strongly they relate to each item. |
| Recall Period | Not applicable |
| Endorsement from Evidence-based Measures of Empowerment for Research on Gender Equality (EMERGE) | Not available to the public |
| Practical | To Obtain | Not available for direct, free download. Available as a supplement to publication through academic or institutional access. |
| Scoring and Interpretation |  |
| Respondent Burden | Not provided |
| Administrator Burden | Not provided |
| Translations | None |
| Critical Appraisal Value | Strengths/Cautions/Clinical and Research Applicability | 1. (a) α = .68–.93/men 47-93 yrs w chronic disease1   (b) NR  (c) Error correlations were unconstrained only between within-factor item pairs with large residuals. These were between items: 18 and 14; 7 and 22; 7 and 14; 18 and 22; 12 and 3; 21 and 3; 12 and 19; 10 and 9; 19 and 9/ men 47-93 yrs w chronic disease1   1. Discriminant validity btwn ED and Optimistic Action (r = −.16, p < .001), Sexual Importance/Priority (r = −.52, p < .001), and Strength/Fitness (r = −.18, p < .001), factor corr r= .10 - .53/men 47-93 yrs w chronic disease1 2. 5 factor structure: 57% var exp, RMSEA = .08 (LO90 = 0.070; HI90 = 0.087); robust CFI = .90/men 47-93 yrs w chronic disease1 3. Validated in 633 men with chronic disease, showing a 5-factor structure (57% variance explained), good–excellent reliability (α = .68–.93), and sensitivity to age and sexual health, supporting its use in gender-sensitized health interventions1 |

**Masculinity in Chronic Disease Inventory (MCD-I)**

*bracket indicates item number

1 -------------- 2 -------------- 3 ------------- 4 --------------- 5

Not true at all Very true

**Optimistic Action**

1. I am a positive person
2. I have a forward thinking mind-set
3. My approach is to get on with things
4. I am optimistic about the future
5. If I want to achieve something I can
6. I like to take action in the face of problems
7. I always look for the good in situations
8. I am a fighter
9. I am a competitive person

**Sexual Priority/Importance**

1. Being able to have an erection is important to me
2. Being physically able to have sex is important to me
3. I like to know I am capable of having sex
4. Being able to have sex is like being able to run

**Family Responsibilities**

1. It’s up to me to protect my partner or family
2. Being able to provide for my partner or family is important to me
3. I need to provide financial security for my partner or family
4. I like to know I am looking after my partner or family

**Emotional Self-Reliance**

1. I keep my feelings to myself
2. I tend not to talk about my worries

**Strength/Fitness**

1. Having a good level of fitness is important to me
2. Being an active person is important to me
3. Being physically strong is important to me

**References**

1. Occhipinti S, Laurie K, Hyde MK, et al. Measuring Masculinity in Men With Chronic Disease. *American Journal of Men’s Health*. 2019;13(4). doi:[10.1177/1557988319859706](https://doi.org/10.1177/1557988319859706)

# **Minnesota Multiphase Personality Inventory**

| Descriptive | Development (Language, Author(s), Year) | Developed by Hathaway and McKinley in 1940 using an empirical test construction technique. The first two MMPI manuals suggest that Scale 5, the Masculine-Feminine Pathology scale was developed to measure vocational interests, but later added items with general emphasis on the goal of identifying the personality features related to homosexual men. Subscale 5 is known as Masculinity-Femininity1. |
| --- | --- | --- |
| Purpose | Designed by original authors to identify “homosexual tendencies,” today measures how much a person identifies with stereotypical male and female gender roles2. |
| Content | 56 items |
| Response – Options | True/false |
| Recall Period | NA |
| Endorsement from Evidence-based Measures of Empowerment for Research on Gender Equality (EMERGE) | NR |
| Practical | To Obtain | Strictly licensed and can only be purchased, administered and interpreted by a suitably experienced clinical psychologist or psychiatrist through [Pearson Assesments](https://www.pearsonassessments.com/en-us/Store/Professional-Assessments/Personality-%26-Biopsychosocial/Minnesota-Multiphasic-Personality-Inventory-3/p/P100000004?tab=product-details)3 |
|  | Self-report survey, can be done electronically using Q-global/Q local or on physical paper. Scoring can be done electronically, mailed in if physical, or manually scored by administerer3. |
| Scoring and Interpretation | High: (For Males) Passive, aesthetic and artistic interests, intelligent, sensitive to others, tolerant and has good controls. If very high - possible sex role identity conflicts. (For Females) Rejects the stereotypic female role, has masculine interests in work and hobbies, and may be aggressive and dominating. Low: (For Males) Limited intellectual ability, narrow range of interests, practical, aggressive, and has traditional male interests. (For Females) Passive, submissive, constricted and sensitive4. |
| Respondent Burden | 25–35 minutes to administer by computer, 35–50 minutes to administer by paper and pencil3. |
| Administrator Burden | Requires purchase |
| Translations | Spanish, French3 |
| Critical appraisal and validation in other samples | 1. Reliability:   (a) internal consistency/ sample  (b) test-retest reliability/ sample  (c) measurement error   1. Hypothesis-testing (construct validity)/sample 2. Structural validity/sample 3. Researchers notes | 1. (a) a=0.80/Kuwaiti female uni students7; 0.79 GF, 0.82 GM/USA undergraduates9   (b) MF scale correlates similar to those established in 1950s/undergraduates8  (c) NR   1. MMPI-A ES= -0.81/males in juvenile detention centre6; corr with BSRI and SRBS = 0.35-0.479 2. NR 3. item validity should be studied when   tests developed in one culture are to be used in another culture, since they may attach different meanings to particular items7; can only be administered by experienced clinical psychologist or psychiatrist, should be regarded as complex diagnostic investigation for relatively infrequent use5. |

GF= gender femininity, GM= gender masculinity, SRBS= Sex Role Behaviour Scale

**References**

1. Cox, Andrew C., Nathan C. Weed, and James N. Butcher, ' The MMPI-2: History, Interpretation, and Clinical Issues', in James N. Butcher (ed.), *Oxford Handbook of Personality Assessment*, Oxford Library of Psychology (2009; online edn, Oxford Academic, 18 Sept. 2012), <https://doi.org/10.1093/oxfordhb/9780195366877.013.0014>,
2. Cherry, K. (2024). *The Minnesota Multiphasic Personality Inventory (MMPI) Test*. Verywell Mind. <https://www.verywellmind.com/what-is-the-minnesota-multiphasic-personality-inventory-2795582#toc-how-accurate-is-the-mmpi-test>
3. Ben, Porath, Y. S. and Tellegen, A. *Minnesota Multiphasic Personality Inventory-3.* Pearson. <https://www.pearsonassessments.com/en-us/Store/Professional-Assessments/Personality-%26-Biopsychosocial/Minnesota-Multiphasic-Personality-Inventory-3/p/P100000004?tab=training>
4. Gordon, Robert. (2024). Definitions of MMPI/MMPI-2: Basic Scales and Subscales 1 – 5. *Amazing Things I've Learned as a Scientist, Therapist, and Forensic Psychologist*. <https://www.mmpi-info.com/basic-scales-and-subscales-1-5>.
5. Mike Drayton, The Minnesota Multiphasic Personality Inventory-2 (MMPI-2), *Occupational Medicine*, Volume 59, Issue 2, March 2009, Pages 135–136, <https://doi.org/10.1093/occmed/kqn182>
6. Morton, T. L., Farris, K. L., & Brenowitz, L. H. (2002). MMPI-A Scores and High Points of Male Juvenile Delinquents: Scales 4, 5, and 6 as Markers of Juvenile Delinquency. Psychological Assessment, 14(3), 311–319. <https://doi.org/10.1037/1040-3590.14.3.311>
7. Torki, M. A. (1980). Validation of the MMPI MF Scale in Kuwait. Psychological Reports, 47(3_suppl), 1152–1154. <https://doi.org/10.2466/pr0.1980.47.3f.1152>
8. Todd AL, Gynther MD. Have MMPI MF scale correlates changed in the past 30 years? J Clin Psychol. 1988 Jul;44(4):505-10. doi: 10.1002/1097-4679(198807)44:4<505::aid-jclp2270440405>3.0.co;2-l. PMID: 3170754.
9. Johnson, M. E., Jones, G., & Brems, C. (1996). Concurrent Validity of the MMPI-2 Feminine Gender Role (GF) and Masculine Gender Role (GM) Scales. Journal of Personality Assessment, 66(1), 153–168. https://doi.org/10.1207/s15327752jpa6601_12

# **Normative Male Alexithymia Scale (NMAS)**

| Descriptive | Development (Language, Author(s), Year) | Developed by Levant et al in 2004 based on their theory of a theory of a gender-linked, subclinical alexithymia syndrome due to the fact that men reported significantly higher scores on measures of alexithymia than women. To further investigate theoretical formulations regarding normative male alexithymia, a psychometrically sound method of assessing this subclinical, mild-to-moderate variant was necessary. Already available alexithymia instruments were designed to measure the severe alexithymia found in clinical populations, not the mild-to-moderate aspects that are theoretically linked to masculine gender role socialization. Based on published descriptions of the normative male alexithymia construct, scholars generated 15 items. An additional 14 items were adapted or borrowed from instruments designed to tap related constructs (Gender Role Conflict Scale, Emotional Openness Scale, and Masculine Gender Role Stress Scale). Final pool of 29 items was reviewed to confirm they tapped normative alexithymia. Principal factor analysis was used to extract the latent factors underlying the NMAS items. 20 final items, those with factor loadings above .40, were selected1. |
| --- | --- | --- |
| Purpose | To assess normative male alexithymia |
| Content | One 20-item factor containing questions about respondents’ experience of emotions2 |
| Response – Options | Respondents indicate their responses using a Likert-type format (1 strongly disagree to 7 strongly agree) |
| Recall Period | Not applicable |
| Endorsement from Evidence-based Measures of Empowerment for Research on Gender Equality (EMERGE) | Original items available as supplement to publication |
| Practical | To Obtain | Original 29 items available as supplement to publication |
|  | Self-report questionnaire |
| Scoring and Interpretation | Seven items are reverse-scored with the total scale score calculated from the average. Higher scores are indicative of greater normative male alexithymia1. |
| Respondent Burden | Est. time to complete not given, self-report |
| Administrator Burden | Calculating scores |
| Translations | Not applicable, only available in English |
| Critical Appraisal Value | Strengths/Cautions/Clinical and Research Applicability | 1. (a) α= .80/males 19-73 yrs3   b)1-2 mos: r=0.91/men, r=0.82/women1  c) 0.2% to 0.6% missing responses per item/males 19-73 yrs3 ; Limitations related to self-report and socially desirable responding3   1. r btwn NMAS-BF + TAS-20 alexithymia latent factor: .57, p< .001/males 19-73 yrs3 2. KMO=.933; CFA- IRT based: Best fit- CFI .978; TLI .963; RMSEA .063 (90% CI [.016,.105]; SRMR .030/males 19-73 yrs3; factor loadings .40-.85/ males 19-73 yrs3   Unidimensional structure (IRT model best fit), good reliability, and convergent, concurrent, and incremental validity beyond TAS-20 in predicting restrictive emotionality3 |

**Normative Male Alexithymia Scale**

1 -------------- 2 -------------- 3 ------------- 4 --------------- 5 -------------- 6 -------------- 7

Strongly disagree Strongly agree

1. If I am upset or worried, I don’t like to show it for fear that I will be seen as weak.
2. I feel comfortable expressing my affection to family members and friends.
3. It does not usually occur to me to deal with my stress by talking about what is bothering me.
4. I find it is very hard to cry.
5. When asked, I can easily give an account of what I am feeling.
6. I have no trouble putting my feelings into words and discussing them with others.
7. When someone close to me hurts my feelings, I am able to tell them that I am hurt.
8. I enjoy discussing my innermost feelings with my romantic partner, spouse, or best friend.
9. It is difficult for me to reveal my innermost feelings, even to close friends.
10. If someone asks how I am feeling, I typically say what I am not feeling (e.g., “not too bad”)
11. I don’t see much value in talking about feelings.
12. I have difficulty telling others that I care about them.
13. I have difficulty expressing my emotional needs to my romantic partner, spouse, or best friend.
14. I have difficulty expressing my innermost feelings.
15. Talking about my feelings during sexual relations is difficult for me.
16. I do not like to show my emotions to other people.
17. It is too risky to express my emotions to other people.
18. I am comfortable telling someone that I am afraid of something.
19. I like my feelings
20. I don’t like to talk with others about my feelings

**References**

1. Levant, R.F., Good, G.E., Cook, S., O’Neil, J.M., Smalley, K.B., Owen, K., and Richmond, K. (2006), The Normative Male Alexithymia Scale: Measurement of a Gender-Linked Syndrome. Psychology of Men and Masculinity, 7: 212–224. 10.1037/1524-9220.7.4.212
2. Sullivan, L., Camic, P.M. and Brown, J.S.L. (2015), Masculinity, alexithymia, and fear of intimacy as predictors of UK men's attitudes towards seeking professional psychological help. Br J Health Psychol, 20: 194-211. <https://doi.org/10.1111/bjhp.12089>
3. Levant, R. F., & Parent, M. C. (2019). The development and evaluation of a brief form of the Normative Male Alexithymia Scale (NMAS-BF). Journal of Counseling Psychology, 66(2), 224–233. <https://doi.org/10.1037/cou0000312>

# **Personal Attributes Questionnaire**

| Descriptive | Development (Language, Author(s), Year) | Developed by Spence, Helmreich and Stapp in 1975.1 Validated in a sample of university students enrolled in introductory psychology courses from University of Texas1 |
| --- | --- | --- |
| Purpose | To measure masculinity and femininity characteristics, represented as instrumentality for male valued traits and as expressivity for female valued traits1 |
| Content | 24 items, subdivided into 3 subscales with 8 items each: Male, Female, and Male-Female (androgyny)1 |
| Response – Options | A 5 point scale, from 'Very' to "Not at all", where participants select the option they feel most closely resembles them2 |
| Recall Period | Not specified |
| Endorsement from Evidence-based Measures of Empowerment for Research on Gender Equality (EMERGE) | It is rated on EMERGE:   - Psychometric score: medium - Ease of use score: low |
| Practical | To Obtain | Free questionnaire available online2 |
|  | Can be administered via a computer or in person on paper |
| Scoring and Interpretation | The most extreme items on either the masculine or feminine side are scored as 4, the next most extreme item is scored as 3. (3) |
| Respondent Burden | It should not be a large burden on the respondent, should take approximately several minutes to complete |
| Administrator Burden | Scoring can be done manually |
| Translations | The Personal Attributes Questionnaire was validated in a German population2 |
| Critical Appraisal Value |  | 1. (a) α= 0.79 masc, α = 0.71 fem, ω = 0.76 masc, ω= 0.71 fem/ German individuals with min. age of 142 ; α= .79 masc, α= .87 fem, α= .63 masc-fem/undergraduate students3; All subjects: α= 0.91 GD, α= 0.89 CG, α= 0.81 men GD, α= 0.82 men CG, α= 0.80 women GD, α= 0.80 women CG/ Undergraduate psychology students4   (b) NR  (c) lower reliability than BSRI due to erroneous scoring/ USA undergraduates3   1. Corr btwn BSRI and PAQ E = .77 for men, 0.76 for women; 6 out of 9 convergent validity coeff >0.60/USA undergraduates3 2. PCA: 2 components with 57.7% var exp, component loads: fem- 0.71 – 0.72, masc – 0.73 – 0.79, CFA: χ²(19) = 90.49, p < 0.001, CFI = 0.97, RMSEA = 0.05 [CI: 0.04–0.06], SRMR = 0.03, Correlation between scales: r = 0.44/ German individuals with min. age of 142 3. Confirmed two-factor structure (masculinity and femininity) with moderate correlation; demonstrated acceptable reliability and internal consistency; supported by evidence of construct and convergent validity through associations with related gender and personality measures4 |

References:

1. Spence JT, Helmreich RL: Masculinity and Femininity: Their Psychological Dimensions, Correlates, and Antecedents. Austin, TX, University of Texas Press, 1978 <https://psycnet.apa.org/doiLanding?doi=10.1037%2Ft02466-000>
2. Tibubos AN, Otten D, Beutel ME, Brähler E. Validation of the Personal Attributes Questionnaire-8: Gender Expression and Mental Distress in the German Population in 2006 and 2018. Int J Public Health. 2022 Mar 18;67:1604510.doi: 10.3389/ijph.2022 .1604510 .PMID: 35370535; PMCID: PMC8971198
3. Choi N. (2004). A psychometric examination of the personal attributes questionnaire. The Journal of social psychology, 144(3), 348–352.
4. Lippa R. (1991). Some psychometric characteristics of gender diagnosticity measures: reliability, validity, consistency across domains, and relationship to the big five. Journal of personality and social psychology, 61(6), 1000–1011. <https://doi.org/10.1037//0022-3514.61.6.1000>

# **Self-Perceived Gender Expression (W5)**

| Descriptive | Development (Language, Author(s), Year) | Developed from survey and interview data from 82 participants aged 18-30 by Wylie et al (2010) to as a self-report measure of current socially assigned gender expression1 ; adapted from Clark et al.’s measure of socially assigned gender for middle aged and older women3 |
| --- | --- | --- |
| Purpose | to act as a brief self-report measure of current socially assigned gender expression appropriate for use in large-scale population-based health surveillance |
| Content | Composed of 2 questions about gender expression measured on a 7-point Likert-like scale1 |
| Response – Options | Respondents rate how masculine or feminine people would describe their appearance and mannerisms |
| Recall Period | N/A |
| Endorsement from Evidence-based Measures of Empowerment for Research on Gender Equality (EMERGE) | Scale available through publication: <https://link.springer.com/article/10.1007/s11199-010-9798-y/tables/4> |
| Practical | To Obtain | Available as a supplement to publication1 |
|  | Respondents rate how they believe their gender expression to be perceived by others on a Likert-like scale from Very Feminine to Very Masculine1 |
| Scoring and Interpretation | Numbers assigned to scale (0= very feminine, 6= very masculine) and mean score determined to obtain average of perceived gender expression2 |
| Respondent Burden | Very low; only 2 questions to complete |
| Administrator Burden | Relatively low; must assign scale to rankings for quantitative analysis |
| Translations | N/A, only available in English |
| Critical Appraisal Value | Strengths/Cautions/Clinical and Research Applicability | 1. (a) NR   (b) NR  (c) NR   1. Corr btwn appearance and mannerisms: Spearman r0 = .74, p < .0001/ non-transgender females from adults 18-30 residing in Boston1; Spearman r0 = .68, p = .0002/ non-transgender males from adults 18-30 residing in Boston1; Spearman r0 = .39, p = .11/ transgender participants from adults 18-30 residing in Boston1 2. NR 3. Revised both items to include the qualifier “on average” in the item stem to mitigate uncertainty caused by within-person variation in gender expression and removed gender-specific pronouns1 |

**Self-Perceived Gender Expression (W5)**

1. A person’s appearance, style, or dress may affect the way people think of them. On average, how do you think people would describe your appearance, style, or dress?

- Very feminine
- Mostly feminine
- Somewhat feminine
- Equally feminine and masculine
- Somewhat masculine
- Mostly masculine
- Very masculine

1. A person’s mannerisms (such as the way they walk or talk) may affect the way people think of them. On average, how do you think people would describe your mannerisms?

- Very feminine
- Mostly feminine
- Somewhat feminine
- Equally feminine and masculine
- Somewhat masculine
- Mostly masculine
- Very masculine

**References**

1. Wylie, S.A., Corliss, H.L., Boulanger, V. *et al.* Socially Assigned Gender Nonconformity: A Brief Measure for Use in Surveillance and Investigation of Health Disparities. *Sex Roles* **63**, 264–276 (2010). <https://doi.org/10.1007/s11199-010-9798-y>
2. Tabler, J., Schmitz, R.M., Nagata, J.M., Geist, C., 2021. Self-perceived gender expression, discrimination, and mental health disparities in adulthood. SSM-Mental Health 1 (June), 100020. <https://doi.org/10.1016/j.ssmmh.2021.100020>.
3. Clark, M. A., Armstrong, G., & Bonacore, L. (2005). Measuring Sexual Orientation and Gender Expression Among Middle-Aged and Older Women in a Cancer Screening Study. *Journal of Cancer Education*, *20*(2), 108–112. https://doi.org/10.1207/s15430154jce2002_12

# **Sex-Typed Behaviours and Attitudes Score**

| Descriptive | Development (Language, Author(s), Year) | Developed by Cleveland et al., 2001. They first selected a broad set of items from Wave II of the Add Health study from varying behavioral and attitudinal domains that showed sex differences in a response that could be attributed to individual preferences or behaviors. Care was taken not to select items where social restrictions presented males’ and females’ differential opportunities to participate (e.g., playing baseball). Preliminary analysis using the core sample of Wave II identified 21 questions that were useful in discriminating boys from girls. Stepwise logistic regression was used to select a subset of these questions that significantly contributed to predicting the log odds of being a boy. |
| --- | --- | --- |
| Purpose | To construct a sex-typed behaviors and attitudes score from the probability that an adolescent is male (or female) on the basis of participants’ responses to a set of questions1. |
| Content | 16 self-report items |
| Response – Options | Respondents rate items on a Likert-like scale from 0 to 3 or 4 (based on variable, see below for specific scales) |
| Recall Period | Not applicable |
| Endorsement from Evidence-based Measures of Empowerment for Research on Gender Equality (EMERGE) | Data was obtained from Wave II of the Add Health study1 |
| Practical | To Obtain | Variables available as supplement to publication |
|  | Questionnaire |
| Scoring and Interpretation | Logistic regression predicted the probability  of being a female, using the 16 sex-typical traits. A post  hoc test identified the number of successful predictions made by the model and calculated the percentage of correct predictions2 |
| Respondent Burden | No est. time of completion given |
| Administrator Burden | Variables available as supplement to publication, must perform logistic regression and analyses |
| Translations | Not applicable (only available in English) |
| Critical Appraisal Value | Strengths/Cautions/Clinical and Research Applicability | 1. a) NR   b) NR  c) NR   1. correctly discriminated btwn randomly chosen girl and boy 81.7% of time/White and racial minority adolescent students residing in the US1 2. RMSEA = 0.0021/White and racial minority adolescent students residing in the US1 3. Cronbach’s alpha is appropriate measure of reliability for scales using multiple items to assess single domain, this uses measures from multiple domains1. Initial selection of items considered for inclusion in sex-typicality measure was not chosen based on a specific sampling strategy - representativeness of M and F behaviors and attitudes cannot be guaranteed1 |

**Sex-Typed Behaviours and Attitudes Score**

1. Frequency of crying

0 ------------------ 1 ------------------ 2 ------------------ 3 ------------------4

Every day

1. Frequency of moodiness

0 ------------------ 1 ------------------ 2 ------------------ 3 ------------------4

Every day

1. Frequency of poor appetite

0 ------------------ 1 ------------------ 2 ------------------ 3 ------------------4

Every day

1. Honestly answered questions

0 ------------------ 1 ------------------ 2 ------------------ 3

Completely honest

1. Trouble paying attention

0 ------------------ 1 ------------------ 2 ------------------ 3

Most/all the time

1. Bothered by things

0 ------------------ 1 ------------------ 2 ------------------ 3

Most/all the time

1. Physically fit

0 ------------------ 1 ------------------ 2 ------------------ 3 -------------------- 4

Strongly disagree

1. Serious fighting in past 12 months

0 ------------------ 1 ------------------ 2 ------------------ 3

5 or more times

1. Frequency of exercising

0 ------------------ 1 ------------------ 2 ------------------ 3

5 or more times

1. Frequency of rollerblading/cycling

0 ------------------ 1 ------------------ 2 ------------------ 3

5 or more times

1. How emotional are you

0 ------------------ 1 ------------------ 2 ------------------ 3 --------------- 4

Strongly disagree

1. Do you like yourself as you are

0 ------------------ 1 ------------------ 2 ------------------ 3 --------------- 4

Strongly disagree

1. Live without thought for the future

0 ------------------ 1 ------------------ 2 ------------------ 3 --------------- 4

Strongly disagree

1. How sensitive to others’ feelings

0 ------------------ 1 ------------------ 2 ------------------ 3 --------------- 4

Strongly disagree

1. Do you like to take risks

0 ------------------ 1 ------------------ 2 ------------------ 3 --------------- 4

Strongly disagree

1. Upset by difficult problems

0 ------------------ 1 ------------------ 2 ------------------ 3 --------------- 4

Strongly disagree

**References**

1. Cleveland, H. H., Udry, J. R., & Chantala, K. (2001). Environmental and Genetic Influences on Sex-Typed Behaviors and Attitudes of Male and Female Adolescents. *Personality & Social Psychology Bulletin*, *27*(12), 1587–1598. <https://doi.org/10.1177/01461672012712003>
2. Nowotny, K. M., Peterson, R. L., & Boardman, J. D. (2015). Gendered Contexts: Variation in Suicidal Ideation by Female and Male Youth across U.S. States. *Journal of Health and Social Behavior*, *56*(1), 114–130. <http://www.jstor.org/stable/44001126>
